# Supplementary material for: Therapeutic Effect of Buyang Huanwu Decoction on the Gut Microbiota and Hippocampal Metabolism in a Rat Model of Cerebral Ischemia
Source: Front Cell Infect Microbiol. 2022 Jun 14;12:873096. doi: 10.3389/fcimb.2022.873096 (PMC9237419; doi:10.3389/fcimb.2022.873096)
Supplement: Supplementary file 1 [file Table_1.xlsx]

## Sheet: Sheet1
Chemical Compounds of BHD
Index	Ion mode	Q1 (Da)	Q3 (Da)	Molecular Weight (Da)	Formula	Ionization model	KEGG ID	Compounds	Class I	Class II	CAS	Level	BHD
pme1987	Negative	88.05	71	89.048	C3H7NO2	[M-H]-	C00041	L-Alanine	Amino acids and derivatives	Amino acids and derivatives	56-41-7	3	5524.6
MWSmce461	Positive	102.05	56.05	101.1	C4H7NO2	[M+H]+	-	L-Azetidine-2-carboxylic acid	Amino acids and derivatives	Amino acids and derivatives	2133-34-8	3	105220
pme3033	Positive	104.07	86	103.063	C4H9NO2	[M+H]+	C01026	N,N-Dimethylglycine	Amino acids and derivatives	Amino acids and derivatives	1118-68-9	2	1281000
pme0010	Positive	106	60	105.043	C3H7NO3	[M+H]+	C00065	L-Serine	Amino acids and derivatives	Amino acids and derivatives	56-45-1	3	189090
Lmbn000121	Negative	113.04	96.01	114.043	C4H6N2O2	[M-H]-	C02512	3-Cyano-L-alanine	Amino acids and derivatives	Amino acids and derivatives	6232-19-5	3	20766
pme0006	Positive	116.07	70.1	115.063	C5H9NO2	[M+H]+	C00148	L-Proline	Amino acids and derivatives	Amino acids and derivatives	147-85-3	1	15422000
pme3193	Negative	116.04	74	117.043	C4H7NO3	[M-H]-	-	N-Acetyl-L-glycine	Amino acids and derivatives	Amino acids and derivatives	543-24-8	3	26688
mws0256	Positive	118.09	72.1	117.079	C5H11NO2	[M+H]+	C00183	L-Valine	Amino acids and derivatives	Amino acids and derivatives	72-18-4	1	15351000
mws0671	Positive	120.07	74.1	119.058	C4H9NO3	[M+H]+	C00263	L-Homoserine	Amino acids and derivatives	Amino acids and derivatives	672-15-1	3	364800
mws0230	Positive	120.07	74	119.058	C4H9NO3	[M+H]+	C00188	L-Threonine	Amino acids and derivatives	Amino acids and derivatives	72-19-5	3	356770
MWSmce607	Positive	120.07	56.05	119.12	C4H9NO3	[M+H]+	-	DL-Threonine	Amino acids and derivatives	Amino acids and derivatives	80-68-2	3	145300
MWSslk042	Positive	126.05	80.01	125.13	C6H7NO2	[M+H]+	C02441	N-Ethylmaleimide (NEM)	Amino acids and derivatives	Amino acids and derivatives	128-53-0	3	210170
MWSmce706	Positive	129.07	56.05	128.13	C5H8N2O2	[M+H]+	-	Cyclo(Ala-Gly)	Amino acids and derivatives	Amino acids and derivatives	4526-77-6	3	52384
MWS0813	Negative	128.04	82.03	129.043	C5H7NO3	[M-H]-	C02237	5-Oxoproline	Amino acids and derivatives	Amino acids and derivatives	149-87-1	1	138060
mws0263	Negative	128.04	82.03	129.043	C5H7NO3	[M-H]-	C01879	5-Oxo-L-Proline	Amino acids and derivatives	Amino acids and derivatives	98-79-3	1	143870
ML10181668	Positive	130.09	84.08	129.079	C6H11NO2	[M+H]+	C03969	Cycloleucine	Amino acids and derivatives	Amino acids and derivatives	52-52-8	2	22724000
MWS2413	Negative	130.05	58.03	131.058	C5H9NO3	[M-H]-	C01073	N-acetyl-beta-alanine	Amino acids and derivatives	Amino acids and derivatives	3025-95-4	2	77551
mws0216	Positive	132.07	86	131.058	C5H9NO3	[M+H]+	C01157	Trans-4-Hydroxy-L-proline	Amino acids and derivatives	Amino acids and derivatives	51-35-4	2	25813000
mws0227	Positive	132.1	86.2	131.095	C6H13NO2	[M+H]+	C00123	L-Leucine*	Amino acids and derivatives	Amino acids and derivatives	61-90-5	1	1772000
pme2679	Positive	132	86	131.095	C6H13NO2	[M+H]+	C21096	L-Allo-isoleucine*	Amino acids and derivatives	Amino acids and derivatives	1509-34-8	1	241280
mws1587	Positive	132.1	86	131.095	C6H13NO2	[M+H]+	C01933	L-Norleucine*	Amino acids and derivatives	Amino acids and derivatives	327-57-1	1	591080
mws0258	Positive	132.1	86	131.095	C6H13NO2	[M+H]+	C00407	L-Isoleucine*	Amino acids and derivatives	Amino acids and derivatives	73-32-5	1	643890
mws0001	Positive	133.06	74	132.054	C4H8N2O3	[M+H]+	C00152	L-Asparagine	Amino acids and derivatives	Amino acids and derivatives	70-47-3	1	2316900
pme2527	Positive	133	116	132.09	C5H12N2O2	[M+H]+	C00077	L-Ornithine	Amino acids and derivatives	Amino acids and derivatives	70-26-8	3	472180
mws0219	Negative	132.03	88	133.038	C4H7NO4	[M-H]-	C00049	L-Aspartic Acid	Amino acids and derivatives	Amino acids and derivatives	56-84-8	1	3342400
Zmdp000972	Positive	136.04	91.05	135.035	C4H9NO2S	[M+H]+	C22040	S-Methyl-L-cysteine	Amino acids and derivatives	Amino acids and derivatives	1187-84-4	3	1189000
pme1002	Positive	138.09	103	137.084	C8H11NO	[M+H]+	C00483	L-Tyramine	Amino acids and derivatives	Amino acids and derivatives	51-67-2	2	1213300
MWSmce585	Positive	104.07	59.01	139.58	C4H10ClNO2	[M+H]+	-	Methyl 3-aminopropanoate (hydrochloride)	Amino acids and derivatives	Amino acids and derivatives	3196-73-4	3	4832600
Hmsp000364	Positive	144.1	98.09	143.095	C7H13NO2	[M+H]+	-	L-Cyclopentylglycine	Amino acids and derivatives	Amino acids and derivatives	2521-84-8	2	548830
Rfmb318	Positive	144.1	84.08	144.092	C7H14NO2+	[M]+	C21514	D-Proline betaine	Amino acids and derivatives	Amino acids and derivatives	1195-94-4	3	833870
pme3351	Negative	144.1	126	145.074	C6H11NO3	[M-H]-	C04076	Allysine(6-Oxo DL-Norleucine)	Amino acids and derivatives	Amino acids and derivatives	1962-83-0	3	37027
pme0193	Positive	147.08	84	146.069	C5H10N2O3	[M+H]+	C00064	L-Glutamine	Amino acids and derivatives	Amino acids and derivatives	56-85-9	3	5112200
pme0026	Positive	147.11	84	146.106	C6H14N2O2	[M+H]+	C00047	L-Lysine	Amino acids and derivatives	Amino acids and derivatives	56-87-1	2	6062000
pme0014	Positive	148.06	84	147.053	C5H9NO4	[M+H]+	C00025	L-Glutamic acid	Amino acids and derivatives	Amino acids and derivatives	56-86-0	2	2319900
Zmzn000113	Negative	146.05	102.06	147.053	C5H9NO4	[M-H]-	C03618	L-threo-3-Methylaspartate	Amino acids and derivatives	Amino acids and derivatives	6061-13-8	1	730040
mws1050	Positive	148.06	88	147.053	C5H9NO4	[M+H]+	C00979	O-Acetylserine	Amino acids and derivatives	Amino acids and derivatives	5147-00-2	2	187280
MWSmce608	Positive	148.1	74.02	147.17	C6H13NO3	[M+H]+	-	4-Hydroxyisoleucine	Amino acids and derivatives	Amino acids and derivatives	781658-23-9	3	34512
pme1210	Positive	150.06	61	149.051	C5H11NO2S	[M+H]+	C00073	L-Methionine	Amino acids and derivatives	Amino acids and derivatives	63-68-3	1	2352800
mws0254	Positive	156.08	110	155.069	C6H9N3O2	[M+H]+	C00135	L-Histidine	Amino acids and derivatives	Amino acids and derivatives	71-00-1	1	15656000
pme0128	Negative	159.08	88	160.085	C6H12N2O3	[M-H]-	-	L-Alanyl-L-Alanine	Amino acids and derivatives	Amino acids and derivatives	1948-31-8	3	13809
mws1550	Positive	162.06	73.1	161.051	C6H11NO2S	[M+H]+	C16759	S-Allyl-L-cysteine	Amino acids and derivatives	Amino acids and derivatives	21593-77-1	3	115860
Zmdp002020	Positive	162.06	73.01	161.051	C6H11NO2S	[M+H]+	-	S-(trans-1-propeny1)-L-cysteine	Amino acids and derivatives	Amino acids and derivatives	-	3	88261
pme3382	Negative	160.06	98	161.069	C6H11NO4	[M-H]-	-	N-Acetyl-L-threonine	Amino acids and derivatives	Amino acids and derivatives	17093-74-2	3	90757
pme2914	Negative	161.05	99	162.053	C6H10O5	[M-H]-	C03761	3-Hydroxy-3-methylpentane-1,5-dioic acid	Amino acids and derivatives	Amino acids and derivatives	503-49-1	1	1710600
pme2758	Negative	162.04	144	163.048	C5H9NO5	[M-H]-	C03079	4-Hydroxy-L-glutamic acid	Amino acids and derivatives	Amino acids and derivatives	3913-68-6	3	26671
pme1419	Positive	164.07	104	163.067	C6H13NO2S	[M+H]+	-	L-Methionine methyl ester	Amino acids and derivatives	Amino acids and derivatives	10332-17-9	3	91457
Lmbp000123	Positive	164.07	56.05	163.067	C6H13NO2S	[M+H]+	C17213	L-Homomethionine	Amino acids and derivatives	Amino acids and derivatives	25148-30-5	3	1171000
pme2617	Positive	166.05	102	165.046	C5H11NO3S	[M+H]+	C02989	L-Methionine Sulfoxide	Amino acids and derivatives	Amino acids and derivatives	3226-65-1	2	4365600
pme0021	Positive	166.09	120.08	165.07	C9H11NO2	[M+H]+	C00079	L-Phenylalanine	Amino acids and derivatives	Amino acids and derivatives	63-91-2	1	732760
MWStz091	Positive	169.1	70.07	168.2	C8H12N2O2	[M+H]+	-	Cyclo(L-Ala-L-Pro)	Amino acids and derivatives	Amino acids and derivatives	36357-32-1	1	3203100
Lmrj002261	Positive	171.11	72.08	170.105	C8H14N2O2	[M+H]+	-	Cyclo(Val-Ala)	Amino acids and derivatives	Amino acids and derivatives	15136-27-3	3	342670
MWSmce609	Positive	134.04	74.02	171.16	C4H5CaNO4	[M+H]+	-	Aspartic acid (calcium)	Amino acids and derivatives	Amino acids and derivatives	10389-09-0	3	39071
pme0124	Positive	173.09	115.5	172.085	C7H12N2O3	[M+H]+	-	L-Glycyl-L-proline	Amino acids and derivatives	Amino acids and derivatives	704-15-4	3	23567
pme2853	Negative	172.1	74	173.105	C8H15NO3	[M-H]-	-	Hexanoyl-L-glycine	Amino acids and derivatives	Amino acids and derivatives	24003-67-6	3	55667
pme0253	Positive	174.11	86	173.105	C8H15NO3	[M+H]+	C02710	N-Acetyl-L-leucine	Amino acids and derivatives	Amino acids and derivatives	1188-21-2	3	1091700
MWS4471	Negative	173.06	58.03	174.064	C6H10N2O4	[M-H]-	-	N-Alpha-Acetyl-L-Asparagine	Amino acids and derivatives	Amino acids and derivatives	4033-40-3	3	72379
Zmyn000155	Negative	173.11	131.08	174.1	C7H14N2O3	[M-H]-	C00437	N-α-Acetyl-L-ornithine	Amino acids and derivatives	Amino acids and derivatives	6205-08-9	2	3121000
mws1401	Positive	175.11	84	174.1	C7H14N2O3	[M+H]+	C01047	L-Theanine	Amino acids and derivatives	Amino acids and derivatives	3081-61-6	3	2323300
mws0260	Positive	175.12	116	174.112	C6H14N4O2	[M+H]+	C00062	L-Arginine	Amino acids and derivatives	Amino acids and derivatives	74-79-3	1	1061000
pme2559	Negative	174.04	88	175.048	C6H9NO5	[M-H]-	C01042	N-Acetyl-L-Aspartic Acid	Amino acids and derivatives	Amino acids and derivatives	997-55-7	2	43919
pme0008	Positive	176.1	113	175.096	C6H13N3O3	[M+H]+	C00327	L-Citrulline	Amino acids and derivatives	Amino acids and derivatives	372-75-8	2	801520
mws0875	Positive	179.05	76	178.041	C5H10N2O3S	[M+H]+	C01419	L-Cysteinyl-L-glycine	Amino acids and derivatives	Amino acids and derivatives	19246-18-5	2	1157100
mws0731	Negative	179.05	78.03	180.054	C8H8N2O3	[M-H]-	C05380	Nicotinuric acid	Amino acids and derivatives	Amino acids and derivatives	583-08-4	3	14406
mws0250	Positive	182.08	136.1	181.074	C9H11NO3	[M+H]+	C00082	L-Tyrosine	Amino acids and derivatives	Amino acids and derivatives	60-18-4	1	1494700
Lmrj001341	Positive	185.09	70.06	184.086	C8H12N2O3	[M+H]+	-	Cyclo(Ser-Pro)	Amino acids and derivatives	Amino acids and derivatives	-	1	1208900
pme2602	Negative	184	97	185.009	C3H8NO6P	[M-H]-	C01005	O-Phospho-L-serine	Amino acids and derivatives	Amino acids and derivatives	407-41-0	3	60760
pme0137	Negative	187.07	125	188.08	C7H12N2O4	[M-H]-	-	N-Acetyl-L-Glutamine	Amino acids and derivatives	Amino acids and derivatives	2490-97-3	3	374210
mws5041	Positive	189.12	86.1	188.116	C8H16N2O3	[M+H]+	-	L-Glycyl-L-isoleucine*	Amino acids and derivatives	Amino acids and derivatives	19461-38-2	1	9579200
mws0736	Positive	189.12	86	188.116	C8H16N2O3	[M+H]+	C02155	N-Glycyl-L-leucine*	Amino acids and derivatives	Amino acids and derivatives	869-19-2	1	11400000
pme0122	Positive	189.12	126	188.116	C8H16N2O3	[M+H]+	C02727	N6-Acetyl-L-lysine	Amino acids and derivatives	Amino acids and derivatives	692-04-6	3	608600
pme3388	Positive	189.13	144	188.127	C7H16N4O2	[M+H]+	C01924	Homoarginine	Amino acids and derivatives	Amino acids and derivatives	156-86-5	2	171200
Zmjp000182	Positive	189.13	70.07	188.127	C7H16N4O2	[M+H]+	C03884	N-Monomethyl-L-arginine	Amino acids and derivatives	Amino acids and derivatives	17035-90-4	2	865590
Zmzp000145	Positive	189.16	84.08	188.152	C9H20N2O2	[M+H]+	C03793	Trimethyllysine	Amino acids and derivatives	Amino acids and derivatives	23284-33-5	1	3745300
pme0075	Negative	188.06	128	189.064	C7H11NO5	[M-H]-	C00624	N-Acetyl-L-glutamic acid	Amino acids and derivatives	Amino acids and derivatives	1188-37-0	3	123230
mws0193	Positive	190.12	127	189.111	C7H15N3O3	[M+H]+	C02427	L-Homocitrulline	Amino acids and derivatives	Amino acids and derivatives	1190-49-4	3	31548
MWSslk140	Positive	192.07	56.05	191.25	C7H13NO3S	[M+H]+	C02712	N-Acetyl-L-methionine	Amino acids and derivatives	Amino acids and derivatives	65-82-7	3	181340
pme2743	Positive	194.08	91	193.074	C10H11NO3	[M+H]+	C05598	N-Phenylacetylglycine	Amino acids and derivatives	Amino acids and derivatives	500-98-1	2	42708
Lmrj002244	Positive	195.11	70.06	194.106	C10H14N2O2	[M+H]+	-	Cyclo(Pro-Pro)	Amino acids and derivatives	Amino acids and derivatives	6708-06-1	2	1384400
MWS1771	Positive	196.1	91.05	195.09	C10H13NO3	[M+H]+	C03404	L-Tyrosine methyl ester	Amino acids and derivatives	Amino acids and derivatives	1080-06-4	3	44777
Lmrj002698	Positive	197.13	72.08	196.122	C10H16N2O2	[M+H]+	-	Cyclo(Pro-Val)	Amino acids and derivatives	Amino acids and derivatives	5654-87-5	2	641450
MWStz083	Positive	197.13	70.07	196.3	C10H16N2O2	[M+H]+	-	Cyclo(D-Val-L-Pro)	Amino acids and derivatives	Amino acids and derivatives	27483-18-7	2	915030
MWS0631	Negative	194.04	80.96	200.977	C3H7NO5S2	[M-H]-	C05824	S-Sulfo-L-Cysteine	Amino acids and derivatives	Amino acids and derivatives	1637-71-4	3	5355.6
mws5037	Positive	203.14	86.1	202.132	C9H18N2O3	[M+H]+	-	L-Alanyl-L-leucine	Amino acids and derivatives	Amino acids and derivatives	3303-34-2	1	346040
NK10251888	Positive	203.15	70.07	202.143	C8H18N4O2	[M+H]+	C03626	NG,NG-Dimethyl-L-arginine	Amino acids and derivatives	Amino acids and derivatives	30315-93-6	1	2859400
mws0282	Negative	203.08	116.05	204.09	C11H12N2O2	[M-H]-	C00078	L-Tryptophan	Amino acids and derivatives	Amino acids and derivatives	73-22-3	1	21657000
Zmgn002106	Negative	206.08	58.03	207.09	C11H13NO3	[M-H]-	C03519	N-Acetyl-L-phenylalanine	Amino acids and derivatives	Amino acids and derivatives	2018-61-3	1	242030
MWSslk120	Positive	208.1	120.08	207.226	C11H13NO3	[M+H]+	-	N-Acetyl-DL-phenylalanine	Amino acids and derivatives	Amino acids and derivatives	2901-75-9	3	1994900
MWSmce119	Positive	175.11	70.06	210.66	C6H15ClN4O2	[M+H]+	-	L-Arginine (hydrochloride)	Amino acids and derivatives	Amino acids and derivatives	1119-34-2	1	10164000
pmb2673	Negative	210.04	135.1	211.048	C9H9NO5	[M-H]-	-	6-Hydroxydopaquinone	Amino acids and derivatives	Amino acids and derivatives	135791-48-9	3	21136
Lmhp002764	Positive	211.13	70.07	211.144	C11H18N2O2	[M+H]+	-	Cyclo(Pro-Leu)	Amino acids and derivatives	Amino acids and derivatives	5654-86-4	3	2103500
pme0170	Positive	217.13	158	216.122	C8H16N4O3	[M+H]+	-	N-Acetyl-L-Arginine	Amino acids and derivatives	Amino acids and derivatives	155-84-0	1	1106800
pme2566	Negative	217.08	199	218.09	C8H14N2O5	[M-H]-	-	5-L-Glutamyl-L-amino acid	Amino acids and derivatives	Amino acids and derivatives	5875-41-2	3	42290
pme1228	Positive	221.09	204	220.085	C11H12N2O3	[M+H]+	C00643	5-Hydroxy-L-tryptophan	Amino acids and derivatives	Amino acids and derivatives	56-69-9	3	119870
mws5042	Positive	223.11	120.09	222.1	C11H14N2O3	[M+H]+	-	L-Glycyl-L-phenylalanine	Amino acids and derivatives	Amino acids and derivatives	721-66-4	1	11328000
MWS4296	Positive	223.11	120.08	222.1	C11H14N2O3	[M+H]+	-	Glycylphenylalanine	Amino acids and derivatives	Amino acids and derivatives	3321-03-7	1	10697000
mws0520	Positive	224.09	136	223.084	C11H13NO4	[M+H]+	-	N-Acetyl-L-tyrosine	Amino acids and derivatives	Amino acids and derivatives	537-55-3	3	308480
pme0116	Positive	227.11	156	226.107	C9H14N4O3	[M+H]+	C00386	L-Carnosine	Amino acids and derivatives	Amino acids and derivatives	305-84-0	2	15495
MWStz170	Positive	227.14	86.06	226.3	C11H18N2O3	[M+H]+	-	Cyclo(L-Leu-trans-4-hydroxy-L-Pro)	Amino acids and derivatives	Amino acids and derivatives	115006-86-5	2	3178800
Lmhp001430	Positive	227.09	116.07	227.103	C10H14N2O4	[M+H]+	-	Cyclo(Pro-Glu)	Amino acids and derivatives	Amino acids and derivatives	-	3	824080
Lmhp001461	Positive	229.15	70.07	229.154	C11H20N2O3	[M+H]+	-	L-Prolyl-L-Leucine	Amino acids and derivatives	Amino acids and derivatives	52899-07-7	3	5333800
Lmhp001670	Positive	231.16	72.08	231.17	C11H22N2O3	[M+H]+	-	L-Valyl-L-Leucine	Amino acids and derivatives	Amino acids and derivatives	3989-97-7	3	17968000
Hmlp001371	Positive	235.11	120.08	234.1	C12H14N2O3	[M+H]+	-	Cyclo(Tyr-Ala)	Amino acids and derivatives	Amino acids and derivatives	21754-26-7	2	192300
pmb0962	Positive	235.1	118.3	234.158	C10H22N2O4	[M+H]+	-	L-Lysine-Butanoic Acid	Amino acids and derivatives	Amino acids and derivatives	80407-71-2	3	73286
pme1313	Positive	237.09	192	236.08	C11H12N2O4	[M+H]+	C02700	N'-Formylkynurenine	Amino acids and derivatives	Amino acids and derivatives	1022-31-7	3	58333
mws4176	Positive	237.12	120.09	236.116	C12H16N2O3	[M+H]+	-	L-Alanyl-L-Phenylalanine	Amino acids and derivatives	Amino acids and derivatives	3061-90-3	1	4642200
Lmhp003064	Positive	245.12	120.08	245.128	C14H16N2O2	[M+H]+	C11847	Cyclo(Pro-Phe)	Amino acids and derivatives	Amino acids and derivatives	3705-26-8	3	1772700
Lmhp002031	Positive	245.18	86.1	245.186	C12H24N2O3	[M+H]+	-	L-Leucyl-L-Leucine	Amino acids and derivatives	Amino acids and derivatives	3303-31-9	2	8543200
mws0124	Positive	247.11	130	246.1	C13H14N2O3	[M+H]+	-	N-(3-Indolylacetyl)-L-alanine	Amino acids and derivatives	Amino acids and derivatives	57105-39-2	3	53765
pmb2591	Negative	245.09	203.2	246.1	C13H14N2O3	[M-H]-	-	N-Acetyl-L-Tryptophan	Amino acids and derivatives	Amino acids and derivatives	1218-34-4	1	3233400
Lmrj002087	Positive	247.13	86.09	246.121	C10H18N2O5	[M+H]+	-	L-Isoleucyl-L-Aspartate	Amino acids and derivatives	Amino acids and derivatives	-	2	3834900
Zmdp001647	Positive	247.13	184.1	246.122	C10H18N2O5	[M+H]+	-	γ-Glutamyl-L-valine	Amino acids and derivatives	Amino acids and derivatives	-	3	270760
Zmdp002216	Positive	261.14	86.1	260.137	C11H20N2O5	[M+H]+	-	L-γ-Glutamyl-L-leucine	Amino acids and derivatives	Amino acids and derivatives	2566-39-4	1	1880900
MWStz211	Positive	261.12	120.08	260.3	C14H16N2O3	[M+H]+	-	Cyclo(L-Phe-trans-4-hydroxy-L-Pro)	Amino acids and derivatives	Amino acids and derivatives	118477-06-8	1	1020700
MWS4309	Positive	262.12	188.07	261.111	C13H15N3O3	[M+H]+	-	Glycyl-tryptophan	Amino acids and derivatives	Amino acids and derivatives	2390-74-1	3	713670
Lmhp001732	Positive	263.13	70.07	263.139	C14H18N2O3	[M+H]+	-	L-Prolyl-L-Phenylalanine	Amino acids and derivatives	Amino acids and derivatives	13589-02-1	3	1986000
mws0715	Negative	263.1	145	264.111	C13H16N2O4	[M-H]-	C04148	Phenylacetyl-L-glutamine	Amino acids and derivatives	Amino acids and derivatives	28047-15-6	3	16362
Lmhp002001	Positive	265.15	72.08	264.147	C14H20N2O3	[M+H]+	-	L-Valyl-L-Phenylalanine	Amino acids and derivatives	Amino acids and derivatives	3918-92-1	3	7530200
pme2890	Positive	269.06	136	268.055	C8H16N2O4S2	[M+H]+	C01817	L-Homocystine	Amino acids and derivatives	Amino acids and derivatives	626-72-2	3	53527
pmp001257	Positive	272.22	254.21	271.215	C15H29NO3	[M+H]+	-	Tridecanoylglycine	Amino acids and derivatives	Amino acids and derivatives	-	3	252020
MWSmce356	Positive	275.07	114.02	274.25	C5H14N4O7S	[M+H]+	-	L-Canavanine sulfate	Amino acids and derivatives	Amino acids and derivatives	2219-31-0	2	373640
pmb0034	Positive	277.1	114.7	276.096	C10H16N2O7	[M+H]+	C01425	L-α-Glutamyl-L-Glutamic Acid	Amino acids and derivatives	Amino acids and derivatives	3929-61-1	3	25968
Lmrj002793	Positive	277.12	120.08	276.112	C14H16N2O4	[M+H]+	-	Cyclo(Phe-Glu)	Amino acids and derivatives	Amino acids and derivatives	-	1	1043900
pme1712	Negative	275	257	276.132	C11H20N2O6	[M-H]-	C00449	L-Saccharopine	Amino acids and derivatives	Amino acids and derivatives	997-68-2	3	451270
Zmdp001663	Positive	279.1	133.03	278.094	C10H18N2O5S	[M+H]+	-	γ-glutamylmethionine	Amino acids and derivatives	Amino acids and derivatives	17663-87-5	3	55606
mws0629	Positive	281.11	166	280.106	C13H16N2O5	[M+H]+	-	L-Aspartyl-L-Phenylalanine	Amino acids and derivatives	Amino acids and derivatives	13433-09-5	1	1334200
Zmdn001564	Negative	293.11	164.07	294.122	C14H18N2O5	[M-H]-	-	γ-Glutamylphenylalanine	Amino acids and derivatives	Amino acids and derivatives	7432-24-8	2	542540
pme1086	Negative	306.08	143	307.084	C10H17N3O6S	[M-H]-	C00051	Glutathione reduced form	Amino acids and derivatives	Amino acids and derivatives	70-18-8	2	77099
pmb2855	Negative	307	145	308.122	C11H20N2O8	[M-H]-	-	L-Glutamine-O-glycoside	Amino acids and derivatives	Amino acids and derivatives	-	3	127700
mws0805	Negative	308.1	87.01	309.106	C11H19NO9	[M-H]-	C00270	N-Acetylneuraminic acid	Amino acids and derivatives	Amino acids and derivatives	131-48-6	3	10374
pmb2857	Negative	308.1	146.1	309.106	C11H19NO9	[M-H]-	-	L-Glutamic acid-O-glycoside	Amino acids and derivatives	Amino acids and derivatives	-	3	129990
Zmdp001857	Positive	311.12	165.05	310.116	C14H18N2O6	[M+H]+	-	γ-Glutamyltyrosine	Amino acids and derivatives	Amino acids and derivatives	7432-23-7	3	570070
mws0636	Positive	313.15	166	312.147	C18H20N2O3	[M+H]+	-	L-Phenylalanyl-L-phenylalanine	Amino acids and derivatives	Amino acids and derivatives	2577-40-4	1	201900
mws0582	Positive	322.11	130	321.099	C11H19N3O6S	[M+H]+	C11347	S-(Methyl)glutathione	Amino acids and derivatives	Amino acids and derivatives	2922-56-7	2	303740
pme2074	Negative	322.4	129.7	323.21	C18H29NO4	[M-H]-	C18699	(-)-Jasmonoyl-L-Isoleucine	Amino acids and derivatives	Amino acids and derivatives	120330-93-0	3	274820
Smjp002269	Positive	328.12	119.05	327.11	C18H17NO5	[M+H]+	-	N-[3-(4-Hydroxyphenyl)acryloyl]-L-tyrosine	Amino acids and derivatives	Amino acids and derivatives	77201-66-2	3	284160
MWS2426	Negative	332.13	203.08	333.132	C16H19N3O5	[M-H]-	-	Tryptophan glutamic acid	Amino acids and derivatives	Amino acids and derivatives	36099-95-3	3	70425
pme1286	Positive	385.13	250	384.122	C14H20N6O5S	[M+H]+	C00021	S-(5'-Adenosy)-L-homocysteine	Amino acids and derivatives	Amino acids and derivatives	979-92-0	1	1451800
pmb1283	Positive	448.1	163.5	447.215	C18H33N5O6S	[M+H]+	-	L-Glutaminyl-L-valyl-L-valyl-L-cysteine	Amino acids and derivatives	Amino acids and derivatives	-	3	16456
pmb0464	Positive	458.1	116.3	457.143	C16H27NO14	[M+H]+	-	L-Aspartic acid-O-diglucoside	Amino acids and derivatives	Amino acids and derivatives	-	3	103660000
mws4134	Negative	611.14	306.08	612.152	C20H32N6O12S2	[M-H]-	C00127	Oxiglutatione	Amino acids and derivatives	Amino acids and derivatives	27025-41-8	3	1001500
mws1358	Negative	109.03	81	110.037	C6H6O2	[M-H]-	C00090	Pyrocatechol	Phenolic acids	Phenolic acids	120-80-9	3	17478
pmb0069	Positive	122	105	121.053	C7H7NO	[M+H]+	C09815	Benzamide	Phenolic acids	Phenolic acids	55-21-0	3	4505500
Lmbn001930	Negative	121.03	77.04	122.037	C7H6O2	[M-H]-	C06202	2-Hydroxybenzaldehyde (Salicylaldehyde)	Phenolic acids	Phenolic acids	90-02-8	3	365450
pme0241	Positive	123.04	79	122.037	C7H6O2	[M+H]+	C00180	Benzoic acid	Phenolic acids	Phenolic acids	65-85-0	3	3040400
mws0628	Negative	121.03	92	122.037	C7H6O2	[M-H]-	C00633	4-Hydroxybenzaldehyde	Phenolic acids	Phenolic acids	123-08-0	1	7424500
MWS2091	Positive	123.08	77.04	122.073	C8H10O	[M+H]+	C07112	1-Phenylethanol	Phenolic acids	Phenolic acids	98-85-1	3	88175
NK10264324	Positive	127.04	81.03	126.032	C6H6O3	[M+H]+	C02183	1,3,5-Benzenetriol	Phenolic acids	Phenolic acids	108-73-6	3	99568
mws1480	Negative	132.05	99.92	133.053	C8H7NO	[M-H]-	C03766	4-Hydroxyphenylacetonitrile	Phenolic acids	Phenolic acids	14191-95-8	3	40881
MWS1848	Negative	135.05	92.03	136.052	C8H8O2	[M-H]-	C00548	Phenyl acetate	Phenolic acids	Phenolic acids	122-79-2	2	529970
Hmbn002174	Negative	135.05	120.02	136.053	C8H8O2	[M-H]-	C10700	4-Hydroxyacetophenone	Phenolic acids	Phenolic acids	99-93-4	2	53576
MWSmce247	Negative	135.05	91.06	136.15	C8H8O2	[M-H]-	C07215	o-Toluic acid	Phenolic acids	Phenolic acids	118-90-1	3	11931
mws1078	Positive	138.05	92.1	137.048	C7H7NO2	[M+H]+	C00108	Anthranilic Acid*	Phenolic acids	Phenolic acids	118-92-3	2	586800
mws1336	Positive	138.06	120	137.048	C7H7NO2	[M+H]+	C00568	4-Aminobenzoic acid*	Phenolic acids	Phenolic acids	150-13-0	2	161870
Hmgn001653	Negative	137.02	93.04	138.032	C7H6O3	[M-H]-	C16700	Protocatechualdehyde	Phenolic acids	Phenolic acids	139-85-5	2	4863100
mws0749	Negative	137.02	93	138.032	C7H6O3	[M-H]-	C00156	4-Hydroxybenzoic acid	Phenolic acids	Phenolic acids	99-96-7	2	11192000
Lmgn001670	Negative	137.03	93.04	138.032	C7H6O3	[M-H]-	C00805	Salicylic acid	Phenolic acids	Phenolic acids	69-72-7	1	7445100
Lmbn001981	Negative	137.02	93.03	138.032	C7H6O3	[M-H]-	C05585	2,5-Dihydroxybenzaldehyde	Phenolic acids	Phenolic acids	1194-98-5	2	8105900
MWS1850	Positive	139.08	56.96	138.068	C8H10O2	[M+H]+	-	2-Phenoxyethanol	Phenolic acids	Phenolic acids	122-99-6	3	33922
mws2368	Negative	137.06	119.05	138.068	C8H10O2	[M-H]-	C06044	Tyrosol	Phenolic acids	Phenolic acids	501-94-0	3	66053
pme2828	Positive	140	99	139.027	C6H5NO3	[M+H]+	C00870	4-Nitrophenol	Phenolic acids	Phenolic acids	100-02-7	3	39359000
MWS2066	Negative	143.05	115.06	144.058	C10H8O	[M-H]-	C11714	1-Naphthol*	Phenolic acids	Phenolic acids	90-15-3	3	128830
MWS1875	Negative	143.05	115.05	144.058	C10H8O	[M-H]-	C11713	2-Naphthol*	Phenolic acids	Phenolic acids	135-19-3	3	126700
mws1024	Negative	147.05	129	148.052	C9H8O2	[M-H]-	C05608	p-Coumaraldehyde	Phenolic acids	Phenolic acids	2538-87-6	2	70791
mws2213	Negative	147.05	77.01	148.052	C9H8O2	[M-H]-	C00423	Cinnamic acid	Phenolic acids	Phenolic acids	140-10-3	2	349790
mws0921	Negative	149.06	131	150.068	C9H10O2	[M-H]-	C02646	p-Coumaryl alcohol	Phenolic acids	Phenolic acids	3690-05-9	3	245910
mws0008	Negative	149.06	105	150.068	C9H10O2	[M-H]-	C05629	Hydrocinnamic acid	Phenolic acids	Phenolic acids	501-52-0	1	219510
MWSmce467	Negative	149.06	108.02	150.17	C9H10O2	[M-H]-	-	4-Allylcatechol	Phenolic acids	Phenolic acids	1126-61-0	3	4194.8
MWSmce653	Negative	149.06	106.04	150.17	C9H10O2	[M-H]-	-	2'-Hydroxy-4'-methylacetophenone	Phenolic acids	Phenolic acids	6921-64-8	3	13364
MWSmce283	Negative	149.07	92.03	150.17	C9H10O2	[M-H]-	C13342	Paroxypropione	Phenolic acids	Phenolic acids	70-70-2	3	120460
MWSmce573	Negative	149.06	105.07	150.18	C9H10O2	[M-H]-	-	3,4-Dimethylbenzoic acid	Phenolic acids	Phenolic acids	619-04-5	3	5523.4
MWS4301	Negative	151.04	107.05	152.047	C8H8O3	[M-H]-	C05593	3-hydroxyphenylacetic acid	Phenolic acids	Phenolic acids	621-37-4	3	31081
MWS5185	Negative	151.04	109.03	152.047	C8H8O3	[M-H]-	C03663	2',4'-Dihydroxyacetophenone	Phenolic acids	Phenolic acids	89-84-9	3	125970
mws0458	Negative	151.04	136	152.047	C8H8O3	[M-H]-	C00755	Vanillin	Phenolic acids	Phenolic acids	121-33-5	2	8190400
MWS1846	Negative	151.04	93.03	152.047	C8H8O3	[M-H]-	C02181	Phenoxyacetic acid	Phenolic acids	Phenolic acids	122-59-8	3	8776.8
MWS3149	Negative	151.04	107.05	152.047	C8H8O3	[M-H]-	-	3-METHOXYBENZOIC ACID	Phenolic acids	Phenolic acids	586-38-9	3	402130
MWS2058	Negative	151.04	107.05	152.047	C8H8O3	[M-H]-	C14088	3-Methylsalicylic acid	Phenolic acids	Phenolic acids	83-40-9	3	101780
pme2362	Negative	151.04	107	152.047	C8H8O3	[M-H]-	C01984	Mandelic acid	Phenolic acids	Phenolic acids	90-64-2	3	44655
pma0675	Positive	153.05	135.04	152.047	C8H8O3	[M+H]+	-	o-Anisic acid	Phenolic acids	Phenolic acids	579-75-9	3	4844.2
MWSmce040	Positive	153.05	65.04	152.15	C8H8O3	[M+H]+	-	Isovanillin	Phenolic acids	Phenolic acids	621-59-0	3	1724200
MWSmce370	Negative	151.04	107.05	152.15	C8H8O3	[M-H]-	C00642	4-Hydroxyphenylacetic acid	Phenolic acids	Phenolic acids	156-38-7	3	34063
MWSmce468	Negative	151.04	77.04	152.15	C8H8O3	[M-H]-	C10804	2-hydroxymethyl benzoic acid	Phenolic acids	Phenolic acids	612-20-4	3	15736
MWSmce713	Negative	151.08	106.04	152.19	C9H12O2	[M-H]-	-	3-(4-Hydroxyphenyl)-1-propanol	Phenolic acids	Phenolic acids	10210-17-0	3	10882
ML10177402	Negative	152.03	108.05	153.043	C7H7NO3	[M-H]-	C02518	4-Aminosalicylic acid*	Phenolic acids	Phenolic acids	65-49-6	3	16032
mws0444	Negative	152.04	108	153.043	C7H7NO3	[M-H]-	-	3-Aminosalicylic acid*	Phenolic acids	Phenolic acids	570-23-0	3	61399
mws0885	Negative	153.02	109.03	154.027	C7H6O4	[M-H]-	-	2,4-Dihydroxybenzoic acid*	Phenolic acids	Phenolic acids	89-86-1	1	1351900
mws0180	Negative	153.02	109.03	154.027	C7H6O4	[M-H]-	C00628	2,5-Dihydroxybenzoic acid; Gentisic Acid*	Phenolic acids	Phenolic acids	490-79-9	1	1578600
mws0639	Negative	153.02	109.03	154.027	C7H6O4	[M-H]-	C00196	2,3-Dihydroxybenzoic Acid*	Phenolic acids	Phenolic acids	303-38-8	1	289480
mws0183	Negative	153.02	109.03	154.027	C7H6O4	[M-H]-	C00230	3,4-Dihydroxybenzoic acid (Protocatechuic acid)*	Phenolic acids	Phenolic acids	99-50-3	1	4179000
pmf0440	Positive	163.08	91.1	162.068	C10H10O2	[M+H]+	C10475	4-MethoxycinnaMaldehyde	Phenolic acids	Phenolic acids	1963-36-6	3	92317
Lmmn001643	Negative	163.04	119.05	164.047	C9H8O3	[M-H]-	C01772	2-Hydroxycinnamic acid*	Phenolic acids	Phenolic acids	583-17-5	2	15699000
Lmbn002648	Negative	163.04	119.05	164.047	C9H8O3	[M-H]-	C02763	α-Hydroxycinnamic Acid*	Phenolic acids	Phenolic acids	5801-57-0	2	1355200
pme1439	Positive	165.05	119	164.047	C9H8O3	[M+H]+	C00811	p-Coumaric acid	Phenolic acids	Phenolic acids	501-98-4	3	740630
pme3083	Negative	164.04	120	165.043	C8H7NO3	[M-H]-	C05653	2-(Formylamino)benzoic acid	Phenolic acids	Phenolic acids	3342-77-6	3	3200800
pme0281	Negative	165.02	121.03	166.027	C8H6O4	[M-H]-	C06337	Terephthalic acid*	Phenolic acids	Phenolic acids	100-21-0	1	18769000
Zmhn001420	Negative	165.02	121.03	166.027	C8H6O4	[M-H]-	-	5,7-Dihydroxy-1(3H)-isobenzofuranone	Phenolic acids	Phenolic acids	27979-58-4	2	637670
pme0282	Negative	165.02	77.04	166.027	C8H6O4	[M-H]-	C01606	Phthalic acid*	Phenolic acids	Phenolic acids	88-99-3	1	2962600
mws1382	Negative	165.06	122.04	166.063	C9H10O3	[M-H]-	C11380	4'-Hydroxy-3'-methoxyacetophenone (Acetovanillone)	Phenolic acids	Phenolic acids	498-02-2	3	31330
Lmrn003000	Negative	165.06	103.06	166.063	C9H10O3	[M-H]-	C05607	2-Hydroxy-3-phenylpropanoic acid	Phenolic acids	Phenolic acids	7326-19-4	1	267400
mws0346	Negative	165.06	106	166.063	C9H10O3	[M-H]-	C11457	3-(3-Hydroxyphenyl)-propionic acid	Phenolic acids	Phenolic acids	621-54-5	3	19640
pme3381	Negative	165.06	106	166.063	C9H10O3	[M-H]-	-	3-Hydroxyphenylacetic Acid Methyl Ester	Phenolic acids	Phenolic acids	42058-59-3	3	27879
Lmbn005172	Negative	165.06	119.05	166.063	C9H10O3	[M-H]-	-	2,6-Dimethoxybenzaldehyde	Phenolic acids	Phenolic acids	3392-97-0	2	1124000
MWS1839	Negative	165.06	92.03	166.063	C9H10O3	[M-H]-	-	Ethylparaben	Phenolic acids	Phenolic acids	120-47-8	3	35249
pmn001681	Negative	165.09	149.06	166.099	C10H14O2	[M-H]-	-	1-(4-Methoxyphenyl)-1-propanol	Phenolic acids	Phenolic acids	5349-60-0	2	45734
MWSmce537	Positive	167.07	124.05	166.17	C9H10O3	[M+H]+	C02201	Veratraldehyde	Phenolic acids	Phenolic acids	120-14-9	3	12958
NK10253223	Positive	168.06	94.06	167.058	C8H9NO3	[M+H]+	C05831	2-Amino-3-methoxybenzoic acid	Phenolic acids	Phenolic acids	3177-80-8	2	48512
pme2598	Negative	167.03	123.04	168.042	C8H8O4	[M-H]-	C01161	3,4-Dihydroxybenzeneacetic acid	Phenolic acids	Phenolic acids	102-32-9	3	246360
pme1292	Negative	167.1	123.04	168.042	C8H8O4	[M-H]-	C00544	Homogentisic acid	Phenolic acids	Phenolic acids	451-13-8	3	65322
MWS3136	Negative	167.04	108.03	168.042	C8H8O4	[M-H]-	-	4-Methoxysalicylic Acid	Phenolic acids	Phenolic acids	2237-36-7	3	176080
mws0028	Negative	167.03	108.02	168.042	C8H8O4	[M-H]-	C06672	Vanillic acid	Phenolic acids	Phenolic acids	121-34-6	2	3254500
Hmbp001276	Positive	169.05	65.03	168.042	C8H8O4	[M+H]+	-	Gallacetophenone	Phenolic acids	Phenolic acids	528-21-2	3	22226
mws4193	Negative	167.07	121.03	168.079	C9H12O3	[M-H]-	-	Homovanillic alcohol; 4-Hydroxy-3-methoxyphenethanol	Phenolic acids	Phenolic acids	2380-78-1	3	808980
MWSslk066	Positive	169.05	65.04	168.15	C8H8O4	[M+H]+	-	Isovanillic acid	Phenolic acids	Phenolic acids	645-08-9	3	501930
MWSmce501	Negative	167.04	108.02	168.15	C8H8O4	[M-H]-	-	Methyl 3,4-dihydroxybenzoate	Phenolic acids	Phenolic acids	2150-43-8	3	46792
mws0024	Negative	169.01	125	170.022	C7H6O5	[M-H]-	C01424	Gallic acid	Phenolic acids	Phenolic acids	149-91-7	1	42193000
Xmbp001692	Positive	171.03	81.03	170.022	C7H6O5	[M+H]+	-	2,4,6-Trihydroxybenzoic acid	Phenolic acids	Phenolic acids	83-30-7	3	332590
MWS2067	Negative	169.07	141.07	170.073	C12H10O	[M-H]-	C02499	2-Phenylphenol	Phenolic acids	Phenolic acids	90-43-7	3	12450
MWSslk138	Negative	169.01	151	170.12	C7H6O5	[M-H]-	-	2,3,4-Trihydroxybenzoic acid	Phenolic acids	Phenolic acids	610-02-6	3	47433
MWSmce681	Negative	170.99	127	172.56	C7H5ClO3	[M-H]-	-	4-Chlorosalicylic acid	Phenolic acids	Phenolic acids	5106-98-9	3	571600
pmb2795	Negative	177	145	178.063	C10H10O3	[M-H]-	-	4-Methoxycinnamic acid	Phenolic acids	Phenolic acids	830-09-1	3	113880
mws1200	Negative	177	145	178.063	C10H10O3	[M-H]-	-	Trans-4-Hydroxycinnamic Acid Methyl Ester	Phenolic acids	Phenolic acids	19367-38-5	2	166080
mws1195	Positive	179.07	147.1	178.063	C10H10O3	[M+H]+	-	p-Coumaric acid methyl ester	Phenolic acids	Phenolic acids	3943-97-3	3	104720
mws0009	Positive	179.07	91.05	178.063	C10H10O3	[M+H]+	C02666	Coniferaldehyde	Phenolic acids	Phenolic acids	20649-42-7	1	101560
pme3255	Positive	179.11	123	178.099	C11H14O2	[M+H]+	C10454	Methyleugenol	Phenolic acids	Phenolic acids	93-15-2	3	46551
mws2212	Negative	179.03	135.05	180.042	C9H8O4	[M-H]-	C01197	Caffeic acid	Phenolic acids	Phenolic acids	331-39-5	1	14956000
Lmbn004847	Negative	179.07	146.04	180.079	C10H12O3	[M-H]-	-	4-Methoxyphenylpropionic acid	Phenolic acids	Phenolic acids	-	1	819010
mws0093	Negative	179.07	146	180.079	C10H12O3	[M-H]-	C00590	Coniferyl alcohol	Phenolic acids	Phenolic acids	458-35-5	1	2795200
MWSmce001	Positive	181.05	107.05	180.16	C9H8O4	[M+H]+	-	5-Acetylsalicylic acid	Phenolic acids	Phenolic acids	13110-96-8	3	32245
MWSmce517	Negative	179.11	137.1	180.24	C11H16O2	[M-H]-	-	Olivetol	Phenolic acids	Phenolic acids	500-66-3	3	1982.6
mws0117	Negative	181.05	122	182.058	C9H10O4	[M-H]-	C05582	Homovanillic acid; 4-Hydroxy-3-methoxyphenylacetic acid	Phenolic acids	Phenolic acids	306-08-1	3	38007
Lmlp001436	Positive	183.07	165.06	182.058	C9H10O4	[M+H]+	C10447	Dihydrocaffeic acid	Phenolic acids	Phenolic acids	1078-61-1	3	29780
MWS3046	Negative	181.05	121.03	182.058	C9H10O4	[M-H]-	-	3-(3-Hydroxyphenyl)-3-hydroxypropanoic acid	Phenolic acids	Phenolic acids	3247-75-4	3	121640
MWS5206	Negative	181.05	135.04	182.058	C9H10O4	[M-H]-	C03672	Hydroxyphenyllactic acid	Phenolic acids	Phenolic acids	306-23-0	3	510580
mws1350	Negative	181.05	151	182.058	C9H10O4	[M-H]-	-	Syringaldehyde; 4-Hydroxy-3,5-Dimethoxybenzaldehyde	Phenolic acids	Phenolic acids	134-96-3	2	1465300
MA10002917	Negative	183.01	109.02	184.012	C6H4N2O5	[M-H]-	C02496	2,4-Dinitrophenol	Phenolic acids	Phenolic acids	51-28-5	3	91036
MWSmce387	Negative	183.03	124.02	184.15	C8H8O5	[M-H]-	C05616	3-O-Methylgallic acid	Phenolic acids	Phenolic acids	3934-84-7	2	596380
MWSslk083	Negative	183.06	153.02	184.19	C9H12O4	[M-H]-	-	4-Hydroxy-3,5-dimethoxybenzyl alcohol	Phenolic acids	Phenolic acids	530-56-3	3	18446
MWSmce658	Positive	193.05	153.02	192.17	C10H8O4	[M+H]+	-	Noreugenin	Phenolic acids	Phenolic acids	1013-69-0	3	12078
MWSslk144	Positive	193.09	147.04	192.21	C11H12O3	[M+H]+	-	p-Coumaric acid ethyl ester	Phenolic acids	Phenolic acids	7362-39-2	3	18606
mws0014	Negative	193.05	134.01	194.058	C10H10O4	[M-H]-	C01494	Ferulic acid*	Phenolic acids	Phenolic acids	537-98-4	1	710830
Lmdn003756	Negative	193.05	135.05	194.058	C10H10O4	[M-H]-	C10477	Methyl caffeate	Phenolic acids	Phenolic acids	3843-74-1	3	1335100
pme0422	Negative	193.06	134	194.058	C10H10O4	[M-H]-	C10470	Isoferulic Acid*	Phenolic acids	Phenolic acids	537-73-5	1	1375200
MWSmce632	Positive	195.06	93.03	194.19	C10H10O4	[M+H]+	-	Vanillin acetate	Phenolic acids	Phenolic acids	881-68-5	2	1522100
Hmmn004283	Negative	195.07	136.05	196.074	C10H12O4	[M-H]-	-	Dihydroferulic Acid	Phenolic acids	Phenolic acids	1135-23-5	1	511590
mws0612	Negative	195.07	121	196.074	C10H12O4	[M-H]-	-	3,4-Dimethoxyphenyl acetic acid	Phenolic acids	Phenolic acids	93-40-3	1	85541
pme0310	Negative	197.05	124.02	198.053	C9H10O5	[M-H]-	-	Ethyl gallate	Phenolic acids	Phenolic acids	831-61-8	1	2098500
Lmcn002982	Negative	197.05	167	198.053	C9H10O5	[M-H]-	-	Methyl 3-O-Methyl Gallate	Phenolic acids	Phenolic acids	3934-86-9	2	40750
mws0027	Negative	197.05	123	198.053	C9H10O5	[M-H]-	C10833	Syringic acid	Phenolic acids	Phenolic acids	530-57-4	1	1071700
pmb1587	Positive	207.14	165.2	206.131	C13H18O2	[M+H]+	-	4-Hydroxy-3,5-diisopropylbenzaldehyde	Phenolic acids	Phenolic acids	10537-86-7	2	6726.3
Lmbn013410	Negative	205.16	189.13	206.167	C14H22O	[M-H]-	-	2,4-Di-Tert-Butylphenol*	Phenolic acids	Phenolic acids	96-76-4	1	79936
MWS1877	Negative	205.16	133.06	206.167	C14H22O	[M-H]-	C14205	4-tert-Octylphenol	Phenolic acids	Phenolic acids	140-66-9	3	6508
Lmln010063	Negative	205.16	189.13	206.167	C14H22O	[M-H]-	-	2,6-Di-tert-butylphenol*	Phenolic acids	Phenolic acids	128-39-2	1	77877
MA10107783	Negative	207.03	119.05	208.037	C10H8O5	[M-H]-	C20772	3-[(1-Carboxyvinyl)oxy]benzoic acid	Phenolic acids	Phenolic acids	16929-37-6	2	166890
pme3443	Negative	207.07	192	208.074	C11H12O4	[M-H]-	C05610	Sinapinaldehyde	Phenolic acids	Phenolic acids	4206-58-0	3	576190
mws2184	Negative	207.07	135.1	208.074	C11H12O4	[M-H]-	-	Ethyl caffeate	Phenolic acids	Phenolic acids	102-37-4	2	20684
pmb2620	Negative	207.07	133.1	208.074	C11H12O4	[M-H]-	-	3,4-Dimethoxycinnamic acid	Phenolic acids	Phenolic acids	14737-89-4	2	97238
mws0853	Negative	209.08	179	210.089	C11H14O4	[M-H]-	C02325	Sinapyl alcohol	Phenolic acids	Phenolic acids	537-33-7	1	866990
Lmbn004790	Negative	209.08	179.03	210.089	C11H14O4	[M-H]-	-	Methyl 3-(3-hydroxy-4-methoxyphenyl)propanoate	Phenolic acids	Phenolic acids	129150-61-4	1	687920
pme3437	Positive	213.08	154.1	212.068	C10H12O5	[M+H]+	-	Eudesmic acid (3,4,5-trimethoxybenzoic acid)	Phenolic acids	Phenolic acids	118-41-2	2	316150
MWSmce355	Negative	211.06	181.01	212.2	C10H12O5	[M-H]-	-	Methyl syringate	Phenolic acids	Phenolic acids	884-35-5	3	16446
MWSmce177	Negative	221.09	133.03	222.24	C12H14O4	[M-H]-	-	Ethyl ferulate	Phenolic acids	Phenolic acids	4046-02-0	3	189550
mws4085	Negative	223.06	193	224.068	C11H12O5	[M-H]-	C00482	Sinapic acid	Phenolic acids	Phenolic acids	530-59-6	2	512390
Lmhn003240	Negative	237.04	121.03	238.048	C11H10O6	[M-H]-	-	Benzoylmalic acid	Phenolic acids	Phenolic acids	22138-51-8	2	40558000
Lmyn000160	Negative	237.06	87.01	238.069	C8H14O8	[M-H]-	-	Mucic acid Dimethyl Ester	Phenolic acids	Phenolic acids	-	3	158710
pmn001669	Negative	237.08	147	238.084	C12H14O5	[M-H]-	-	Methyl sinapate	Phenolic acids	Phenolic acids	20733-94-2	3	16158
pme0428	Negative	237.08	103	238.084	C12H14O5	[M-H]-	-	3,4,5-Trimethoxycinnamic acid	Phenolic acids	Phenolic acids	90-50-6	3	94829
Lmzn001925	Negative	239.09	195.1	240.1	C12H16O5	[M-H]-	-	3,4'-Dihydroxy-3'-methoxybenzenepentanoic acid	Phenolic acids	Phenolic acids	-	3	18258
Smrp001932	Positive	243.12	181.08	242.115	C12H18O5	[M+H]+	-	(2R)-3-(3',4',5'-trimethoxyphenyl)-1,2-propanediol	Phenolic acids	Phenolic acids	-	1	144490
Lmhn003373	Negative	253.04	137.02	254.043	C11H10O7	[M-H]-	-	p-Hydroxybenzoylmalic acid	Phenolic acids	Phenolic acids	-	2	8267600
pmp000086	Positive	269.1	177.05	268.095	C13H16O6	[M+H]+	-	1-Feruloyl-sn-glycerol*	Phenolic acids	Phenolic acids	-	3	108680
pmp000087	Positive	269.1	177.05	268.095	C13H16O6	[M+H]+	-	2-Feruloyl-sn-glycerol*	Phenolic acids	Phenolic acids	-	3	520370
mws0905	Negative	269.08	209	270.089	C16H14O4	[M-H]-	C10503	Medicarpin	Phenolic acids	Phenolic acids	32383-76-9	1	50813
mws1297	Negative	269.1	101.02	270.11	C13H18O6	[M-H]-	-	Benzyl glucoside	Phenolic acids	Phenolic acids	4304-12-5	2	17279
pme3472	Negative	271.09	107.6	272.09	C12H16O7	[M-H]-	C06186	Arbutin	Phenolic acids	Phenolic acids	497-76-7	3	128750
MWSmce675	Negative	271.08	108.02	272.25	C12H16O7	[M-H]-	-	α-Arbutin	Phenolic acids	Phenolic acids	84380-01-8	3	78924
Lmlp012720	Positive	279.16	149.02	278.152	C16H22O4	[M+H]+	C14214	Dibutyl phthalate	Phenolic acids	Phenolic acids	84-74-2	1	8882000
Lmhn002926	Negative	279.05	163.04	280.058	C13H12O7	[M-H]-	-	p-Coumaroylmalic acid	Phenolic acids	Phenolic acids	-	3	19801
Lmhn003223	Negative	279.05	147.04	280.058	C13H12O7	[M-H]-	-	Cinnamoyltartaric acid	Phenolic acids	Phenolic acids	-	3	27911
Hmqp002567	Positive	284.13	147.04	283.12	C17H17NO3	[M+H]+	-	P-Hydroxycinnamic acid p-hydroxyphenethylamine	Phenolic acids	Phenolic acids	-	3	7290
mws1505	Negative	283.1	135	284.105	C17H16O4	[M-H]-	C10484	Phenethyl caffeate	Phenolic acids	Phenolic acids	104594-70-9	2	10244
Lmyn003835	Negative	289.04	137.02	290.043	C14H10O7	[M-H]-	-	4-(3,4,5-Trihydroxybenzoxy)benzoic acid	Phenolic acids	Phenolic acids	-	2	72904
mws2120	Negative	291.01	247.02	292.022	C13H8O8	[M-H]-	-	Brevifolin carboxylic acid	Phenolic acids	Phenolic acids	18490-95-4	1	947710
HJAP140	Positive	299.08	284.07	298.084	C17H14O5	[M+H]+	-	Puerol A	Phenolic acids	Phenolic acids	152784-32-2	1	2779200
Lmhn001386	Negative	299.04	167.03	300.048	C12H12O9	[M-H]-	-	Vnilloyltartaric acid	Phenolic acids	Phenolic acids	-	3	40994
pmb3142	Negative	299.1	137.1	300.085	C13H16O8	[M-H]-	-	Salicylic acid-2-O-glucoside	Phenolic acids	Phenolic acids	10366-91-3	3	1323500
Hmtn001302	Negative	299.08	137.02	300.085	C13H16O8	[M-H]-	-	Glucosyloxybenzoic acid	Phenolic acids	Phenolic acids	-	3	4269200
Hmyn001360	Negative	299.11	59.01	300.135	C18H20O4	[M-H]-	-	Doitungbiphenyl A	Phenolic acids	Phenolic acids	-	3	267490
Hmqn000843	Negative	301.09	123.01	302.1	C13H18O8	[M-H]-	-	3-Methoxy-4-hydroxyphenol-1-O-β-D-glucoside (Tachioside)	Phenolic acids	Phenolic acids	109194-60-7	2	198660
Lmhn003074	Negative	309.06	193.05	310.069	C14H14O8	[M-H]-	-	Feruloylmalic acid	Phenolic acids	Phenolic acids	-	3	75349
Lmhn001477	Negative	311.04	179.04	312.048	C13H12O9	[M-H]-	-	2-Caffeoyl-L-tartaric acid (Caftaric acid)	Phenolic acids	Phenolic acids	67879-58-7	3	47028
Lmsn002887	Negative	311.08	163.04	312.085	C14H16O8	[M-H]-	-	1-O-Caffeoyl xylose	Phenolic acids	Phenolic acids	-	3	11980
Lmqp002761	Positive	313.14	151.08	312.136	C19H20O4	[M+H]+	-	Alnusonol	Phenolic acids	Phenolic acids	52330-12-8	3	49561
Lmyn002403	Negative	313.09	101.02	314.1	C14H18O8	[M-H]-	-	Mandelic acid-β-glucoside	Phenolic acids	Phenolic acids	-	1	1016500
pmn001367	Negative	315.07	153.02	316.079	C13H16O9	[M-H]-	-	Protocatechuic acid-4-O-glucoside	Phenolic acids	Phenolic acids	-	1	251840
pmb2871	Negative	315.07	153	316.079	C13H16O9	[M-H]-	-	1-O-Gentisoyl-D-glucoside	Phenolic acids	Phenolic acids	23445-11-6	1	266990
Zmtn001661	Negative	315.11	153.02	316.116	C14H20O8	[M-H]-	-	Vanilloloside	Phenolic acids	Phenolic acids	74950-96-2	2	300640
pmn001513	Negative	321	125	322.021	C14H10O9	[M-H]-	C01572	Digallic Acid	Phenolic acids	Phenolic acids	536-08-3	1	2099000
pmn001515	Negative	325.06	93	326.064	C14H14O9	[M-H]-	-	3-Galloylshikimic acid	Phenolic acids	Phenolic acids	110082-91-2	3	6410.4
Hmhn003067	Negative	325.09	119.05	326.1	C15H18O8	[M-H]-	-	Phenylpropionic acid-O-β-D-glucopyranoside	Phenolic acids	Phenolic acids	-	3	4739100
Zmhn002301	Negative	325.09	163.04	326.1	C15H18O8	[M-H]-	C06739	p-Coumaric acid-4-O-glucoside	Phenolic acids	Phenolic acids	117405-48-8	2	3438200
mws1627	Negative	327.07	207.2	328.079	C14H16O9	[M-H]-	C09919	Bergenin	Phenolic acids	Phenolic acids	477-90-7	2	7162.8
Lmtn002233	Negative	327.11	165.06	328.116	C15H20O8	[M-H]-	-	Androsin	Phenolic acids	Phenolic acids	531-28-2	2	2046400
pmn001690	Negative	327.14	165.09	328.152	C16H24O7	[M-H]-	-	3-Hydroxy-4-isopropylbenzylalcohol-3-O-glucoside	Phenolic acids	Phenolic acids	-	3	48616
Smhn002346	Negative	329.08	167.03	330.095	C14H18O9	[M-H]-	-	2,4,6-trihydroxy-acetophenone-6-O-b-D-glucopyranoside *	Phenolic acids	Phenolic acids	-	1	2376600
Lmmn003663	Negative	329.09	167.04	330.095	C14H18O9	[M-H]-	-	5-Glucosyloxy-2-Hydroxybenzoic acid methyl ester	Phenolic acids	Phenolic acids	-	3	51044
Lmtn002565	Negative	329.11	167.03	330.095	C14H18O9	[M-H]-	C20470	1-O-Vanilloyl-D-Glucose	Phenolic acids	Phenolic acids	-	3	54259
Smhn102346	Negative	329.08	167.03	330.095	C14H18O9	[M-H]-	-	2,4,6-trihydroxy-acetophenone-4-O-b-D-glucopyranoside *	Phenolic acids	Phenolic acids	-	1	2409600
Zmhn001883	Negative	329.09	209.04	330.095	C14H18O9	[M-H]-	-	Vanillic acid-4-O-glucoside	Phenolic acids	Phenolic acids	32142-31-7	3	166500
pmn001517	Negative	329.12	167	330.131	C15H22O8	[M-H]-	-	3,4,5-Trimethoxyphenyl-1-O-Glucoside	Phenolic acids	Phenolic acids	-	3	5196000
pmn001518	Negative	331.07	169.01	332.074	C13H16O10	[M-H]-	C01158	1-O-Galloyl-β-D-glucose	Phenolic acids	Phenolic acids	58511-73-2	1	1123800
Lmmn001294	Negative	331.1	153.02	332.111	C14H20O9	[M-H]-	-	Koaburaside	Phenolic acids	Phenolic acids	41653-73-0	1	735520
Jmwn002117	Negative	331.1	153.02	332.111	C14H20O9	[M-H]-	-	2-(3,4-dihydroxyphenyl)ethanediol 1-O-β-D-glucopyranoside	Phenolic acids	Phenolic acids	-	1	858130
pmn001519	Negative	335.04	124	336.048	C15H12O9	[M-H]-	-	Galloyl Methyl gallate	Phenolic acids	Phenolic acids	-	3	757180
pmb3074	Negative	337.09	191.05	338.1	C16H18O8	[M-H]-	C12208	5-O-p-Coumaroylquinic acid*	Phenolic acids	Phenolic acids	1899-30-5	1	4128000
pmn001421	Negative	337.09	191.05	338.1	C16H18O8	[M-H]-	-	3-O-p-Coumaroylquinic acid*	Phenolic acids	Phenolic acids	87099-71-6	1	4053900
Hmcn004128	Negative	339.11	159.04	340.116	C16H20O8	[M-H]-	-	P-Methoyxcinnamate glucoside	Phenolic acids	Phenolic acids	-	3	72010
Zmhn001793	Negative	341.09	179.03	342.096	C15H18O9	[M-H]-	-	6-O-Caffeoyl-D-glucose	Phenolic acids	Phenolic acids	-	2	2511900
mws0906	Negative	341.12	179	342.131	C16H22O8	[M-H]-	C00761	Coniferyl alcohol-4-O-glucoside (Coniferin)	Phenolic acids	Phenolic acids	531-29-3	2	2051500
Lmmn000774	Negative	343.1	181.05	344.111	C15H20O9	[M-H]-	-	Dihydrocaffeoylglucose	Phenolic acids	Phenolic acids	-	3	76407
Zmln000899	Negative	343.11	181.05	344.111	C15H20O9	[M-H]-	-	Syringaldehyde-4-O-glucoside	Phenolic acids	Phenolic acids	-	2	14219
Lmyp003381	Positive	347.13	301.13	346.126	C15H22O9	[M+H]+	-	3,4,5-Trimethoxyphenyl-1-O-β-D-glucopyranoside	Phenolic acids	Phenolic acids	-	3	199840
pme1816	Negative	353.09	191	354.095	C16H18O9	[M-H]-	C17147	Neochlorogenic acid (5-O-Caffeoylquinic acid)	Phenolic acids	Phenolic acids	906-33-2	1	73945
Zmhn002334	Negative	355.1	193.05	356.111	C16H20O9	[M-H]-	-	6-O-Feruloyl-D-glucose	Phenolic acids	Phenolic acids	137887-25-3	2	899520
pmb3107	Negative	359.1	182.1	360.106	C15H20O10	[M-H]-	-	Glucosyringic Acid	Phenolic acids	Phenolic acids	-	1	1685500
pmn001657	Negative	365.2	167.1	366.204	C20H30O6	[M-H]-	-	Dehydrocinnzeylanol	Phenolic acids	Phenolic acids	-	2	4339
mws0179	Negative	367.1	190.9	368.111	C17H20O9	[M-H]-	-	Chlorogenic acid methyl ester	Phenolic acids	Phenolic acids	29708-87-0	3	4422800
pmb0752	Positive	369.12	177.1	368.111	C17H20O9	[M+H]+	C02572	3-O-Feruloylquinic acid	Phenolic acids	Phenolic acids	1899-29-2	1	225610
pmn001695	Negative	371.1	249.06	372.106	C16H20O10	[M-H]-	-	Trihydroxycinnamoylquinic acid	Phenolic acids	Phenolic acids	-	2	649540
mws0011	Negative	371.13	209	372.142	C17H24O9	[M-H]-	C01533	Syringin	Phenolic acids	Phenolic acids	118-34-3	3	104900
pmb0108	Positive	375.2	137.1	374.1	C19H18O8	[M+H]+	-	Feruloyl syringic acid	Phenolic acids	Phenolic acids	-	3	34459
Hmbn005951	Negative	383.12	163.04	384.121	C21H20O7	[M-H]-	-	1,3-O-Di-p-Coumaroylglycerol	Phenolic acids	Phenolic acids	-	3	18291
Zmhn002227	Negative	385.11	223.06	386.121	C17H22O10	[M-H]-	C02919	Sinapoyl-4-O-glucoside	Phenolic acids	Phenolic acids	-	3	477720
Jmbp006554	Positive	389.12	359.07	388.116	C20H20O8	[M+H]+	-	ethyl rosmarinate	Phenolic acids	Phenolic acids	-	3	9787.7
Lmzn001582	Negative	387.17	207.1	388.174	C18H28O9	[M-H]-	-	5'-Glucosyloxyjasmanic acid	Phenolic acids	Phenolic acids	-	3	317310
Lmwp011196	Positive	391.28	149.02	390.277	C24H38O4	[M+H]+	C03690	Bis(2-ethylhexyl)phthalate	Phenolic acids	Phenolic acids	117-81-7	2	2543300
Lmmp010562	Positive	391.28	149.02	390.277	C24H38O4	[M+H]+	C14577	Diisooctyl Phthalate	Phenolic acids	Phenolic acids	27554-26-3	2	3026500
Lmhn002573	Negative	399.09	205.04	400.101	C17H20O11	[M-H]-	-	Sinapoylglucuronic acid	Phenolic acids	Phenolic acids	-	2	60062
Cmjn004337	Negative	401.14	269.1	402.153	C18H26O10	[M-H]-	-	Benzyl-(2''-O-xylosyl)glucoside	Phenolic acids	Phenolic acids	-	3	95917
pmn001350	Negative	407.13	245.1	408.142	C20H24O9	[M-H]-	-	Torachrysone-8-O-glucoside	Phenolic acids	Phenolic acids	64032-49-1	2	8336
Lmtp003575	Positive	418.14	134.06	417.142	C21H23NO8	[M+H]+	-	Prupersin F	Phenolic acids	Phenolic acids	-	2	222460
Cmbn003996	Negative	429.14	193.05	430.147	C19H26O11	[M-H]-	-	Regaloside G	Phenolic acids	Phenolic acids	120601-64-1	2	17905
Lmtn002324	Negative	431.15	269.1	432.163	C19H28O11	[M-H]-	C17564	Benzyl-(2''-O-glucosyl)glucoside	Phenolic acids	Phenolic acids	-	2	616530
Lmyn003028	Negative	431.16	269.1	432.163	C19H28O11	[M-H]-	-	Benzyl-β-gentiobioside	Phenolic acids	Phenolic acids	56775-64-5	2	564630
pmn001521	Negative	437.11	313.1	438.116	C20H22O11	[M-H]-	-	3-Hydroxy-5-Methylphenol-1-O-(6'-Galloyl)Glucoside	Phenolic acids	Phenolic acids	-	3	4270.4
Hmbp006861	Positive	445.15	177.05	444.142	C23H24O9	[M+H]+	-	1,2-O-Diferuloylglycerol	Phenolic acids	Phenolic acids	-	3	22784
pmp000091	Positive	445.15	177.05	444.142	C23H24O9	[M+H]+	-	1,3-O-Diferuloylglycerol	Phenolic acids	Phenolic acids	83008-46-2	3	27836
Li512113	Negative	451.09	391.04	452.095	C20H20O12	[M-H]-	-	Maleoyl-caffeoylquinic acid	Phenolic acids	Phenolic acids	-	3	35017
HJN093	Negative	451.09	313.05	452.095	C20H20O12	[M-H]-	-	2-O-Salicyl-6-O-Galloyl-D-Glucose	Phenolic acids	Phenolic acids	-	3	46770
mad2085	Negative	457.08	295.04	458.085	C22H18O11	[M-H]-	-	Caffeoyl-p-coumaroyltartaric acid	Phenolic acids	Phenolic acids	-	3	121880
Lmhn002683	Negative	457.08	163.04	458.085	C22H18O11	[M-H]-	-	p-Coumaroylcaffeoyltartaric acid	Phenolic acids	Phenolic acids	-	3	65359
pmb2654	Negative	460.1	117.9	461.153	C19H27NO12	[M-H]-	-	Anthranilate-1-O-Sophoroside	Phenolic acids	Phenolic acids	-	3	4194900
Lmhn002321	Negative	461.07	167.04	462.08	C21H18O12	[M-H]-	-	Vnilloylcaffeoyltartaric acid	Phenolic acids	Phenolic acids	-	3	56395
Zmhn004909	Negative	477.06	169.01	478.075	C21H18O13	[M-H]-	-	3,4-Digalloylshikimic acid	Phenolic acids	Phenolic acids	-	3	36097
pmn001628	Negative	481.06	275	482.07	C20H18O14	[M-H]-	-	4,6-(S)-Hexahydroxydiphenoyl-D-glucose	Phenolic acids	Phenolic acids	23094-68-0	3	26103
pmb3072	Negative	481.14	319.3	482.142	C22H26O12	[M-H]-	-	3-O-p-Coumaroylshikimic acid-O-glucoside*	Phenolic acids	Phenolic acids	-	3	545120
pmb3066	Negative	481.14	319.2	482.142	C22H26O12	[M-H]-	-	5-O-p-Coumaroylshikimic acid O-glucoside*	Phenolic acids	Phenolic acids	-	3	121170
Zmln000668	Negative	493.12	169.01	494.127	C19H26O15	[M-H]-	-	Monogalloyl-diglucose	Phenolic acids	Phenolic acids	-	2	2967600
Lmgp003989	Positive	499.13	163.04	498.116	C25H22O11	[M+H]+	-	Dicaffeoylshikimic acid	Phenolic acids	Phenolic acids	-	3	230040
pmb3061	Negative	499.15	163.1	500.153	C22H28O13	[M-H]-	-	5-O-p-Coumaroylquinic acid O-glucoside*	Phenolic acids	Phenolic acids	-	3	32000
pmb3064	Negative	499.15	163.2	500.153	C22H28O13	[M-H]-	-	3-O-p-Coumaroylquinic acid-O-glucoside*	Phenolic acids	Phenolic acids	-	3	28602
pmb3055	Negative	513.1	191.1	514.132	C22H26O14	[M-H]-	-	p-Coumaroylquinic acid-4'-O-glucuronide	Phenolic acids	Phenolic acids	-	3	43573
Li512115	Negative	515.12	353.09	516.127	C25H24O12	[M-H]-	C10468	Isochlorogenic acid B*	Phenolic acids	Phenolic acids	14534-61-3	1	2166400
pmn001384	Negative	515.12	353.09	516.127	C25H24O12	[M-H]-	-	Isochlorogenic acid C*	Phenolic acids	Phenolic acids	57378-72-0	2	606190
Wmzn002116	Negative	515.12	353.09	516.127	C25H24O12	[M-H]-	-	3,5-Dicaffeoylquinic acid	Phenolic acids	Phenolic acids	-	3	909450
pmn001382	Negative	515.12	353.09	516.127	C25H24O12	[M-H]-	-	Isochlorogenic acid A*	Phenolic acids	Phenolic acids	2450-53-5	2	571540
MWSmce346	Positive	517.13	163.04	516.45	C25H24O12	[M+H]+	C10445	1,3-Dicaffeoylquinic acid	Phenolic acids	Phenolic acids	19870-46-3	1	740570
Lmhn003246	Negative	517.1	223.06	518.106	C24H22O13	[M-H]-	-	Sinapoylcaffeoyltartaric acid	Phenolic acids	Phenolic acids	-	3	10629
Hmbn002692	Negative	517.16	175.04	518.164	C22H30O14	[M-H]-	-	6'-O-Feruloyl-D-sucrose	Phenolic acids	Phenolic acids	118230-77-6	2	776260
pmn001710	Negative	521.13	359.08	522.137	C24H26O13	[M-H]-	-	Rosmarinic acid-3'-O-glucoside	Phenolic acids	Phenolic acids	910028-78-3	3	50781
Zmcn005156	Negative	529.13	353.08	530.142	C26H26O12	[M-H]-	-	4,5-O-Dicaffeoylquinic Acid Methyl Ester	Phenolic acids	Phenolic acids	-	3	27873
pmb2833	Negative	529.16	193.1	530.164	C23H30O14	[M-H]-	-	3-O-Feruloylquinic acid-O-glucoside	Phenolic acids	Phenolic acids	-	2	37572
pmb2554	Negative	529.16	193.1	530.164	C23H30O14	[M-H]-	-	5-O-Feruloyl quinic acid glucoside	Phenolic acids	Phenolic acids	-	2	42433
Lmhn003801	Negative	531.12	337.06	532.122	C25H24O13	[M-H]-	-	Feruloylsinapoyltartaric acid	Phenolic acids	Phenolic acids	-	3	54413
pmb0824	Positive	537.1	177.4	536.153	C25H28O13	[M+H]+	-	Syringic acid-4-O-(6''-feruloyl)glucoside	Phenolic acids	Phenolic acids	-	3	17193
Lmtn004500	Negative	535.17	121.03	536.189	C26H32O12	[M-H]-	-	Prupersin C	Phenolic acids	Phenolic acids	-	3	4236.4
pmn001672	Negative	547.17	223.1	548.174	C23H32O15	[M-H]-	-	Furanofructosyl-α-D-(3-mustard acyl)glucoside*	Phenolic acids	Phenolic acids	-	2	202550
pmn001671	Negative	547.17	223.1	548.174	C23H32O15	[M-H]-	-	Furanofructosyl-α-D-(6-mustard acyl)glucoside*	Phenolic acids	Phenolic acids	-	2	161840
Lmsn003628	Negative	547.17	223.06	548.174	C23H32O15	[M-H]-	-	6′-O-Sinapoylsucrose	Phenolic acids	Phenolic acids	-	2	13542
Lmtn004273	Negative	549.22	121	550.169	C26H30O13	[M-H]-	-	Prupersin D	Phenolic acids	Phenolic acids	-	3	11103
Lmtp003081	Positive	563.19	430.14	562.18	C26H30N2O12	[M+H]+	-	Prupersin E	Phenolic acids	Phenolic acids	-	3	94319
N2828	Negative	599.16	299.08	600.184	C30H32O13	[M-H]-	-	Mudanpioside C	Phenolic acids	Phenolic acids	172760-03-1	3	7916700
Jmwn004308	Negative	637.21	475.16	638.221	C30H38O15	[M-H]-	-	4-Dihydroxyphenethoxy-8-O-β-D-[6-O-(4-O-β-D-glucopyranosyl)-feruloyl]glucopyranoside	Phenolic acids	Phenolic acids	-	2	2271000
Hmln002996	Negative	639.19	621.18	640.201	C29H36O16	[M-H]-	C17528	β-Hydroxyacteoside	Phenolic acids	Phenolic acids	95587-86-3	3	23239
pmn001533	Negative	645.13	169	646.138	C26H30O19	[M-H]-	-	2-O-Di-gallic acyl-Glucoside-Glucoside	Phenolic acids	Phenolic acids	-	2	28264
pmb2819	Negative	665.1	218.1	666.201	C27H38O19	[M-H]-	-	O-Caffeoyl maltotriose	Phenolic acids	Phenolic acids	-	3	5630.1
Lmgn002250	Negative	677.17	191.06	678.18	C31H34O17	[M-H]-	-	Dicaffeoylquinic acid-O-glucoside	Phenolic acids	Phenolic acids	-	2	150240
Lmgn002253	Negative	695.2	353.09	696.19	C31H36O18	[M-H]-	-	Syringoylcaffeoylquinic acid-D-glucose	Phenolic acids	Phenolic acids	-	2	2596600
mws1150	Negative	785.25	623.2	786.258	C35H46O20	[M-H]-	C10450	Echinacoside	Phenolic acids	Phenolic acids	82854-37-3	2	250890
pmn001534	Negative	787.1	617.08	788.107	C34H28O22	[M-H]-	C04516	1,2,3,6-Tetra-O-Galloyl-D-Glucose	Phenolic acids	Phenolic acids	79886-50-3	2	36854
pmn001613	Negative	959.28	753.22	960.29	C45H52O23	[M-H]-	-	(3,4-Dimustard acyl)-fructosyl-α-D-(6-mustard acyl)glucoside	Phenolic acids	Phenolic acids	-	3	5601.1
MWS5173	Positive	112.05	70.03	111.043	C4H5N3O	[M+H]+	-	Isocytosine*	Nucleotides and derivatives	Nucleotides and derivatives	108-53-2	2	808860
mws0255	Positive	112.05	95	111.043	C4H5N3O	[M+H]+	C00380	Cytosine*	Nucleotides and derivatives	Nucleotides and derivatives	71-30-7	1	875670
pme0257	Negative	111.02	80	112.027	C4H4N2O2	[M-H]-	C00106	Uracil	Nucleotides and derivatives	Nucleotides and derivatives	66-22-8	3	22700
pme0151	Positive	115	98.2	114.043	C4H6N2O2	[M+H]+	C00429	5,6-Dihydrouracil	Nucleotides and derivatives	Nucleotides and derivatives	504-07-4	3	6077.7
mws0572	Positive	126.07	109	125.059	C5H7N3O	[M+H]+	C02376	5-Methylcytosine	Nucleotides and derivatives	Nucleotides and derivatives	554-01-8	3	183630
mws0251	Positive	127.05	110	126.043	C5H6N2O2	[M+H]+	C00178	Thymine	Nucleotides and derivatives	Nucleotides and derivatives	65-71-4	3	115620
pme0040	Positive	136.06	119	135.054	C5H5N5	[M+H]+	C00147	Adenine	Nucleotides and derivatives	Nucleotides and derivatives	73-24-5	1	1170900
pmb0374	Positive	136.06	118.9	135.054	C5H5N5	[M+H]+	-	2-Aminopurine	Nucleotides and derivatives	Nucleotides and derivatives	452-06-2	1	2021800
pme0033	Positive	137.05	119	136.039	C5H4N4O	[M+H]+	C00262	Hypoxanthine	Nucleotides and derivatives	Nucleotides and derivatives	68-94-0	1	2386600
pme1173	Positive	137.05	110	136.039	C5H4N4O	[M+H]+	-	Allopurinol	Nucleotides and derivatives	Nucleotides and derivatives	315-30-0	1	3694000
pme2879	Negative	141	123	142.038	C5H6N2O3	[M-H]-	C03088	5-Hydroxymethyluracil	Nucleotides and derivatives	Nucleotides and derivatives	4433-40-3	3	46433
mws0847	Positive	150.08	133	149.07	C6H7N5	[M+H]+	C02216	1-Methyladenine	Nucleotides and derivatives	Nucleotides and derivatives	5142-22-3	1	385300
pme0183	Positive	152.06	135	151.049	C5H5N5O	[M+H]+	-	Isoguanine*	Nucleotides and derivatives	Nucleotides and derivatives	3373-53-3	1	67782
pme1109	Positive	152.06	135	151.049	C5H5N5O	[M+H]+	C00242	Guanine*	Nucleotides and derivatives	Nucleotides and derivatives	73-40-5	1	4144400
pme0256	Negative	151.03	151	152.033	C5H4N4O2	[M-H]-	C00385	Xanthine	Nucleotides and derivatives	Nucleotides and derivatives	69-89-6	1	684590
MWS2984	Positive	153.05	136.03	152.045	C4H4N6O	[M+H]+	-	8-Azaguanine	Nucleotides and derivatives	Nucleotides and derivatives	134-58-7	2	722150
MWSslk102	Positive	155.01	119.04	154.56	C5H3ClN4	[M+H]+	-	6-Chloropurine	Nucleotides and derivatives	Nucleotides and derivatives	87-42-3	3	17050
mws1641	Positive	165.04	120.02	164.033	C6H4N4O2	[M+H]+	C03212	Lumazine	Nucleotides and derivatives	Nucleotides and derivatives	487-21-8	3	216140
MWS4525	Positive	166.07	124.05	165.065	C6H7N5O	[M+H]+	-	6-O-methylguanine	Nucleotides and derivatives	Nucleotides and derivatives	20535-83-5	1	803260
pme3968	Positive	166.07	149.05	165.065	C6H7N5O	[M+H]+	C02242	7-Methylguanine	Nucleotides and derivatives	Nucleotides and derivatives	578-76-7	1	267730
pmc0274	Positive	167.1	121.1	166.031	C6H6N4S	[M+H]+	C16614	6-Methylmercaptopurine	Nucleotides and derivatives	Nucleotides and derivatives	50-66-8	3	4560500
Cmdn000784	Negative	167.02	124.01	168.028	C5H4N4O3	[M-H]-	-	Uric acid	Nucleotides and derivatives	Nucleotides and derivatives	69-93-2	3	8595.9
mws0981	Negative	178.04	136.02	179.044	C6H5N5O2	[M-H]-	C03975	Isoxanthopterin	Nucleotides and derivatives	Nucleotides and derivatives	529-69-1	2	38087
mws0663	Positive	181.07	124	180.065	C7H8N4O2	[M+H]+	C13747	1,7-Dimethylxanthine	Nucleotides and derivatives	Nucleotides and derivatives	611-59-6	3	13255
pme2060	Positive	204.25	136	203.117	C10H13N5	[M+H]+	C04083	N6-Isopentenyladenine	Nucleotides and derivatives	Nucleotides and derivatives	2365-40-4	3	38431
pmb2507	Negative	213.1	97	214.024	C5H11O7P	[M-H]-	C00672	2-Deoxyribose-1-phosphate	Nucleotides and derivatives	Nucleotides and derivatives	17210-42-3	3	655370
pme1194	Positive	228.1	112	227.091	C9H13N3O4	[M+H]+	C00881	2'-Deoxycytidine	Nucleotides and derivatives	Nucleotides and derivatives	951-77-9	1	4059500
pme3882	Negative	227.07	184	228.075	C9H12N2O5	[M-H]-	C00526	2'-Deoxyuridine	Nucleotides and derivatives	Nucleotides and derivatives	951-78-0	3	47500
MWStz100	Positive	229.09	113.04	228.21	C8H12N4O4	[M+H]+	-	5-Aza-2'-deoxycytidine	Nucleotides and derivatives	Nucleotides and derivatives	2353-33-5	3	171010
mws0984	Negative	236.08	164.06	237.086	C9H11N5O3	[M-H]-	C00835	L-Sepiapterin	Nucleotides and derivatives	Nucleotides and derivatives	17094-01-8	2	65635
HJAP106	Positive	242.1	136.06	241.096	C12H11N5O	[M+H]+	-	N6-(4-hydroxybenzyl)adnine riboside	Nucleotides and derivatives	Nucleotides and derivatives	-	3	41271
MWS2910	Positive	242.11	126.07	241.106	C10H15N3O4	[M+H]+	C03592	5-Methyl-2'-deoxycytidine	Nucleotides and derivatives	Nucleotides and derivatives	838-07-3	3	2274600
pme0264	Positive	243.1	127	242.09	C10H14N2O5	[M+H]+	C00214	Thymidine	Nucleotides and derivatives	Nucleotides and derivatives	50-89-5	1	3439700
ML10180524	Positive	244.09	112.05	243.086	C9H13N3O5	[M+H]+	C02961	Cytarabine	Nucleotides and derivatives	Nucleotides and derivatives	147-94-4	1	7737900
pme3732	Positive	244.09	112	243.086	C9H13N3O5	[M+H]+	C00475	Cytidine	Nucleotides and derivatives	Nucleotides and derivatives	65-46-3	1	592390
mws0248	Negative	243.06	110	244.07	C9H12N2O6	[M-H]-	C00299	Uridine	Nucleotides and derivatives	Nucleotides and derivatives	58-96-8	1	3685000
mws0976	Negative	243.06	153	244.07	C9H12N2O6	[M-H]-	C02067	β-Pseudouridine	Nucleotides and derivatives	Nucleotides and derivatives	1445-07-4	3	466670
MWSmce295	Positive	245.07	113.03	244.2	C9H12N2O6	[M+H]+	C16908	1-beta-D-Arabinofuranosylurac​il	Nucleotides and derivatives	Nucleotides and derivatives	3083-77-0	2	291100
pme3961	Positive	252.11	136	251.102	C10H13N5O3	[M+H]+	C00559	2'-Deoxyadenosine	Nucleotides and derivatives	Nucleotides and derivatives	958-09-8	1	23067000
mws1715	Positive	252.11	69	251.102	C10H13N5O3	[M+H]+	C08431	Cordycepin (3'-Deoxyadenosine)	Nucleotides and derivatives	Nucleotides and derivatives	73-03-0	1	274680
pme2776	Positive	253.09	137	252.086	C10H12N4O4	[M+H]+	C05512	2'-Deoxyinosine	Nucleotides and derivatives	Nucleotides and derivatives	890-38-0	3	2929700
pme1187	Negative	257.08	124	258.085	C10H14N2O6	[M-H]-	-	5-Methyluridine	Nucleotides and derivatives	Nucleotides and derivatives	1463-10-1	3	38922
pme1184	Positive	268.1	152	267.097	C10H13N5O4	[M+H]+	C00330	2'-Deoxyguanosine	Nucleotides and derivatives	Nucleotides and derivatives	961-07-9	1	21789000
pme0230	Positive	268.1	136.06	267.097	C10H13N5O4	[M+H]+	C00212	Adenosine	Nucleotides and derivatives	Nucleotides and derivatives	58-61-7	1	18100000
mws1060	Negative	267.07	135	268.081	C10H12N4O5	[M-H]-	-	9-(Arabinosyl)hypoxanthine	Nucleotides and derivatives	Nucleotides and derivatives	7013-16-3	1	47184000
Hmhp001812	Positive	282.12	136.06	281.112	C11H15N5O4	[M+H]+	-	2'-O-Methyladenosine	Nucleotides and derivatives	Nucleotides and derivatives	2140-79-6	1	10614000
mws0872	Negative	280.11	148	281.112	C11H15N5O4	[M-H]-	C02494	1-Methyladenosine*	Nucleotides and derivatives	Nucleotides and derivatives	15763-06-1	2	51151
MWS4354	Positive	282.12	150.08	281.112	C11H15N5O4	[M+H]+	-	N6-methyladenosine*	Nucleotides and derivatives	Nucleotides and derivatives	1867-73-8	2	5636200
pme3350	Positive	284.1	168	283.092	C10H13N5O5	[M+H]+	-	8-Hydroxy-2-deoxyguanosine	Nucleotides and derivatives	Nucleotides and derivatives	88847-89-6	3	14236
pme1178	Positive	284.1	152	283.092	C10H13N5O5	[M+H]+	C00387	Guanosine	Nucleotides and derivatives	Nucleotides and derivatives	118-00-3	1	34890000
mws0668	Negative	283.07	151	284.076	C10H12N4O6	[M-H]-	C01762	Xanthosine	Nucleotides and derivatives	Nucleotides and derivatives	146-80-5	1	9149000
Lmqp000329	Positive	296.07	104.11	295.056	C8H14N3O7P	[M+H]+	-	5-Aminoimidazole ribonucleotide	Nucleotides and derivatives	Nucleotides and derivatives	25635-88-5	1	1654400
pme1474	Positive	298.1	136	297.09	C11H15N5O3S	[M+H]+	C00170	5'-Deoxy-5'-(methylthio)adenosine	Nucleotides and derivatives	Nucleotides and derivatives	2457-80-9	1	17600000
pmb0197	Positive	298.1	166.3	297.107	C11H15N5O5	[M+H]+	C20674	N7-Methylguanosine	Nucleotides and derivatives	Nucleotides and derivatives	20244-86-4	3	952050
mws0724	Negative	298.08	208	299.087	C10H13N5O6	[M-H]-	-	8-Hydroxyguanosine	Nucleotides and derivatives	Nucleotides and derivatives	3868-31-3	2	42687
pme1373	Negative	306.05	110	307.057	C9H14N3O7P	[M-H]-	C00239	2'-Deoxycytidine-5'-monophosphate	Nucleotides and derivatives	Nucleotides and derivatives	1032-65-1	3	38802
Lmcp002302	Positive	312.13	180.09	311.123	C12H17N5O5	[M+H]+	-	N6-(2-Hydroxyethyl)adenosine	Nucleotides and derivatives	Nucleotides and derivatives	4338-48-1	1	6863800
pme3967	Positive	312.13	180	311.123	C12H17N5O5	[M+H]+	-	2-(Dimethylamino)guanosine	Nucleotides and derivatives	Nucleotides and derivatives	2140-67-2	1	7099900
pme3174	Positive	324.06	112	323.052	C9H14N3O8P	[M+H]+	C00055	Cytidine 5'-monophosphate(Cytidylic acid)	Nucleotides and derivatives	Nucleotides and derivatives	63-37-6	3	333680
pme3188	Negative	323.03	211	324.036	C9H13N2O9P	[M-H]-	C00105	Uridine 5'-monophosphate	Nucleotides and derivatives	Nucleotides and derivatives	58-97-9	1	2549600
mws0884	Negative	328.05	134.2	329.053	C10H12N5O6P	[M-H]-	C00575	Cyclic 3',5'-Adenylic acid	Nucleotides and derivatives	Nucleotides and derivatives	60-92-4	1	3045100
pme3184	Positive	332.08	136	331.068	C10H14N5O6P	[M+H]+	C00360	2'-Deoxyadenosine-5'-monophosphate	Nucleotides and derivatives	Nucleotides and derivatives	653-63-4	1	108930
pmf0289	Positive	336.17	148	335.159	C15H21N5O4	[M+H]+	C16427	Riboprine	Nucleotides and derivatives	Nucleotides and derivatives	7724-76-7	3	439650
mws0609	Negative	344.04	150	345.047	C10H12N5O7P	[M-H]-	C00942	Guanosine 3',5'-cyclic monophosphate	Nucleotides and derivatives	Nucleotides and derivatives	7665-99-8	1	3207200
pmb0981	Positive	348.07	136	347.063	C10H14N5O7P	[M+H]+	C00020	Adenosine 5'-monophosphate	Nucleotides and derivatives	Nucleotides and derivatives	61-19-8	1	10461000
mws0874	Negative	346.06	210.9	347.063	C10H14N5O7P	[M-H]-	C01367	3'-Adenylic Acid	Nucleotides and derivatives	Nucleotides and derivatives	84-21-9	1	210150
pmb0532	Positive	349.05	137.3	348.047	C10H13N4O8P	[M+H]+	C00130	Inosine 5'-monophosphate	Nucleotides and derivatives	Nucleotides and derivatives	131-99-7	3	751750
pmb0998	Positive	364.07	152.1	363.058	C10H14N5O8P	[M+H]+	C00144	Guanosine 5'-monophosphate	Nucleotides and derivatives	Nucleotides and derivatives	85-32-5	1	19910000
pme3337	Positive	384.12	252	383.108	C14H17N5O8	[M+H]+	-	Succinyladenosine	Nucleotides and derivatives	Nucleotides and derivatives	4542-23-8	1	978080
pmc0281	Positive	400.15	136.11	399.139	C15H21N5O8	[M+H]+	-	Ribosyladenosine	Nucleotides and derivatives	Nucleotides and derivatives	-	3	2923700
pme3007	Negative	402.99	159	404.002	C9H14N2O12P2	[M-H]-	C00015	Uridine 5'-diphosphate	Nucleotides and derivatives	Nucleotides and derivatives	58-98-0	2	22330
pme2117	Negative	426	159	427.029	C10H15N5O10P2	[M-H]-	C00008	Adenosine 5'-diphosphate	Nucleotides and derivatives	Nucleotides and derivatives	58-64-0	3	146840
MWS5083	Negative	455.1	96.97	456.105	C17H21N4O9P	[M-H]-	C00061	Flavin Single Nucleotide(FMN)	Nucleotides and derivatives	Nucleotides and derivatives	6184-17-4	2	570630
MWSmce668	Negative	505.99	158.93	507.18	C10H16N5O13P3	[M-H]-	-	ATP	Nucleotides and derivatives	Nucleotides and derivatives	56-65-5	3	8070.2
pmb2922	Negative	565.05	323.1	566.055	C15H24N2O17P2	[M-H]-	C00029	Uridine 5'-diphospho-D-glucose	Nucleotides and derivatives	Nucleotides and derivatives	133-89-1	3	108920
mws0843	Negative	657.1	328	658.105	C20H24N10O12P2	[M-H]-	C20565	Cyclic di-3',5'-adenylic acid	Nucleotides and derivatives	Nucleotides and derivatives	54447-84-6	2	8203.1
pmb0530	Positive	664.12	136.2	663.109	C21H27N7O14P2	[M+H]+	C00003	Nicotinic acid adenine dinucleotide	Nucleotides and derivatives	Nucleotides and derivatives	53-84-9	2	33316
pme2651	Negative	742.1	620.1	743.075	C21H28N7O17P3	[M-H]-	C00006	NADP (Nicotinamide adenine dinucleotide phosphate)	Nucleotides and derivatives	Nucleotides and derivatives	53-59-8	3	18120
pme2746	Negative	784.15	437	785.157	C27H33N9O15P2	[M-H]-	C00016	Riboflavin 5'-Adenosine Diphosphate	Nucleotides and derivatives	Nucleotides and derivatives	146-14-5	1	6347.6
Lmmp007480	Positive	257.08	137.02	256.074	C15H12O4	[M+H]+	-	2,4,4'-trihydroxychalcone	Flavonoids	Chalcones	-	2	2817700
pme3217	Positive	257.08	137	256.074	C15H12O4	[M+H]+	C08650	Isoliquiritigenin	Flavonoids	Chalcones	961-29-5	1	2842600
Lmmp005125	Positive	271.1	167.03	270.089	C16H14O4	[M+H]+	-	Pinostrobin Chalcone	Flavonoids	Chalcones	18956-15-5	3	26656
Hmlp006030	Positive	271.1	151.04	270.089	C16H14O4	[M+H]+	-	4,4'-dihydroxy-2-methoxychalcone	Flavonoids	Chalcones	-	1	5209200
mws4060	Positive	271.1	121.03	270.089	C16H14O4	[M+H]+	-	Echinatin	Flavonoids	Chalcones	34221-41-5	3	1394400
pme1201	Negative	273.08	167.03	274.084	C15H14O5	[M-H]-	C00774	Phloretin	Flavonoids	Chalcones	60-82-2	2	7877.2
Zmpn002440	Negative	287.06	135.05	288.063	C15H12O6	[M-H]-	C15525	3,4,2',4',6'-Pentahydroxychalcone	Flavonoids	Chalcones	14917-41-0	2	150020
Hmlp006426	Positive	303.12	167.07	302.115	C17H18O5	[M+H]+	-	4,4'-dihydroxy-2,6-dimethoxydihydrochalcone	Flavonoids	Chalcones	151752-08-8	1	756600
pmp000384	Positive	419.13	257.08	418.126	C21H22O9	[M+H]+	C16978	Isoliquiritin	Flavonoids	Chalcones	5041-81-6	3	139810
HJN055	Negative	435.13	273.08	436.136	C21H24O10	[M-H]-	-	Dihydrocharcone-4'-O-glucoside	Flavonoids	Chalcones	-	2	87687
Lmfn004093	Negative	435.13	315.09	436.137	C21H24O10	[M-H]-	-	Phloretin-4'-O-glucoside (Trilobatin)	Flavonoids	Chalcones	4192-90-9	2	100190
pmn001716	Negative	447.09	285.04	448.101	C21H20O11	[M-H]-	C08598	Carthamone	Flavonoids	Chalcones	86579-00-2	2	1368200
Lmsn003297	Negative	449.11	287.06	450.116	C21H22O11	[M-H]-	C16408	3,4,2',4',6'-Pentahydroxychalcone-4'-O-glucoside	Flavonoids	Chalcones	-	2	516270
Hmpn005101	Negative	451.12	289.07	452.131	C21H24O11	[M-H]-	-	Sieboldin	Flavonoids	Chalcones	18777-73-6	2	117850
Cmxn004016	Negative	451.13	289.08	452.132	C21H24O11	[M-H]-	-	Dihydromarein	Flavonoids	Chalcones	-	2	93393
Zmhp002431	Positive	595.17	433.11	594.158	C27H30O15	[M+H]+	-	saffloquinoside A	Flavonoids	Chalcones	-	1	2289000
mws0789	Negative	255.07	151	256.074	C15H12O4	[M-H]-	C09827	Pinocembrin (Dihydrochrysin)	Flavonoids	Flavanones	480-39-7	2	27346
MWSHY0017	Positive	273.08	153.02	272.068	C15H12O5	[M+H]+	-	(±)-Naringenin	Flavonoids	Flavanones	67604-48-2	1	1048600
pme3475	Positive	273.08	153	272.068	C15H12O5	[M+H]+	C09614	Butin	Flavonoids	Flavanones	492-14-8	1	984230
pme0376	Negative	271.06	151	272.068	C15H12O5	[M-H]-	C00509	Naringenin (5,7,4'-Trihydroxyflavanone)	Flavonoids	Flavanones	480-41-1	1	2092900
mws0064	Negative	287.06	135	288.063	C15H12O6	[M-H]-	C05631	Eriodictyol (5,7,3',4'-Tetrahydroxyflavanone)	Flavonoids	Flavanones	552-58-9	1	142990
mws0058	Negative	299.06	284	300.063	C16H12O6	[M-H]-	C10038	Diosmetin (5,7,3'-Trihydroxy-4'-methoxyflavone)	Flavonoids	Flavanones	520-34-3	1	1420800
Lmsp008681	Positive	331.12	197.05	330.11	C18H18O6	[M+H]+	-	5-Hydroxy-7,8,4'-Trimethoxyflavanone	Flavonoids	Flavanones	-	2	1831800
pmp000383	Positive	419.13	257.08	418.126	C21H22O9	[M+H]+	C16989	Liquiritigenin-4'-O-Glucoside (Liquiritin)	Flavonoids	Flavanones	551-15-5	3	84077
HJN090	Negative	433.11	271.06	434.121	C21H22O10	[M-H]-	-	Butin-7-O-glucoside	Flavonoids	Flavanones	-	2	119150
mws1179	Negative	433.11	271	434.121	C21H22O10	[M-H]-	C09099	Naringenin-7-O-glucoside (Prunin)	Flavonoids	Flavanones	529-55-5	1	980520
Lmsp004301	Positive	451.12	289.07	450.116	C21H22O11	[M+H]+	-	3',5,5',7-Tetrahydroxyflavanone-7-O-glucoside	Flavonoids	Flavanones	-	2	6797100
MWS20145	Positive	451.12	289.07	450.116	C21H22O11	[M+H]+	-	eriodictyol 7-O-β-D-glucopyranoside	Flavonoids	Flavanones	-	1	6900700
pmb3023	Negative	449.11	287	450.116	C21H22O11	[M-H]-	-	Eriodictyol-8-C-glucoside	Flavonoids	Flavanones	1023271-51-3	2	847180
HJN086	Negative	449.11	287.06	450.116	C21H22O11	[M-H]-	-	Eriodictyol-3'-O-glucoside	Flavonoids	Flavanones	-	1	5127000
pmp000579	Positive	463.12	301.07	462.116	C22H22O11	[M+H]+	-	Diosmetin-7-O-galactoside*	Flavonoids	Flavanones	-	1	16824000
Hmmp004965	Positive	463.12	301.07	462.116	C22H22O11	[M+H]+	-	Diosmetin-7-O-Beta-D-Glucopyranoside*	Flavonoids	Flavanones	20126-59-4	1	16354000
Lmdp004307	Positive	463.16	301.11	462.152	C23H26O10	[M+H]+	-	Farrerol-7-O-glucoside	Flavonoids	Flavanones	885044-12-2	2	8303300
pmp000588	Positive	549.12	463.12	548.117	C25H24O14	[M+H]+	-	Diosmetin-7-O-(6''-malonyl)glucoside	Flavonoids	Flavanones	-	1	1017000
mws1519	Negative	595.17	287.06	596.174	C27H32O15	[M-H]-	C09732	Eriodictyol-7-O-Rutinoside (Eriocitrin)	Flavonoids	Flavanones	13463-28-0	2	44745
mws0914	Negative	271.06	151	272.068	C15H12O5	[M-H]-	C09826	Pinobanksin	Flavonoids	Flavanonols	548-82-3	1	2176700
mws0044	Negative	303.05	125.02	304.058	C15H12O7	[M-H]-	C01617	Dihydroquercetin(Taxifolin)	Flavonoids	Flavanonols	480-18-2	2	55415
pmp000380	Positive	409.2	363.2	408.194	C25H28O5	[M+H]+	-	3-Hydroxyglabrol	Flavonoids	Flavanonols	74148-41-7	3	16695
mws1360	Negative	433.11	269.1	434.121	C21H22O10	[M-H]-	-	Engeletin	Flavonoids	Flavanonols	572-31-6	2	16450
Lmtn002796	Negative	449.1	287.05	450.116	C21H22O11	[M-H]-	-	Aromadendrin-7-O-glucoside	Flavonoids	Flavanonols	28189-90-4	1	2230800
mws1361	Negative	449.11	151	450.116	C21H22O11	[M-H]-	C17449	Taxifolin-3-O-rhamnoside (Astilbin)	Flavonoids	Flavanonols	29838-67-3	2	81153
Lmmn004625	Negative	449.11	287.06	450.116	C21H22O11	[M-H]-	-	Dihydrokaempferol-7-O-glucoside	Flavonoids	Flavanonols	-	1	6075700
Lmdp003110	Positive	289.07	243.07	288.063	C15H12O6	[M+H]+	C16233	2,6,7,4'-Tetrahydroxyisoflavanone	Flavonoids	Dihydroisoflavones	-	1	258690
Lmgn002933	Negative	345.1	315.05	346.106	C18H18O7	[M-H]-	-	5,7-Dihydroxy-2',3',4'-trimethoxydihydroisoflavone	Flavonoids	Dihydroisoflavones	-	3	12417
pmb0563	Positive	301.07	286	301.071	C16H13O6+	[M]+	C08726	Peonidin	Flavonoids	Anthocyanidins	134-01-0	2	12937
Cmsp002257	Positive	595.16	301.07	595.166	C27H31O15+	[M]+	-	Peonidin-3-O-sambubioside	Flavonoids	Anthocyanidins	-	2	370980
Lmtp003079	Positive	609.18	301.07	609.181	C28H33O15+	[M]+	-	Peonidin-3-O-rutinoside	Flavonoids	Anthocyanidins	-	2	12144
Zmmp002642	Positive	625.16	287.06	625.155	C31H29O14+	[M]+	-	Cyanidin-3-O-(6''-O-feruloyl)glucoside	Flavonoids	Anthocyanidins	-	2	851860
Lmpp003228	Positive	641.15	317.07	641.15	C31H29O15+	[M]+	-	Petunidin-3-O-(6''-O-caffeoyl)glucoside	Flavonoids	Anthocyanidins	-	2	63071
Zmqp002952	Positive	773.21	465.1	773.213	C33H41O21+	[M]+	-	Delphinidin-3-O-rutinoside-7-O-glucoside	Flavonoids	Anthocyanidins	-	3	9321700
Zmcp002839	Positive	789.21	303.05	789.208	C33H41O22+	[M]+	C16314	Delphinidin-3,5,3'-Tri-O-glucoside	Flavonoids	Anthocyanidins	-	1	6044000
Lmqp001553	Positive	789.21	465.1	789.209	C33H41O22+	[M]+	-	Delphinidin-3-O-sophoroside-5-O-glucoside	Flavonoids	Anthocyanidins	-	2	93215
Zmyn003693	Negative	267.07	252.04	268.074	C16H12O4	[M-H]-	C15203	6-Hydroxy-2'-methoxyflavone	Flavonoids	Flavones	61546-59-6	2	7453200
mws0041	Positive	271.06	123.01	270.053	C15H10O5	[M+H]+	C10023	Baicalein	Flavonoids	Flavones	491-67-8	1	61444
pmp000344	Positive	271.06	243.06	270.053	C15H10O5	[M+H]+	-	3',4',7-Trihydroxyflavone	Flavonoids	Flavones	2150-11-0	1	107350
MWSHY0053	Positive	271.06	137.02	270.053	C15H10O5	[M+H]+	-	3,7,4'-Trihydroxyflavone	Flavonoids	Flavones	2034-65-3	2	309260
Hmlp005105	Positive	285.08	270.05	284.068	C16H12O5	[M+H]+	-	3,7-dihydroxy-4'-methoxyflavone	Flavonoids	Flavones	-	2	175670
mws0129	Positive	285.08	270	284.068	C16H12O5	[M+H]+	C10046	Genkwanin (Apigenin 7-methyl ether)	Flavonoids	Flavones	437-64-9	1	170050
pme0088	Negative	285.04	151	286.048	C15H10O6	[M-H]-	C01514	Luteolin (5,7,3',4'-Tetrahydroxyflavone)	Flavonoids	Flavones	491-70-3	2	49788
pmp000001	Positive	301.07	286.05	300.063	C16H12O6	[M+H]+	C10058	Hispidulin (5,7,4'-Trihydroxy-6-methoxyflavone)	Flavonoids	Flavones	1447-88-7	2	1316000
Zmhn003257	Negative	299.06	284.04	300.063	C16H12O6	[M-H]-	-	5,7,2'-Trhiyroxy-8-methoxyflavone	Flavonoids	Flavones	-	1	4821000
MWSHY0095	Positive	331.08	271.06	330.074	C17H14O7	[M+H]+	-	Tricin	Flavonoids	Flavones	520-32-1	2	32707
mws1474	Positive	345.1	284	344.09	C18H16O7	[M+H]+	C19807	5,7-Dihydroxy-3',4',5'-trimethoxyflavone	Flavonoids	Flavones	18103-42-9	2	3985.8
pmp000008	Positive	359.11	344.08	358.105	C19H18O7	[M+H]+	-	5-Hydroxy-6,7,3',4'-tetramethoxyflavone	Flavonoids	Flavones	21763-80-4	2	4870
mws0055	Positive	373.13	343.09	372.121	C20H20O7	[M+H]+	C10190	Tangeretin (4',5,6,7,8-Pentamethoxyflavone)	Flavonoids	Flavones	481-53-8	2	587490
mws0043	Positive	403.14	373.1	402.131	C21H22O8	[M+H]+	C10112	Nobiletin (5,6,7,8,3',4'-Hexamethoxyflavone)	Flavonoids	Flavones	478-01-3	2	437910
pmp000378	Positive	407.19	351.12	406.178	C25H26O5	[M+H]+	-	Gancaonin Q	Flavonoids	Flavones	134958-52-4	3	3650.6
mws0072	Positive	433.11	271.01	432.106	C21H20O10	[M+H]+	-	Apigenin-5-O-glucoside*	Flavonoids	Flavones	28757-27-9	2	2228400
pmb3006	Negative	431.1	269.1	432.106	C21H20O10	[M-H]-	C04608	Apigenin-7-O-glucoside(Cosmosiin)*	Flavonoids	Flavones	578-74-5	1	51926
mws0052	Positive	447.09	271.07	446.085	C21H18O11	[M+H]+	C10025	Baicalin	Flavonoids	Flavones	21967-41-9	2	2659800
pmn001697	Negative	445.08	269.05	446.085	C21H18O11	[M-H]-	-	Apigenin-7-O-glucuronide	Flavonoids	Flavones	29741-09-1	1	1885300
pmp000573	Positive	447.13	285.08	446.121	C22H22O10	[M+H]+	-	Acacetin-7-O-galactoside	Flavonoids	Flavones	-	1	5837700
pme2459	Positive	449.11	287.2	448.101	C21H20O11	[M+H]+	C03951	Luteolin-7-O-glucoside (Cynaroside)*	Flavonoids	Flavones	5373-11-5	2	12750000
MWS20147	Positive	449.11	287.06	448.101	C21H20O11	[M+H]+	-	luteolin-3'-O-β-D-glucopyranoside*	Flavonoids	Flavones	5154-41-6	2	876060
pmn001702	Negative	461.07	285.05	462.08	C21H18O12	[M-H]-	-	Tetahydroxyflavone-7-O-glucuronide	Flavonoids	Flavones	-	1	1916300
mws4167	Positive	463.09	287.06	462.08	C21H18O12	[M+H]+	C03515	Luteolin-7-O-glucuronide	Flavonoids	Flavones	29741-10-4	2	3882400
MWSHY0035	Positive	463.09	287.06	462.08	C21H18O12	[M+H]+	-	Scutellarin	Flavonoids	Flavones	27740-01-8	1	4072100
pmb2999	Negative	461.11	299.1	462.116	C22H22O11	[M-H]-	-	Chrysoeriol-5-O-glucoside	Flavonoids	Flavones	-	1	202930
Hmcn001884	Negative	463.09	301.03	464.095	C21H20O12	[M-H]-	-	6-Hydroxyluteolin 5-glucoside	Flavonoids	Flavones	-	2	149380
pmp000581	Positive	475.12	271.06	474.116	C23H22O11	[M+H]+	-	Apigenin-7-O-(6''-acetyl)glucoside	Flavonoids	Flavones	72741-92-5	2	426410
HJAP056	Positive	477.14	315.1	476.131	C23H24O11	[M+H]+	-	Dihydroxy-dimethoxyflavone-7-O-glucoside	Flavonoids	Flavones	-	2	344780
pmp000172	Positive	477.14	315.08	476.132	C23H24O11	[M+H]+	-	5,2'-Dihydroxy-7,8-dimethoxyflavone glycosides	Flavonoids	Flavones	-	2	307720
pmp000585	Positive	519.11	433.11	518.106	C24H22O13	[M+H]+	C10020	Apigenin-7-O-(6''-malonyl)glucoside	Flavonoids	Flavones	86546-87-4	1	273350
pmp000587	Positive	535.11	449.1	534.101	C24H22O14	[M+H]+	C10103	Luteolin-7-O-(6''-malonyl)glucoside	Flavonoids	Flavones	-	2	23187
pmb0608	Positive	549.12	301.4	548.117	C25H24O14	[M+H]+	-	Chrysoeriol-7-O-(6''-malonyl)glucoside	Flavonoids	Flavones	-	1	2469300
Lmhp003658	Positive	577.15	329.1	576.148	C27H28O14	[M+H]+	-	Monohydroxy-trimethoxyflavone-O-(6''-malonyl)glucoside	Flavonoids	Flavones	-	3	74135
Wmkp002590	Positive	595.19	127.04	594.158	C27H30O15	[M+H]+	-	5,7-Dihydroxy-4-methoxyflavone-3-O-xylose-(1-6)-glucose	Flavonoids	Flavones	-	3	47638
pmp001079	Positive	595.17	449.1	594.158	C27H30O15	[M+H]+	C12630	Luteolin-7-O-neohesperidoside (Lonicerin)	Flavonoids	Flavones	25694-72-8	1	733120
pmp000593	Positive	595.17	449.1	594.158	C27H30O15	[M+H]+	-	Luteolin-7-O-rutinoside	Flavonoids	Flavones	3563-98-2	1	9495500
pmb3002	Negative	607.17	299	608.174	C28H32O15	[M-H]-	-	Chrysoeriol-7-O-rutinoside	Flavonoids	Flavones	-	2	51278
pmb0603	Positive	625.18	301.6	624.169	C28H32O16	[M+H]+	-	Chrysoeriol-7,4'-di-O-glucoside	Flavonoids	Flavones	-	2	99901
pmb0587	Positive	639.16	477	638.148	C28H30O17	[M+H]+	-	Chrysoeriol-7-O-(2''-O-glucuronyl)glucoside	Flavonoids	Flavones	-	2	83902
mws1173	Negative	271.06	242.7	272.068	C15H12O5	[M-H]-	C09751	Garbanzol	Flavonoids	Flavonols	1226-22-8	2	109380
mws1068	Negative	285.04	151	286.048	C15H10O6	[M-H]-	C05903	Kaempferol (3,5,7,4'-Tetrahydroxyflavone)	Flavonoids	Flavonols	520-18-3	3	14942
Lmjp004941	Positive	301.07	286.05	300.063	C16H12O6	[M+H]+	C17059	Rhamnocitrin (7-Methylkaempferol)	Flavonoids	Flavonols	569-92-6	2	2430600
Lmcp004693	Positive	301.07	258.05	300.063	C16H12O6	[M+H]+	C10098	Kaempferide (3,5,7-Trihydroxy-4'-methoxyflavone)	Flavonoids	Flavonols	491-54-3	1	9269.9
Zmpp002571	Positive	303.05	257.05	302.043	C15H10O7	[M+H]+	C10177	Robinetin	Flavonoids	Flavonols	490-31-3	2	68620
pme2954	Positive	303.05	137.02	302.043	C15H10O7	[M+H]+	C00389	Quercetin	Flavonoids	Flavonols	117-39-5	2	129730
mws2627	Positive	317.07	285.04	316.058	C16H12O7	[M+H]+	C10188	Tamarixetin (3,3',5,7-Tetrahydroxy-4'-Methoxyflavone)	Flavonoids	Flavonols	603-61-2	2	24976
mws0066	Negative	315.05	151	316.058	C16H12O7	[M-H]-	C10084	Isorhamnetin	Flavonoids	Flavonols	480-19-3	2	26041
pmn001581	Negative	315.05	241	316.058	C16H12O7	[M-H]-	C10185	Sexangularetin	Flavonoids	Flavonols	571-74-4	2	3259.2
mws1003	Negative	331.05	151	332.053	C16H12O8	[M-H]-	C12633	Laricitrin	Flavonoids	Flavonols	53472-37-0	2	8431.5
mws1002	Negative	345.06	330	346.069	C17H14O8	[M-H]-	C11620	Syringetin	Flavonoids	Flavonols	4423-37-4	2	11150
pme0321	Negative	431.1	285	432.106	C21H20O10	[M-H]-	-	Kaempferol-7-O-rhamnoside	Flavonoids	Flavonols	20196-89-8	1	89515
mws2186	Positive	435.09	303	434.085	C20H18O11	[M+H]+	-	Avicularin(Quercetin-3-O-α-L-arabinofuranoside)	Flavonoids	Flavonols	572-30-5	2	58401
Xmyp005654	Positive	449.11	287.06	448.101	C21H20O11	[M+H]+	-	Kaempferol-4'-O-glucoside*	Flavonoids	Flavonols	-	1	5873200
mws0089	Negative	447.09	285.04	448.101	C21H20O11	[M-H]-	-	Kaempferol-7-O-glucoside*	Flavonoids	Flavonols	16290-07-6	2	1744600
mws0913	Negative	447.09	285	448.101	C21H20O11	[M-H]-	C12626	Kaempferol-3-O-galactoside (Trifolin)*	Flavonoids	Flavonols	23627-87-4	2	1600100
mws2209	Positive	449.11	287.06	448.101	C21H20O11	[M+H]+	C12249	Kaempferol-3-O-glucoside (Astragalin)*	Flavonoids	Flavonols	480-10-4	1	6935200
mws1329	Negative	463.09	300.7	464.095	C21H20O12	[M-H]-	C12639	Quercetin-7-O-glucoside*	Flavonoids	Flavonols	491-50-9	1	124540
mws0856	Negative	463.09	301	464.095	C21H20O12	[M-H]-	-	Quercetin-4'-O-glucoside (Spiraeoside)*	Flavonoids	Flavonols	20229-56-5	1	1023600
Smgp004575	Positive	465.1	303.05	464.095	C21H20O12	[M+H]+	-	Quercetin-5-O-β-D-glucoside*	Flavonoids	Flavonols	-	1	1971900
pmp001309	Positive	465.1	303.1	464.095	C21H20O12	[M+H]+	-	6-Hydroxykaempferol-7-O-glucoside	Flavonoids	Flavonols	-	1	504680
mws0091	Negative	463.09	300.03	464.095	C21H20O12	[M-H]-	C05623	Quercetin-3-O-glucoside (Isoquercitrin)*	Flavonoids	Flavonols	482-35-9	1	913200
mws0061	Negative	463.09	300	464.095	C21H20O12	[M-H]-	C10073	Quercetin-3-O-galactoside (Hyperin)*	Flavonoids	Flavonols	482-36-0	1	112360
Lmfn003760	Negative	477.07	301.04	478.075	C21H18O13	[M-H]-	-	Quercetin-4′-O-glucuronide	Flavonoids	Flavonols	201463-36-7	1	114190
Lmmn003398	Negative	489.11	285.04	490.111	C23H22O12	[M-H]-	-	Kaempferol-3-O-(6''-acetyl)glucoside	Flavonoids	Flavonols	-	2	1491200
pmn001644	Negative	519.08	300	520.085	C23H20O14	[M-H]-	-	Quercetin-3-O-(2''-acetyl)glucuronide	Flavonoids	Flavonols	-	2	203990
Li512111	Negative	519.11	315.05	520.122	C24H24O13	[M-H]-	-	Isorhamnetin-3-O-(6''-acetylglucoside)	Flavonoids	Flavonols	-	2	420130
Lmdp004892	Positive	535.11	287.05	534.101	C24H22O14	[M+H]+	-	Kaempferol-3-O-(6''-malonyl)galactoside	Flavonoids	Flavonols	-	2	23024000
Zmhp006502	Positive	549.12	301.07	548.117	C25H24O14	[M+H]+	-	Kaempferide-3-O-(6''-malonyl)glucoside	Flavonoids	Flavonols	-	2	847320
Hmln002189	Negative	549.09	505.11	550.096	C24H22O15	[M-H]-	-	Quercetin-3-O-(6''-malonyl)galactoside*	Flavonoids	Flavonols	-	2	136770
pmp000589	Positive	551.1	303.05	550.096	C24H22O15	[M+H]+	-	Quercetin-7-O-(6''-malonyl)glucoside*	Flavonoids	Flavonols	-	2	155510
HJAP064	Positive	565.12	317.08	564.088	C25H24O15	[M+H]+	-	Isorhamnetin-3-O-(6''-malonylglucoside)	Flavonoids	Flavonols	-	2	750390
Zmhp005139	Positive	565.12	317.07	564.112	C25H24O15	[M+H]+	-	Tamarixetin-3-O-(6''-malonyl)glucoside	Flavonoids	Flavonols	-	2	774940
Lmsp004670	Positive	595.17	287.06	594.158	C27H30O15	[M+H]+	-	Kaempferol-3-O-glucoside-7-O-rhamnoside*	Flavonoids	Flavonols	-	1	24867000
Lmsn002815	Negative	593.15	285.04	594.158	C27H30O15	[M-H]-	C21833	Kaempferol-3-O-rutinoside(Nicotiflorin)*	Flavonoids	Flavonols	17650-84-9	1	5217500
pme1605	Negative	593.15	285	594.158	C27H30O15	[M-H]-	-	Kaempferol-3-O-robinobioside(Biorobin)	Flavonoids	Flavonols	17297-56-2	1	17094000
Lmjp002867	Positive	595.17	287.05	594.158	C27H30O15	[M+H]+	-	Kaempferol-3-O-neohesperidoside*	Flavonoids	Flavonols	32602-81-6	1	26457000
pmn001583	Negative	609.15	300	610.153	C27H30O16	[M-H]-	-	Quercetin-3-O-robinobioside*	Flavonoids	Flavonols	52525-35-6	1	2194400
mws0059	Negative	609.15	301	610.153	C27H30O16	[M-H]-	C05625	Quercetin-3-O-rutinoside (Rutin)*	Flavonoids	Flavonols	153-18-4	1	2001000
Lmzn001664	Negative	623.13	447.1	624.133	C27H28O17	[M-H]-	-	Kaempferol-3-O-glucuronide-7-O-glucoside	Flavonoids	Flavonols	-	2	12087000
MWSHY0064	Positive	625.17	317.07	624.169	C28H32O16	[M+H]+	-	Isorhamnetin-3-O-neohespeidoside	Flavonoids	Flavonols	55033-90-4	1	18472000
Lmsp004721	Positive	625.18	317.07	624.169	C28H32O16	[M+H]+	-	Tamarixetin-3-O-glucoside-7-O-rhamnoside	Flavonoids	Flavonols	-	1	18665000
Zmhp102730	Positive	627.16	303.05	626.148	C27H30O17	[M+H]+	-	6-Hydroxykaempferol 3,6-Diglucoside	Flavonoids	Flavonols	-	1	21096000
pmp001310	Positive	627.16	303.1	626.148	C27H30O17	[M+H]+	-	6-Hydroxykaempferol-3,6-O-Diglucoside	Flavonoids	Flavonols	-	1	22899000
Zmcp002666	Positive	627.14	303.05	626.148	C27H30O17	[M+H]+	-	Quercetin3,7-diglucoside	Flavonoids	Flavonols	-	1	929320
pmb0709	Positive	713.16	465.2	712.149	C30H32O20	[M+H]+	-	Quercetin-7-O-(6''-malonyl)glucosyl-5-O-glucoside	Flavonoids	Flavonols	-	2	298440
Zmgp002582	Positive	757.22	433.11	756.211	C33H40O20	[M+H]+	-	kaempferol 3-O-β-glucopyranosyl (1 → 2)-β-galactopyranoside 7-O-α-rhamnopyranoside	Flavonoids	Flavonols	-	3	88910
Zmgp002857	Positive	757.22	303.05	756.211	C33H40O20	[M+H]+	-	quercetin 3-O-α-rhamnopyranosyl (1→2)-[α-rhamnopyranosyl (1→6)]-β-glucopyranoside	Flavonoids	Flavonols	-	3	16341
Lmjp003206	Positive	759.2	303.05	758.191	C32H38O21	[M+H]+	-	Quercetin-3-O-Sambubioside-5-O-Glucoside	Flavonoids	Flavonols	-	3	22000
Zmhp002640	Positive	773.21	303.05	772.206	C33H40O21	[M+H]+	-	6-Hydroxykaempferol 3-Rutinoside-6-glucoside	Flavonoids	Flavonols	-	1	5794900
Lmmp002334	Positive	773.21	303.05	772.206	C33H40O21	[M+H]+	-	Quercetin-3-O-rutinoside-7-O-glucoside	Flavonoids	Flavonols	-	1	5285000
pmp001314	Positive	773.21	627.2	772.206	C33H40O21	[M+H]+	-	6-Hydroxykaempferol-3-O-rutin-6-O-glucoside	Flavonoids	Flavonols	-	1	5261900
Zmhp001956	Positive	789.2	303.05	788.201	C33H40O22	[M+H]+	-	6-Hydroxykaempferol 3,6,7-triglucoside	Flavonoids	Flavonols	-	1	7030800
pmp001312	Positive	789.21	303.1	788.201	C33H40O22	[M+H]+	-	6-Hydroxykaempferol-3,7,6-O-triglycoside	Flavonoids	Flavonols	-	1	15591000
Zmhp001820	Positive	803.18	303.05	802.18	C33H38O23	[M+H]+	-	6-Hydroxykaempferol 3,6-Diglucoside 7-Glucuronide	Flavonoids	Flavonols	-	1	18368
pmp001313	Positive	803.19	303.1	802.18	C33H38O23	[M+H]+	-	6-Hydroxykaempferol-3,6-O-Diglucoside-7-O-Glucuronic Acid	Flavonoids	Flavonols	-	1	13209000
Lmwp004293	Positive	935.25	303.05	934.238	C42H46O24	[M+H]+	-	Quercetin-3-O-(2'''-p-coumaroyl)sophoroside-7-O-glucoside	Flavonoids	Flavonols	-	3	14606
Hmgp003664	Positive	417.12	381.1	416.111	C21H20O9	[M+H]+	-	Apigenin-6-C-rhamnoside	Flavonoids	Flavonoid carbonoside	-	2	9865.8
pme1611	Negative	433.11	313	434.121	C21H22O10	[M-H]-	-	Isohemiphloin	Flavonoids	Flavonoid carbonoside	3682-02-8	2	94499
pmp000237	Positive	579.13	283.06	578.127	C26H26O15	[M+H]+	-	Apigenin-6-C-(2''-glucuronyl)xyloside	Flavonoids	Flavonoid carbonoside	-	2	16267
Lmnp002741	Positive	579.17	447.13	578.164	C27H30O14	[M+H]+	-	Genkwanin-6-C-(2''-O-apiosyl)glucoside	Flavonoids	Flavonoid carbonoside	-	2	1469400
Zmjp003291	Positive	595.17	433.12	594.158	C27H30O15	[M+H]+	-	"Vitexin-2""-O-galactoside*"	Flavonoids	Flavonoid carbonoside	-	2	24356000
Lmlp002990	Positive	595.17	313.07	594.158	C27H30O15	[M+H]+	-	Isosaponarin(Isovitexin-4'-O-glucoside)	Flavonoids	Flavonoid carbonoside	19416-87-6	2	1053700
MWSslk146	Positive	595.17	433.12	594.518	C27H30O15	[M+H]+	-	4'-O-Glucosylvitexin*	Flavonoids	Flavonoid carbonoside	38950-94-6	2	1428100
mws0054	Negative	289.07	245	290.079	C15H14O6	[M-H]-	C06562	Catechin	Flavonoids	Flavanols	154-23-4	1	193640
mws0355	Negative	441.08	169.02	442.09	C22H18O10	[M-H]-	-	Catechin gallate*	Flavonoids	Flavanols	130405-40-2	2	38866
mws1397	Negative	441.08	169	442.09	C22H18O10	[M-H]-	-	Epicatechin gallate*	Flavonoids	Flavanols	1257-08-5	2	22809
pmn001386	Negative	271.1	147.02	272.105	C16H16O4	[M-H]-	C00786	(-)-Vestitone	Flavonoids	Other Flavonoids	158112-50-6	2	20545
pmp000566	Positive	287.09	163	286.084	C16H14O5	[M+H]+	-	Claussequinone	Flavonoids	Other Flavonoids	35878-39-8	2	95929
MWSmce566	Positive	301.11	167.08	300.31	C17H16O5	[M+H]+	-	Methylnissolin	Flavonoids	Other Flavonoids	73340-41-7	1	2642900
MWSHY0099	Positive	463.16	167.07	462.153	C23H26O10	[M+H]+	-	Methylnissolin-3-O-glucoside	Flavonoids	Other Flavonoids	94367-42-7	2	233200
pme0355	Positive	255.07	137	254.058	C15H10O4	[M+H]+	C10208	Daidzein	Flavonoids	Isoflavones	486-66-8	3	362850
Lmdn007639	Negative	255.07	119.05	256.074	C15H12O4	[M-H]-	C04271	3,9-Dihydroxypterocarpan	Flavonoids	Isoflavones	61135-91-9	1	5327100
mws0037	Negative	267.07	252	268.074	C16H12O4	[M-H]-	C00858	Formononetin (7-Hydroxy-4'-methoxyisoflavone)	Flavonoids	Isoflavones	485-72-3	1	1264200
pme3261	Positive	271.06	215	270.053	C15H10O5	[M+H]+	C14314	6-Hydroxydaidzein*	Flavonoids	Isoflavones	17817-31-1	2	25466
mws0063	Positive	271.06	153.02	270.053	C15H10O5	[M+H]+	C06563	Genistein	Flavonoids	Isoflavones	446-72-0	1	559720
mws0912	Positive	271.06	201	270.053	C15H10O5	[M+H]+	C02495	2'-Hydroxydaidzein*	Flavonoids	Isoflavones	7678-85-5	2	7039
Zmgp006231	Positive	283.06	225.05	282.053	C16H10O5	[M+H]+	C10522	pseudobaptigenin	Flavonoids	Isoflavones	90-29-9	3	4053.1
Zmgp007333	Positive	283.1	268.07	282.089	C17H14O4	[M+H]+	-	7,4'-Di-O-methyldaidzein	Flavonoids	Isoflavones	1157-39-7	3	9230.2
pme3250	Positive	285.08	270	284.068	C16H12O5	[M+H]+	C00814	Biochanin A	Flavonoids	Isoflavones	491-80-5	1	187280
pmp000416	Positive	285.08	229.08	284.068	C16H12O5	[M+H]+	-	3'-Methoxydaidzein	Flavonoids	Isoflavones	21913-98-4	1	169160
pme3233	Positive	285.08	270	284.068	C16H12O5	[M+H]+	C01562	Calycosin	Flavonoids	Isoflavones	20575-57-9	1	7752000
mws0908	Negative	283.06	268	284.068	C16H12O5	[M-H]-	C14536	Glycitein	Flavonoids	Isoflavones	40957-83-3	1	1659600
mws1177	Negative	283.06	253.8	284.068	C16H12O5	[M-H]-	C10502	(-)-Maackiain	Flavonoids	Isoflavones	2035-15-6	3	1527.9
mws0918	Negative	283.06	268	284.068	C16H12O5	[M-H]-	C10521	Prunetin (5,4'-Dihydroxy-7-methoxyisoflavone)	Flavonoids	Isoflavones	552-59-0	1	2081300
Lmmp004504	Positive	287.06	153.02	286.047	C15H10O6	[M+H]+	C12134	2'-Hydroxygenistein	Flavonoids	Isoflavones	1156-78-1	3	358080
Lmdn006025	Negative	287.06	125.02	288.063	C15H12O6	[M-H]-	C12631	2-Hydroxy-2,3-dihydrogenistein	Flavonoids	Isoflavones	-	3	48658
Lmsn003588	Negative	297.08	282.05	298.084	C17H14O5	[M-H]-	-	Pterocarpine	Flavonoids	Isoflavones	524-97-0	1	2054600
Lmdp005525	Positive	299.09	284.07	298.084	C17H14O5	[M+H]+	C10199	Afrormosin (6,4'-Dimethoxy-7-Hydroxyisoflavone)	Flavonoids	Isoflavones	550-79-8	1	2925600
Lmmp005689	Positive	301.07	258.05	300.063	C16H12O6	[M+H]+	C10203	Cajanin	Flavonoids	Isoflavones	32884-36-9	3	25132
pmp000548	Positive	301.07	286.04	300.063	C16H12O6	[M+H]+	C10520	Pratensein	Flavonoids	Isoflavones	2284-31-3	1	2429800
MWS20189	Positive	301.07	286.05	300.063	C16H12O6	[M+H]+	C10534	Tectorigenin	Flavonoids	Isoflavones	548-77-6	2	2455500
P6625	Positive	303.12	123.04	302.115	C17H18O5	[M+H]+	-	isomucronulatol	Flavonoids	Isoflavones	64474-51-7	3	2381200
Zmgp006938	Positive	315.09	283.06	314.079	C17H14O6	[M+H]+	C10471	irisolidone	Flavonoids	Isoflavones	2345-17-7	2	97304
pmp000362	Positive	369.13	313.07	368.126	C21H20O6	[M+H]+	-	Glisoflavone	Flavonoids	Isoflavones	125709-32-2	3	8991.5
mws4116	Negative	391.19	203.3	392.199	C25H28O4	[M-H]-	C10425	Hispaglabridin A	Flavonoids	Isoflavones	68978-03-0	3	5674.4
mws1597	Positive	417.12	297.1	416.111	C21H20O9	[M+H]+	C10524	Puerarin	Flavonoids	Isoflavones	3681-99-0	3	6443.6
pme1587	Positive	417.12	255	416.111	C21H20O9	[M+H]+	C10216	Daidzein-7-O-glucoside(Daidzin)*	Flavonoids	Isoflavones	552-66-9	2	993260
pmp000417	Positive	417.12	255.06	416.111	C21H20O9	[M+H]+	-	Daidzein-4'-O-glucoside*	Flavonoids	Isoflavones	-	2	116690
pme3504	Positive	431.13	269.08	430.126	C22H22O9	[M+H]+	C10509	Formononetin-7-O-glycoside (Ononin)	Flavonoids	Isoflavones	486-62-4	1	7758200
Lmgp004731	Positive	433.11	271.06	432.106	C21H20O10	[M+H]+	-	Genistein-7-O-galactoside	Flavonoids	Isoflavones	-	2	9760500
pmp000413	Positive	433.11	283.06	432.106	C21H20O10	[M+H]+	C10420	Genistein-8-C-glucoside	Flavonoids	Isoflavones	66026-80-0	2	17102
Lmgp003335	Positive	433.11	271.06	432.106	C21H20O10	[M+H]+	-	4',5-Dihydroxyisoflavone-7-O-galactoside	Flavonoids	Isoflavones	-	2	2603600
mws0895	Negative	431.1	269	432.106	C21H20O10	[M-H]-	C09126	Genistein-7-O-Glucoside (Genistin)	Flavonoids	Isoflavones	529-59-9	1	347090
pmp000415	Positive	447.13	285.07	446.121	C22H22O10	[M+H]+	-	3'-Methoxydaidzin	Flavonoids	Isoflavones	200127-80-6	1	5278600
pmp000550	Positive	447.13	285.07	446.121	C22H22O10	[M+H]+	-	Calycosin-7-O-glucoside	Flavonoids	Isoflavones	20633-67-4	1	8431800
MWSHY0180	Positive	447.13	285.08	446.121	C22H22O10	[M+H]+	-	Glycitin	Flavonoids	Isoflavones	40246-10-4	1	8154400
pme3400	Positive	447.13	285	446.121	C22H22O10	[M+H]+	C05376	Biochanin A-7-O-glucoside (Sissotrin)	Flavonoids	Isoflavones	5928-26-7	1	4414000
HJN091	Negative	445.11	283.06	446.121	C22H22O10	[M-H]-	-	Prunetin-4'-O-glucoside	Flavonoids	Isoflavones	154-36-9	3	17647
Lmyp006086	Positive	447.13	285.07	446.121	C22H22O10	[M+H]+	-	Prunetin-5-O-glucoside	Flavonoids	Isoflavones	-	1	5387800
Zmdp004370	Positive	459.13	255.07	458.121	C23H22O10	[M+H]+	-	6''-O-Acetyldaidzin	Flavonoids	Isoflavones	71385-83-6	3	163010
Lmdp003994	Positive	461.14	299.09	460.137	C23H24O10	[M+H]+	-	6,4'-Dimethoxyisoflavone-7-O-glucoside (Wistin)	Flavonoids	Isoflavones	19046-26-5	2	7696600
Lmmp002795	Positive	463.12	301.07	462.115	C22H22O11	[M+H]+	-	Pratensein-7-O-glucoside	Flavonoids	Isoflavones	36191-03-4	1	1049000
N6356	Negative	463.16	121.03	464.168	C23H28O10	[M-H]-	-	Isomucronulatol 7-O-glucoside	Flavonoids	Isoflavones	94367-43-8	3	942730
pmp000191	Positive	475.12	271.06	474.116	C23H22O11	[M+H]+	-	6''-O-Acetylgenistin	Flavonoids	Isoflavones	73566-30-0	3	474530
pmp000192	Positive	489.14	285.07	488.132	C24H24O11	[M+H]+	-	Acetylglycitin	Flavonoids	Isoflavones	134859-96-4	1	192180
pmp000193	Positive	503.12	255.06	502.111	C24H22O12	[M+H]+	C16191	6''-O-Malonyldaidzin	Flavonoids	Isoflavones	124590-31-4	1	2913600
Zmdp004305	Positive	505.16	255.07	504.142	C28H24O9	[M+H]+	-	Daidzein-7-O-(2''-benzoyl)rhamnoside	Flavonoids	Isoflavones	-	2	57745
Zmdp005767	Positive	517.13	269.09	516.127	C25H24O12	[M+H]+	C16222	Formononetin-7-O-(6''-Malonyl)glucoside	Flavonoids	Isoflavones	-	1	5371100
Zmdp004112	Positive	519.11	271.06	518.106	C24H22O13	[M+H]+	-	Genistein-7-O-(6''-malonyl)glucoside	Flavonoids	Isoflavones	-	3	422540
pmp000194	Positive	519.11	271.05	518.106	C24H22O13	[M+H]+	C16192	6''-O-Malonylgenistin	Flavonoids	Isoflavones	51011-05-3	1	9596900
pmp000195	Positive	533.13	285.07	532.122	C25H24O13	[M+H]+	C16197	6''-O-Malonylglycitin	Flavonoids	Isoflavones	137705-39-6	1	4921200
Wmkn002777	Negative	561.16	267.07	562.169	C27H30O13	[M-H]-	-	7-Hydroxy-3''-methoxy-isoflavone-7-primeveroside	Flavonoids	Isoflavones	-	2	276810
pmp000395	Positive	563.18	269.08	562.169	C27H30O13	[M+H]+	-	Glycyroside	Flavonoids	Isoflavones	125310-04-5	1	1959000
Lmhp003217	Positive	625.17	317.06	624.169	C28H32O16	[M+H]+	-	2'-Hydoxy,5-methoxyGenistein-O-rhamnosyl-glucoside	Flavonoids	Isoflavones	-	1	16861000
Lmhp002800	Positive	641.16	317.06	640.164	C28H32O17	[M+H]+	-	2'-Hydoxy,5-methoxyGenistein-4',7-O-diglucoside	Flavonoids	Isoflavones	-	2	50256
MWS20177	Negative	267.03	223.04	268.037	C15H8O5	[M-H]-	-	5-hydroxy-anthraquinone-2-carboxylic acid	Quinones	Anthraquinone	-	2	26489
MWS20167	Negative	267.07	252.04	268.074	C16H12O4	[M-H]-	-	Rubiadin-1-methyl ether	Quinones	Anthraquinone	7460-43-7	2	68955
Zmhn003059	Negative	283.06	240.04	284.069	C16H12O5	[M-H]-	-	Emodin-1-methyl ether	Quinones	Anthraquinone	-	2	168100
Zmhn001905	Negative	447.09	285.04	448.101	C21H20O11	[M-H]-	-	HydroxyAloe-emodin-8-O-glucoside	Quinones	Anthraquinone	-	2	922010
Zmdn005575	Negative	473.11	269.05	474.116	C23H22O11	[M-H]-	-	Aloe emodin-8-0-(6-acetyl)-glucoside	Quinones	Anthraquinone	-	2	544670
pmn001342	Negative	487.09	283	488.095	C23H20O12	[M-H]-	-	Rhein-8-O-(6'-O-acetyl)glucoside	Quinones	Anthraquinone	-	2	24405000
Zmdn004335	Negative	487.09	283.06	488.095	C23H20O12	[M-H]-	-	Rhein 1-O-(O-acetyl)-glucoside	Quinones	Anthraquinone	-	2	21631000
Zmdn006214	Negative	487.12	283.06	488.132	C24H24O11	[M-H]-	-	Physcion-8-0-(6-acetyl)-glucoside	Quinones	Anthraquinone	-	2	418520
Zmdn005578	Negative	517.1	269.05	518.106	C24H22O13	[M-H]-	-	Emodin 8-O-(6'-O-malonyl)-beta-D-glucopyranoside	Quinones	Anthraquinone	-	2	124980
mws4046	Positive	613.18	451	612.169	C27H32O16	[M+H]+	-	Safflomin A	Quinones	Quinones	78281-02-4	1	449600
pmp001299	Positive	615.17	123	614.164	C30H30O14	[M+H]+	-	Safflomin C	Quinones	Quinones	126093-98-9	1	727230
Lmdn004267	Negative	357.13	151.04	358.142	C20H22O6	[M-H]-	-	Epipinoresinol*	Lignans and Coumarins	Lignans	24404-50-0	1	576890
mws0097	Negative	357.13	151.04	358.142	C20H22O6	[M-H]-	C05366	Pinoresinol*	Lignans and Coumarins	Lignans	487-36-5	1	841060
Hmgn004693	Negative	371.11	327.03	372.121	C20H20O7	[M-H]-	-	(8'R,7'S)-(-)-8-Hydroxy-α-conidendrin	Lignans and Coumarins	Lignans	-	2	36362
Hmln003169	Negative	387.14	329.14	388.153	C21H24O7	[M-H]-	C10891	Trachelogenin	Lignans and Coumarins	Lignans	34209-69-3	2	558770
MWS20152	Negative	417.16	402.1	418.163	C22H26O8	[M-H]-	C10889	Syringaresinol	Lignans and Coumarins	Lignans	21453-71-4	1	121790
pmp000682	Positive	538.22	359.14	520.168	C26H32O11	[M+NH4]+	-	Matairesinol-4'-O-glucoside (Matairesinoside)	Lignans and Coumarins	Lignans	23202-85-9	2	53439
pmn001378	Negative	519.19	357.14	520.194	C26H32O11	[M-H]-	C17529	Pinoresinol-4-O-glucoside	Lignans and Coumarins	Lignans	41607-20-9	1	536510
Lmtn002596	Negative	521.2	359.14	522.21	C26H34O11	[M-H]-	-	Dihydrodehydrodiconiferyl alcohol-4-O-glucoside	Lignans and Coumarins	Lignans	-	3	57661
HJN083	Negative	521.2	359.15	522.211	C26H34O11	[M-H]-	-	Lariciresinol-4'-O-glucoside	Lignans and Coumarins	Lignans	143663-00-7	1	46445
Lmtn003096	Negative	523.21	361.14	524.226	C26H36O11	[M-H]-	-	Secoisolariciresinol 4-O-glucoside	Lignans and Coumarins	Lignans	-	3	231790
Hmln002100	Negative	535.18	373.13	536.189	C26H32O12	[M-H]-	-	Nortrachelogenin-4-O-glucoside	Lignans and Coumarins	Lignans	33464-78-7	2	59150
Hmln002355	Negative	549.2	387.15	550.204	C27H34O12	[M-H]-	-	5'-Methoxymatairesinoside	Lignans and Coumarins	Lignans	1691201-82-7	2	66669
pmn001371	Negative	549.2	387.15	550.205	C27H34O12	[M-H]-	C10560	Eucommin A	Lignans and Coumarins	Lignans	99633-12-2	2	179080
Rfmb25702	Negative	561.2	357.13	562.205	C28H34O12	[M-H]-	-	Pinoresinol-4-O-(6''-acetyl)glucoside	Lignans and Coumarins	Lignans	-	1	59919
Rfmb26201	Negative	621.22	417.16	622.226	C30H38O14	[M-H]-	-	Syringaresinol-4'-O-(6''-acetyl)glucoside	Lignans and Coumarins	Lignans	-	1	1409400
Cmqn003939	Negative	741.26	501.17	742.268	C34H46O18	[M-H]-	-	liriodendrin;Syringaresinol-di-O-glucoside	Lignans and Coumarins	Lignans	573-44-4	2	16135
mws1012	Positive	147.04	103	146.037	C9H6O2	[M+H]+	C05851	Coumarin	Lignans and Coumarins	Coumarins	91-64-5	2	34475
pme2987	Negative	147.05	119	148.052	C9H8O2	[M-H]-	C02274	3,4-Dihydrocoumarin	Lignans and Coumarins	Coumarins	119-84-6	2	70301
Zmpn003044	Negative	161.03	133.03	162.032	C9H6O3	[M-H]-	C09315	Umbelliferone	Lignans and Coumarins	Coumarins	93-35-6	2	346940
mws1013	Negative	177.02	133.2	178.027	C9H6O4	[M-H]-	C09263	Esculetin	Lignans and Coumarins	Coumarins	305-01-1	1	2614300
MWSmce017	Positive	179.03	133.03	178.14	C9H6O4	[M+H]+	C03093	Daphnetin	Lignans and Coumarins	Coumarins	486-35-1	2	882440
mws1668	Positive	187.04	131	186.032	C11H6O3	[M+H]+	C09060	Angelicin	Lignans and Coumarins	Coumarins	523-50-2	2	98277
pme3553	Positive	187.04	131	186.032	C11H6O3	[M+H]+	C09305	Psoralen	Lignans and Coumarins	Coumarins	66-97-7	2	105100
MWSHY0172	Positive	191.07	135.08	190.063	C11H10O3	[M+H]+	-	4-Methylherniarin	Lignans and Coumarins	Coumarins	2555-28-4	2	256040
Hmcp002123	Positive	193.05	178.02	192.042	C10H8O4	[M+H]+	C18079	Isoscopoletin (6-Hydroxy-7-Methoxycoumarin)	Lignans and Coumarins	Coumarins	776-86-3	1	757550
pme2993	Positive	193.05	133	192.042	C10H8O4	[M+H]+	C01752	Scopoletin (7-Hydroxy-5-methoxycoumarin)	Lignans and Coumarins	Coumarins	92-61-5	1	249930
mws1579	Positive	217.05	202	216.042	C12H8O4	[M+H]+	C01864	8-Methoxypsoralen	Lignans and Coumarins	Coumarins	298-81-7	2	271300
pmp000284	Positive	223.06	208.04	222.053	C11H10O5	[M+H]+	C17479	Fraxidin (8-Hydroxy-6,7-dimethoxycoumarin)	Lignans and Coumarins	Coumarins	525-21-3	3	114140
Zmbp007538	Positive	231.1	175.04	230.094	C14H14O3	[M+H]+	-	osthenol	Lignans and Coumarins	Coumarins	484-14-0	3	14432
Hmlp006964	Positive	237.07	176.04	236.068	C12H12O5	[M+H]+	-	5,6,7-Trimethoxycoumarin	Lignans and Coumarins	Coumarins	55085-47-7	2	240290
MWSmce061	Positive	237.07	176.04	236.22	C12H12O5	[M+H]+	-	Dimethylfraxetin	Lignans and Coumarins	Coumarins	6035-49-0	2	227920
Zmbp007405	Positive	247.06	217.01	246.053	C13H10O5	[M+H]+	-	isopimpinellin	Lignans and Coumarins	Coumarins	-	3	27043
Zmbp008930	Positive	263.09	203.07	262.084	C14H14O5	[M+H]+	-	Qianhucoumarin G	Lignans and Coumarins	Coumarins	13895-92-6	3	22593
Zmbp009086	Positive	271.1	203.03	270.089	C16H14O4	[M+H]+	-	imperatorin	Lignans and Coumarins	Coumarins	482-44-0	3	2804.5
MWSmce085	Negative	313.04	298.02	314.25	C16H10O7	[M-H]-	C10541	Wedelolactone	Lignans and Coumarins	Coumarins	524-12-9	2	3190400
mws1015	Negative	339.07	177	340.079	C15H16O9	[M-H]-	C09264	Esculin (6,7-DihydroxyCoumarin-6-glucoside)	Lignans and Coumarins	Coumarins	531-75-9	2	51313
pmp001220	Positive	353.1	335.1	352.095	C20H16O6	[M+H]+	-	Bavacumestan A	Lignans and Coumarins	Coumarins	-	3	90691
Lmgp003270	Positive	369.16	177.06	368.074	C16H16O10	[M+H]+	-	Scopoletin-7-O-glucuronide	Lignans and Coumarins	Coumarins	132752-65-9	2	2438100
Hmap010529	Positive	383.22	163.04	382.214	C24H30O4	[M+H]+	-	farnesiferol B	Lignans and Coumarins	Coumarins	-	3	11483
Hmap007816	Positive	383.22	163.04	382.214	C24H30O4	[M+H]+	-	feselol	Lignans and Coumarins	Coumarins	51020-36-1	3	2674.7
Hmap209946	Positive	383.22	163.04	382.214	C24H30O4	[M+H]+	-	Farnesiferol A	Lignans and Coumarins	Coumarins	-	3	26216
Hmap010207	Positive	385.23	163.04	384.23	C24H32O4	[M+H]+	-	fekrynol	Lignans and Coumarins	Coumarins	-	3	3383.7
Hmap008483	Positive	401.23	163.04	400.225	C24H32O5	[M+H]+	-	Ferukrin	Lignans and Coumarins	Coumarins	62742-67-0	3	4774.7
Hmap007276	Positive	401.23	163.04	400.225	C24H32O5	[M+H]+	-	Feshurin	Lignans and Coumarins	Coumarins	54165-75-2	3	10796
Hmap008864	Positive	425.22	163.04	424.225	C26H32O5	[M+H]+	-	badrakemin acetate	Lignans and Coumarins	Coumarins	-	3	19070
Zmbp003916	Positive	427.16	247.1	426.153	C20H26O10	[M+H]+	-	Praeroside VI	Lignans and Coumarins	Coumarins	-	3	28298
Lmbn002644	Negative	119.05	93.03	120.058	C8H8O	[M-H]-	C06758	4-Methylbenzaldehyde	Others	Others	104-87-0	2	15126
pmp000509	Positive	127.04	109.02	126.032	C6H6O3	[M+H]+	C11918	Maltol	Others	Others	118-71-8	2	167360
MWSHY0141	Positive	163.04	107.05	162.032	C9H6O3	[M+H]+	-	7-Hydroxy-4H-chromen-4-one	Others	Others	59887-89-7	2	134190
Hmsp003093	Positive	179.03	77.04	178.027	C9H6O4	[M+H]+	-	3,7-Dihydroxychromen-4-one	Others	Others	-	2	2741000
pmp000243	Positive	189.09	143.08	188.084	C12H12O2	[M+H]+	-	E-Butylphthalide	Others	Others	-	1	179200
pmp000017	Positive	189.09	143.08	188.084	C12H12O2	[M+H]+	C16924	Z-Butylidenephthalide	Others	Others	72917-31-8	1	56372
pmn001380	Negative	187.1	169.09	188.105	C9H16O4	[M-H]-	C17878	Eucommiol	Others	Others	55930-44-4	1	4927200
MWSmce250	Positive	189.09	128.06	188.22	C12H12O2	[M+H]+	-	3-Butylidenephthalide	Others	Others	551-08-6	1	458200
mws1611	Positive	191.11	117.07	190.099	C12H14O2	[M+H]+	C16987	Z-Ligustilide	Others	Others	4431-01-0	1	5858100
pmp001232	Positive	191.11	135	190.099	C12H14O2	[M+H]+	-	Neoligustilide	Others	Others	-	1	2684600
pmp001227	Positive	193.12	105.1	192.115	C12H16O2	[M+H]+	C17853	Senkyunolide A	Others	Others	63038-10-8	1	586810
pmp001235	Positive	195.14	79.1	194.131	C12H18O2	[M+H]+	-	Cinidilide	Others	Others	-	2	7265400
pmp001228	Positive	205.09	141.07	204.079	C12H12O3	[M+H]+	C09921	Senkyunolide B	Others	Others	93236-67-0	3	271910
pmp001236	Positive	207.07	121.1	206.058	C11H10O4	[M+H]+	-	Clove chromone	Others	Others	-	3	26491
pmp000250	Positive	189.09	105.07	206.084	C12H14O3	[M-H2O+H]+	-	Z-6,7-Epoxyligustilide	Others	Others	-	1	503650
Lmdn008257	Negative	205.09	161.1	206.094	C12H14O3	[M-H]-	-	Senkyunolide F	Others	Others	-	1	2943100
Lmdn008401	Negative	207.1	161.1	208.11	C12H16O3	[M-H]-	-	Senkyunolide G	Others	Others	94530-85-5	1	3812700
pmp001229	Positive	209.12	125.1	208.11	C12H16O3	[M+H]+	-	Senkyunolide K	Others	Others	114569-33-4	1	764440
pmp000251	Positive	207.1	119.09	224.093	C12H16O4	[M-H2O+H]+	-	E-6,7-Dihydroxydihydroligustilide	Others	Others	-	1	6143700
pmp000253	Positive	207.1	119.08	224.093	C12H16O4	[M-H2O+H]+	-	Senkyunolide H	Others	Others	94596-27-7	1	2068700
pmp000254	Positive	237.11	149.06	236.105	C13H16O4	[M+H]+	-	Z-6-Hydroxy-7-methoxydihydroligustilide	Others	Others	-	3	13160
Lmdn005719	Negative	239.09	177.09	240.1	C12H16O5	[M-H]-	-	Senkyunolide R	Others	Others	172549-37-0	1	559750
Lmdn005449	Negative	239.09	195.1	240.1	C12H16O5	[M-H]-	-	Senkyunolide S	Others	Others	172723-28-3	3	864640
Lmdn008572	Negative	241.06	161.1	242.071	C12H15ClO3	[M-H]-	-	Senkyunolide L	Others	Others	114586-51-5	3	344570
Hmsp004056	Positive	273.08	255.06	272.068	C15H12O5	[M+H]+	-	Protosappanin A	Others	Others	-	3	9847.4
pmp001230	Positive	279.16	121	278.152	C16H22O4	[M+H]+	-	Senkyunolide M	Others	Others	146986-60-9	1	942760
Zmkp004743	Positive	287.08	272.06	286.084	C16H14O5	[M+H]+	-	kushenin	Others	Others	-	1	2062900
Hmsp005265	Positive	289.11	123.04	288.1	C16H16O5	[M+H]+	-	3'-Deoxysappanol	Others	Others	-	2	56586
Lmdp011300	Positive	289.14	189.09	288.136	C17H20O4	[M+H]+	-	Angeloyl Senkyunolide F	Others	Others	112899-64-6	3	12187
Hmyp002315	Positive	303.04	257.04	302.042	C15H10O7	[M+H]+	-	3,5,7,4'-Tetrahydroxy-Coumaronochromone	Others	Others	-	3	47477
Hmsp004125	Positive	303.09	123.04	302.079	C16H14O6	[M+H]+	-	3'-Deoxy-4-O-methylsappanol	Others	Others	-	2	435490
Jmbn003691	Negative	311.11	59.01	312.121	C15H20O7	[M-H]-	-	3,4-dihydroxy-allylbenzene-3-O-β-D-glucopyranoside	Others	Others	-	2	85145
Smcp000882	Positive	328.13	310.12	327.132	C15H21NO7	[M+H]+	-	N-benzoyl-2-aminoethyl-β-D-glucopyranoside	Others	Others	-	1	12283000
mws4113	Negative	353.14	295.06	354.147	C21H22O5	[M-H]-	-	3'-Hydroxy-4'-O-methylglabridin	Others	Others	175554-11-7	3	4150.9
Hmgp007733	Positive	367.12	261.12	366.11	C21H18O6	[M+H]+	-	Hedysarimcoumestan D	Others	Others	-	2	210650
Hmgn002833	Negative	371.11	297.11	372.12	C20H20O7	[M-H]-	-	4-Ketopinoresinol	Others	Others	-	1	192080
pmp000305	Positive	375.14	275.1	374.137	C20H22O7	[M+H]+	-	Ledebouriellol	Others	Others	84272-83-3	2	34013
pmp000259	Positive	381.21	231.17	380.199	C24H28O4	[M+H]+	-	Z,Z9-3.39,8.89-Diligustilide	Others	Others	-	3	193550
pmp000255	Positive	381.21	293.15	380.199	C24H28O4	[M+H]+	-	Z,Z9-6.89,7.39-Diligustilide	Others	Others	-	1	153830
Lmdp011777	Positive	381.21	191.11	380.199	C24H28O4	[M+H]+	-	Z-6.8',7.3'-Diligustilide	Others	Others	89354-45-0	1	749070
pmp000258	Positive	381.21	145.1	380.199	C24H28O4	[M+H]+	-	Z-Ligustilide dimer E-232	Others	Others	-	2	60722
pmp000256	Positive	381.21	173.1	380.199	C24H28O4	[M+H]+	-	Angelicide	Others	Others	92935-94-9	1	265120
Lmdp012016	Positive	383.22	191.11	382.214	C24H30O4	[M+H]+	-	Senkyunolide P	Others	Others	142864-23-1	1	1421800
pmn001423	Negative	385.19	223.13	386.194	C19H30O8	[M-H]-	-	Roseoside	Others	Others	54835-70-0	2	242510
HJN088	Negative	431.12	125.03	432.126	C18H24O12	[M-H]-	-	Licoagroside B	Others	Others	-	2	504770
HJN096	Negative	577.16	145.03	578.163	C27H30O14	[M-H]-	-	Soyamaloside B	Others	Others	-	3	362690
pmp000555	Positive	827.48	143.1	826.471	C43H70O15	[M+H]+	-	Cyclocephaloside	Others	Others	215776-78-6	3	920480
pmp001302	Positive	1045.3	433.1	1044.23	C48H52O26	[M+H]+	-	Anhydrosafflor yellow B	Others	Others	184840-84-4	1	2141800
Zmyn000268	Negative	89.02	71.02	90.032	C3H6O3	[M-H]-	C02154	2,3-Dihydroxypropanal	Others	Saccharides and Alcohols	56-82-6	3	42320
pmf0256	Negative	101.1	84.7	102.104	C6H14O	[M-H]-	-	3-Methyl-1-pentanol	Others	Saccharides and Alcohols	589-35-5	3	337910
MWS4305	Negative	119.04	59.01	120.042	C4H8O4	[M-H]-	C01796	Erythrose	Others	Saccharides and Alcohols	583-50-6	3	15876
pma0134	Positive	121.04	93.06	120.042	C4H8O4	[M+H]+	C06463	D-(-)-Threose	Others	Saccharides and Alcohols	95-43-2	3	86317
Lmbn000198	Negative	133.01	71.01	134.022	C4H6O5	[M-H]-	C03064	3-Dehydro-L-Threonic Acid	Others	Saccharides and Alcohols	-	1	11107000
mws0889	Negative	135.03	75.01	136.037	C4H8O5	[M-H]-	C21649	D-Threonic Acid	Others	Saccharides and Alcohols	3909-12-4	3	443030
Zmyn000230	Negative	147.03	57.03	148.037	C5H8O5	[M-H]-	C00684	2-Dehydro-3-deoxy-L-arabinonate	Others	Saccharides and Alcohols	-	1	710450
ML10171848	Negative	147.03	85.03	148.037	C5H8O5	[M-H]-	C00652	D-Arabinono-1,4-lactone	Others	Saccharides and Alcohols	2782-09-4	3	717350
Zmgn000173	Negative	149.05	75.01	150.053	C5H10O5	[M-H]-	C00121	D-Ribose	Others	Saccharides and Alcohols	50-69-1	3	60698
mws1499	Negative	149.05	59.01	150.053	C5H10O5	[M-H]-	C00216	D-Arabinose	Others	Saccharides and Alcohols	10323-20-3	2	168160
MWSmce199	Negative	149.05	59.02	150.13	C5H10O5	[M-H]-	C01510	L-Xylose	Others	Saccharides and Alcohols	609-06-3	3	155990
mws0437	Negative	151.06	71	152.068	C5H12O5	[M-H]-	C01904	D-Arabitol	Others	Saccharides and Alcohols	488-82-4	3	38514
mws0213	Negative	151.06	71	152.068	C5H12O5	[M-H]-	C00474	Ribitol	Others	Saccharides and Alcohols	488-81-3	3	72576
pmf0174	Negative	157.16	157.2	158.167	C10H22O	[M-H]-	C01633	1-Decanol*	Others	Saccharides and Alcohols	112-30-1	3	3290900
pmf0175	Negative	157.16	157.2	158.167	C10H22O	[M-H]-	-	2-Decanol*	Others	Saccharides and Alcohols	1120-06-5	3	3211500
MWS0559	Negative	161.05	71.01	162.053	C6H10O5	[M-H]-	-	1,6-anhydro-β-D-glucose	Others	Saccharides and Alcohols	498-07-7	3	75893
pme2529	Negative	163.2	101	164.068	C6H12O5	[M-H]-	C07326	1,5-Anhydro-D-glucitol	Others	Saccharides and Alcohols	154-58-5	3	42450
mws0854	Negative	163	59.01	164.068	C6H12O5	[M-H]-	C00507	Rhamnose	Others	Saccharides and Alcohols	3615-41-6	3	55266
mws1595	Negative	163.06	118.6	164.068	C6H12O5	[M-H]-	C01018	D-Fucose	Others	Saccharides and Alcohols	3615-37-0	3	20934
mws0344	Negative	165.04	75	166.048	C5H10O6	[M-H]-	C00502	D-Xylonic acid	Others	Saccharides and Alcohols	526-91-0	1	2116200
MWSmce165	Negative	165.08	59.02	166.17	C6H14O5	[M-H]-	-	L-Fucitol	Others	Saccharides and Alcohols	13074-06-1	2	623950
Zmzn000078	Negative	168.99	78.96	169.998	C3H7O6P	[M-H]-	C00111	Dihydroxyacetone phosphate	Others	Saccharides and Alcohols	57-04-5	3	122810
mws1208	Positive	175.17	157	174.162	C10H22O2	[M+H]+	-	1,10-Decanediol	Others	Saccharides and Alcohols	112-47-0	3	17482
mws4175	Negative	175.02	85.03	176.032	C6H8O6	[M-H]-	C02670	D-Glucurono-6,3-lactone	Others	Saccharides and Alcohols	32449-92-6	2	149000
pme1021	Negative	177.14	99	178.048	C6H10O6	[M-H]-	C00198	D-Glucono-1,5-lactone	Others	Saccharides and Alcohols	90-80-2	3	17027
pmb0786	Positive	180.09	163.06	179.079	C6H13NO5	[M+H]+	C00329	D-Glucosamine	Others	Saccharides and Alcohols	3416-24-8	3	1718900
pmf0139	Negative	179.06	59	180.063	C6H12O6	[M-H]-	C00124	D-Galactose*	Others	Saccharides and Alcohols	59-23-4	1	2194300
mws4170	Negative	179.06	59.01	180.063	C6H12O6	[M-H]-	C00031	D-Glucose*	Others	Saccharides and Alcohols	14431-43-7	1	5178700
pme0516	Negative	179.06	87	180.063	C6H12O6	[M-H]-	C00137	Inositol*	Others	Saccharides and Alcohols	87-89-8	1	501710
pmf0138	Negative	179.06	59	180.063	C6H12O6	[M-H]-	C00159	D-Mannose*	Others	Saccharides and Alcohols	3458-28-4	1	4090400
mws1164	Negative	179.06	59.01	180.063	C6H12O6	[M-H]-	C05003	D-Fructose*	Others	Saccharides and Alcohols	7660-25-5	1	4562200
mws0214	Negative	181.07	71	182.079	C6H14O6	[M-H]-	C00794	D-Sorbitol*	Others	Saccharides and Alcohols	50-70-4	2	221970
mws1155	Negative	181.07	101.02	182.079	C6H14O6	[M-H]-	C00392	D-Mannitol*	Others	Saccharides and Alcohols	69-65-8	2	100610
pme2237	Negative	181.07	101	182.079	C6H14O6	[M-H]-	C01697	Dulcitol*	Others	Saccharides and Alcohols	608-66-2	2	219260
Zmgn000447	Negative	184.98	78.96	185.993	C3H7O7P	[M-H]-	C00197	3-Phospho-D-glyceric acid	Others	Saccharides and Alcohols	820-11-1	2	303000
pmf0348	Negative	187.13	97	188.141	C10H20O3	[M-H]-	-	2,6-Dimethyl-7-octene-2,3,6-triol	Others	Saccharides and Alcohols	73815-21-1	3	6891700
mws1189	Negative	193.04	72.8	194.033	C6H10O7	[M-H]-	C00333	D-Galacturonic acid	Others	Saccharides and Alcohols	685-73-4	3	211940
pme3705	Negative	193.04	73	194.043	C6H10O7	[M-H]-	C00191	D-Glucoronic acid	Others	Saccharides and Alcohols	6556-12-3	2	308720
pme0534	Negative	195.05	74.9	196.058	C6H12O7	[M-H]-	C00257	Gluconic acid	Others	Saccharides and Alcohols	526-95-4	1	7428900
Zmzn000079	Negative	199	78.96	200.009	C4H9O7P	[M-H]-	C00279	D-Erythrose-4-phosphate	Others	Saccharides and Alcohols	585-18-2	3	445320
pme1261	Positive	206.14	76	205.131	C9H19NO4	[M+H]+	C05944	D-Panthenol	Others	Saccharides and Alcohols	81-13-0	2	9707.4
Zmyn000108	Negative	209.03	85.03	210.038	C6H10O8	[M-H]-	C00818	D-Saccharic acid	Others	Saccharides and Alcohols	87-73-0	1	1025600
Zmpn000199	Negative	209.03	85.03	210.038	C6H10O8	[M-H]-	C00879	D-Galactaric acid	Others	Saccharides and Alcohols	526-99-8	2	1366900
mws2608	Positive	222.1	84.05	221.09	C8H15NO6	[M+H]+	C01132	N-Acetyl-D-galactosamine*	Others	Saccharides and Alcohols	1811-31-0	2	70023
pme2755	Positive	222	144	221.09	C8H15NO6	[M+H]+	C00140	N-Acetyl-D-glucosamine*	Others	Saccharides and Alcohols	7512-17-6	2	520180
pma6455	Negative	229.01	96.97	230.02	C5H11O8P	[M-H]-	C00117	Ribulose-5-phosphate	Others	Saccharides and Alcohols	4300-28-1	3	232910
Zmyn000110	Negative	258.04	78.96	259.046	C6H14NO8P	[M-H]-	C06156	D-Glucosamine 1-phosphate	Others	Saccharides and Alcohols	2152-75-2	3	121110
mws1090	Negative	259.02	97	260.03	C6H13O9P	[M-H]-	C00103	Glucose-1-phosphate*	Others	Saccharides and Alcohols	59-56-3	1	2574300
pme3313	Negative	259	97	260.03	C6H13O9P	[M-H]-	C00085	D-Fructose 6-phosphate*	Others	Saccharides and Alcohols	643-13-0	1	1916600
mws0866	Negative	259.02	97	260.03	C6H13O9P	[M-H]-	C00092	D-Glucose 6-phosphate*	Others	Saccharides and Alcohols	56-73-5	1	2357300
Zmpn000095	Negative	261.04	78.96	262.045	C6H15O9P	[M-H]-	C01096	Sorbitol-6-phosphate	Others	Saccharides and Alcohols	20479-58-7	3	62927
pmb3081	Negative	289	97	290.004	C6H11PO11	[M-H]-	-	Glucarate O-Phosphoric acid	Others	Saccharides and Alcohols	-	3	4294800
pme3163	Negative	289	97	290.04	C7H15O10P	[M-H]-	-	D-Sedoheptuiose 7-phosphate	Others	Saccharides and Alcohols	2646-35-7	3	2386300
pmf0314	Negative	289.25	157	290.261	C20H34O	[M-H]-	-	(+)-cis-Abienol	Others	Saccharides and Alcohols	17990-16-8	3	10605
pmb3079	Negative	300.05	96.9	301.056	C8H16NO9P	[M-H]-	C04256	N-Acetyl-D-glucosamine-1-phosphate	Others	Saccharides and Alcohols	6866-69-9	3	60240
Lmqn000351	Negative	325.11	59.01	326.121	C12H22O10	[M-H]-	C08247	Rutinose	Others	Saccharides and Alcohols	90-74-4	3	28088
Lmqn000432	Negative	333.06	333.06	334.067	C9H19O11P	[M-H]-	-	1-(sn-Glycero-3-phospho)-1D-myo-inositol	Others	Saccharides and Alcohols	-	2	1346400
Zmyn000083	Negative	338.99	78.96	339.996	C6H14O12P2	[M-H]-	C01231	D-Glucose 1,6-bisphosphate	Others	Saccharides and Alcohols	10139-18-1	2	269990
Lmsn000381	Negative	341.11	89.02	342.116	C12H22O11	[M-H]-	C01971	D-Maltose*	Others	Saccharides and Alcohols	133-99-3	1	10609000
mws5038	Negative	341.11	89.02	342.116	C12H22O11	[M-H]-	C01742	Isomaltulose*	Others	Saccharides and Alcohols	13718-94-0	1	7334400
mws0264	Negative	341.11	119	342.116	C12H22O11	[M-H]-	C01083	D-Trehalose*	Others	Saccharides and Alcohols	99-20-7	1	5944500
mws1333	Negative	341.11	113	342.116	C12H22O11	[M-H]-	C05402	Melibiose*	Others	Saccharides and Alcohols	585-99-9	1	2690000
Zmjn000425	Negative	341.11	89.02	342.116	C12H22O11	[M-H]-	C07064	D-Lactulose*	Others	Saccharides and Alcohols	4618-18-2	1	12121000
MA10039641	Negative	341.11	89.02	342.116	C12H22O11	[M-H]-	C00243	Lactobiose*	Others	Saccharides and Alcohols	63-42-3	1	9342200
pme0519	Negative	341.11	119.03	342.116	C12H22O11	[M-H]-	C00089	D-Sucrose*	Others	Saccharides and Alcohols	57-50-1	1	15794000
mws1080	Negative	341.11	179	342.116	C12H22O11	[M-H]-	C01235	Galactinol*	Others	Saccharides and Alcohols	3687-64-7	1	19134000
MWSmce203	Negative	341.12	73.03	342.3	C12H22O11	[M-H]-	-	D-(+)-Cellobiose*	Others	Saccharides and Alcohols	528-50-7	2	100110
MWS1983	Negative	343.12	89.03	344.132	C12H24O11	[M-H]-	-	Maltitol	Others	Saccharides and Alcohols	585-88-6	3	170720
MWSslk074	Negative	343.12	59.01	344.31	C12H24O11	[M-H]-	-	Lactitol	Others	Saccharides and Alcohols	585-86-4	2	8137700
mws1089	Negative	421.1	241	422.083	C12H23O14P	[M-H]-	-	Sucrose-6-phosphate*	Others	Saccharides and Alcohols	-	3	3312700
mws2523	Negative	421.08	241.1	422.083	C12H23O14P	[M-H]-	C00689	Trehalose 6-phosphate*	Others	Saccharides and Alcohols	4484-88-2	1	1341200
mws1589	Negative	503.16	179	504.169	C18H32O16	[M-H]-	C00713	D-Panose*	Others	Saccharides and Alcohols	33401-87-5	1	38308
pme2125	Negative	503.16	179	504.169	C18H32O16	[M-H]-	C00492	Raffinose*	Others	Saccharides and Alcohols	512-69-6	2	108010
pme0500	Negative	503.16	323	504.169	C18H32O16	[M-H]-	C08243	D-Melezitose*	Others	Saccharides and Alcohols	597-12-6	2	75868
MWSmce486	Negative	503.16	383.12	504.44	C18H32O16	[M-H]-	C05404	Manninotriose*	Others	Saccharides and Alcohols	13382-86-0	2	20792
pmb2653	Negative	649.1	145	650.227	C24H42O20	[M-H]-	-	D(+)-Melezitose O-rhamnoside	Others	Saccharides and Alcohols	-	3	97236
mws4163	Negative	665.21	485.3	666.222	C24H42O21	[M-H]-	-	Nystose	Others	Saccharides and Alcohols	13133-07-8	3	32277
Lmqn000213	Negative	665.21	341.11	666.222	C24H42O21	[M-H]-	C01613	Stachyose	Others	Saccharides and Alcohols	470-55-3	3	77696
MWSmce598	Positive	829.28	325.11	828.72	C30H52O26	[M+H]+	-	Maltopentaose	Others	Saccharides and Alcohols	34620-76-3	3	9168.5
mws0133	Positive	123.06	80.05	122.048	C6H6N2O	[M+H]+	C00153	Nicotinamide	Others	Vitamin	98-92-0	1	18737000
pme0490	Positive	124.04	78	123.032	C6H5NO2	[M+H]+	C00253	Nicotinic acid (Vitamin B3)*	Others	Vitamin	59-67-6	1	7947000
MWSmce039	Positive	124.04	84.05	123.11	C6H5NO2	[M+H]+	C07446	Isonicotinic acid*	Others	Vitamin	55-22-1	1	32494
pme2165	Negative	155.01	111	156.017	C5H4N2O4	[M-H]-	C00295	Orotic acid	Others	Vitamin	65-86-1	3	493940
Zmjp000624	Positive	168.06	150.05	167.058	C8H9NO3	[M+H]+	C00250	Pyridoxal	Others	Vitamin	66-72-8	3	194500
pme1383	Positive	170.08	134.1	169.074	C8H11NO3	[M+H]+	C00314	Pyridoxine	Others	Vitamin	65-23-6	2	1926700
MA10039492	Negative	173.01	71.03	174.016	C6H6O6	[M-H]-	C05422	Dehydroascorbic acid	Others	Vitamin	490-83-5	3	12635
Hmfn000531	Negative	175.02	87.01	176.032	C6H8O6	[M-H]-	C00072	L-Ascorbic acid (Vitamin C)	Others	Vitamin	50-81-7	3	249930
pme2596	Positive	184.06	148	183.053	C8H9NO4	[M+H]+	C00847	4-Pyridoxic acid	Others	Vitamin	82-82-6	3	143630
mws1337	Positive	220.12	202.1	219.111	C9H17NO5	[M+H]+	C00864	D-Pantothenic Acid	Others	Vitamin	79-83-4	1	3075700
pme2266	Positive	245.1	227	244.088	C10H16N2O3S	[M+H]+	C00120	Biotin	Others	Vitamin	58-85-5	2	74133
mws0655	Negative	246.02	96.9	247.025	C8H10NO6P	[M-H]-	C00018	Pyridoxal-5'-phosphate	Others	Vitamin	54-47-7	3	27514
pma3101	Positive	256.2	124.1	256.082	C11H14NO6+	[M+H]+	C05841	Nicotinate D-ribonucleoside	Others	Vitamin	17720-18-2	3	2187300
pmb0952	Positive	265.1	122.1	265.112	C12H17N4OS+	[M+H]+	C00378	Thiamine (Vitamin B1)	Others	Vitamin	70-16-6	3	2315800
pma1751	Positive	286.09	124	285.085	C12H15NO7	[M+H]+	-	N-(beta-D-Glucosyl)nicotinate	Others	Vitamin	-	3	110390
pmb0789	Positive	332.13	152.07	331.127	C14H21NO8	[M+H]+	C03996	Pyridoxine-5'-O-glucoside	Others	Vitamin	-	2	303230
pmb0801	Positive	346.11	184.1	345.106	C14H19NO9	[M+H]+	-	4-Pyridoxic acid-O-glucoside	Others	Vitamin	-	3	166740
mws0232	Positive	377.15	243.09	376.138	C17H20N4O6	[M+H]+	C00255	Riboflavin (Vitamin B2)	Others	Vitamin	83-88-5	1	6032400
pmf0248	Positive	403.36	373.1	402.35	C27H46O2	[M+H]+	C14151	Delta-Tocopherol	Others	Vitamin	119-13-1	3	8022.7
mws0430	Negative	440.13	311.09	441.14	C19H19N7O6	[M-H]-	C00504	Folic acid	Others	Vitamin	59-30-3	3	14936
pme1014	Positive	445.3	341.3	444.303	C31H40O2	[M+H]+	-	Menatetrenone (Vitamin K2)	Others	Vitamin	11032-49-8	3	67941
MWSmce674	Positive	451.36	89.06	450.7	C31H46O2	[M+H]+	-	Vitamin K1	Others	Vitamin	84-80-0	3	18131
pme2246	Negative	301	185.02	302.006	C14H6O8	[M-H]-	C10788	Ellagic acid	Tannins	Tannin	476-66-4	2	40871
Lmqn004838	Negative	315.01	299.99	316.022	C15H8O8	[M-H]-	-	3-O-Methylellagic acid	Tannins	Tannin	-	2	521100
pme2268	Positive	138.05	94.07	137.048	C7H7NO2	[M+H]+	C01004	Trigonelline	Alkaloids	Pyridine alkaloids	535-83-1	1	27759000
YC512115	Positive	325.15	163.13	324.147	C19H20N2O3	[M+H]+	-	Nicotine-N-glucoside	Alkaloids	Pyridine alkaloids	911474-72-1	1	74954
Lmtp003663	Positive	401.13	250.07	400.127	C20H20N2O7	[M+H]+	-	Pyridylcarbonylprunasin	Alkaloids	Pyridine alkaloids	-	3	14391
Lmtp002344	Positive	581.2	430.14	580.19	C26H32N2O13	[M+H]+	-	Pyridylcarbonyl-2-glucosyl-glucosyloxy-2-phenylacetic acid amide	Alkaloids	Pyridine alkaloids	-	3	11471
MWSmce157	Positive	144.1	58.06	143.18	C7H13NO2	[M+H]+	C10172	Stachydrine	Alkaloids	Pyrrole alkaloids	471-87-4	1	735080
Lmgp000796	Positive	150.06	61.01	149.048	C8H7NO2	[M+H]+	C00650	4-Hydroxymandelonitrile	Alkaloids	Phenolamine	13093-65-7	2	2373500
Hmlp000935	Positive	154.09	137.06	153.078	C8H11NO2	[M+H]+	C16666	Vanillylamine	Alkaloids	Phenolamine	1196-92-5	2	70888
pmb0490	Positive	235.14	147.04	234.137	C13H18N2O2	[M+H]+	C18326	p-Coumaroylputrescine	Alkaloids	Phenolamine	34136-53-3	2	71650
HJN092	Negative	409.18	259.11	410.184	C23H26N2O5	[M-H]-	-	p-Coumaroylferuloylputrescine	Alkaloids	Phenolamine	-	3	11839
mws1108	Positive	249.2	150	248.189	C15H24N2O	[M+H]+	-	Sophoridine	Alkaloids	Quinorisidine alkaloids	6882-68-4	3	43705
pmp000626	Positive	261.16	243.15	260.152	C15H20N2O2	[M+H]+	C10755	Baptifoline*	Alkaloids	Quinorisidine alkaloids	732-50-3	2	31189
pmp000627	Positive	261.16	243.15	260.152	C15H20N2O2	[M+H]+	-	Isobaptifoline*	Alkaloids	Quinorisidine alkaloids	-	2	207220
Hmsp001724	Positive	263.18	245.16	262.168	C15H22N2O2	[M+H]+	-	5α-Hydroxysophocarpine	Alkaloids	Quinorisidine alkaloids	-	3	39474
Lmyp003025	Positive	206.08	146.06	205.074	C11H11NO3	[M+H]+	-	Coixlactam	Alkaloids	Quinoline alkaloids	-	2	12595
MWSmce475	Positive	325.19	307.18	324.42	C20H24N2O2	[M+H]+	C06527	Quinidine	Alkaloids	Quinoline alkaloids	56-54-2	2	340940
pmb0484	Positive	104.1	60.1	103.091	C5H13NO	[M+H]+	C00114	Choline	Alkaloids	Alkaloids	62-49-7	2	9037300
mws0191	Positive	118.09	59	117.079	C5H11NO2	[M+H]+	C00719	Betaine	Alkaloids	Alkaloids	107-43-7	1	296640
mws0491	Positive	122.1	105	121.089	C8H11N	[M+H]+	C05332	Phenethylamine	Alkaloids	Alkaloids	64-04-0	2	14078000
pme2693	Positive	131.12	114.09	130.111	C6H14N2O	[M+H]+	C02714	N-Acetylputrescine	Alkaloids	Alkaloids	18233-70-0	2	29965
HJKP000649	Positive	136.07	91.05	135.068	C8H9NO	[M+H]+	C15561	N-benzylformamide	Alkaloids	Alkaloids	6343-54-0	3	1324500
MWS3020	Positive	145.13	86.1	144.126	C7H16N2O	[M+H]+	-	N-Acetylcadaverine	Alkaloids	Alkaloids	32343-73-0	2	31181
Lmtp003569	Positive	152.06	106.06	151.063	C8H9NO2	[M+H]+	C07301	R-mandelamide	Alkaloids	Alkaloids	24008-62-6	3	19990
MWSmce548	Positive	118.09	58.07	153.61	C5H12ClNO2	[M+H]+	-	Betaine (hydrochloride)	Alkaloids	Alkaloids	590-46-5	1	3819300
Lmmp002080	Positive	193.13	105.03	192.126	C11H16N2O	[M+H]+	-	N-(4-Aminobutyl)benzamide	Alkaloids	Alkaloids	5692-23-9	2	87208
Lmyn004144	Negative	294.1	71.01	295.106	C14H17NO6	[M-H]-	C00844	Prunasin	Alkaloids	Alkaloids	99-18-3	3	81108
mws1375	Positive	304.15	185.09	303.143	C12H21N3O6	[M+H]+	C05324	Nicotianamine	Alkaloids	Alkaloids	34441-14-0	1	305440
Lmtn001630	Negative	312.11	150.05	313.116	C14H19NO7	[M-H]-	-	2-Glucosyloxy-2-phenylacetic acid amide	Alkaloids	Alkaloids	-	3	150010
pmb2211	Positive	343.3	240.7	342.288	C19H38N2O3	[M+H]+	-	Cocamidopropyl betaine	Alkaloids	Alkaloids	4292-10-8	1	16484
mws1580	Negative	456.15	322.8	457.158	C20H27NO11	[M-H]-	C08325	Amygdalin	Alkaloids	Alkaloids	29883-15-6	1	12254000
Lmtn001569	Negative	474.16	312.1	475.169	C20H29NO12	[M-H]-	-	2-Glucosyl-glucosyloxy-2-phenylacetic acid amide	Alkaloids	Alkaloids	-	2	456180
Lmtn002267	Negative	618.2	485.14	619.211	C26H37NO16	[M-H]-	-	Mandelonitrile-sophorotrioside	Alkaloids	Alkaloids	-	2	101920
MWSmce709	Positive	130.06	103.05	129.16	C9H7N	[M+H]+	-	Isoquinoline	Alkaloids	Isoquinoline alkaloids	119-65-3	2	175510
pmb1096	Positive	118.07	91	117.058	C8H7N	[M+H]+	C00463	Indole	Alkaloids	Plumerane	120-72-9	1	241180
mws0005	Positive	161.11	144	160.1	C10H12N2	[M+H]+	C00398	Tryptamine	Alkaloids	Plumerane	61-54-1	2	1740400
Hmmp001310	Positive	188.07	118.07	187.063	C11H9NO2	[M+H]+	C21283	3-Indoleacrylic acid	Alkaloids	Plumerane	1204-06-4	2	7942200
pme2244	Positive	190.09	118.07	189.07	C11H11NO2	[M+H]+	-	3-Indolepropionic acid	Alkaloids	Plumerane	830-96-6	2	51096
Zmbp002538	Positive	205.1	146.06	204.09	C11H12N2O2	[M+H]+	-	1-Methoxy-indole-3-acetamide	Alkaloids	Plumerane	-	1	4183500
Hmcp003783	Positive	211.09	193.07	210.079	C13H10N2O	[M+H]+	-	1-Acetyl-β-carboline	Alkaloids	Plumerane	-	2	45961
Smjp001258	Positive	219.11	132.08	218.105	C12H14N2O2	[M+H]+	C02983	Abrine	Alkaloids	Plumerane	526-31-8	3	17516
Hmcp002354	Positive	227.13	121.01	226.114	C14H14N2O	[M+H]+	-	Crenatine	Alkaloids	Plumerane	26585-14-8	2	289130
pmp001297	Positive	576.17	294.1	575.164	C27H29NO13	[M+H]+	-	Cartormin	Alkaloids	Plumerane	-	2	86501
mws1429	Negative	223.13	161	224.141	C13H20O3	[M-H]-	C04166	Vomifoliol	Terpenoids	Monoterpenoids	189351-15-3	2	6031300
Lmdp002381	Positive	227.09	149.06	226.084	C11H14O5	[M+H]+	C09780	Genipin	Terpenoids	Monoterpenoids	6902-77-8	2	29614
Zmsp005502	Positive	319.12	105.03	318.11	C17H18O6	[M+H]+	C17456	Paeonilactone C	Terpenoids	Monoterpenoids	98751-77-0	2	4356300
Hmbp003172	Positive	319.12	105.03	318.111	C17H18O6	[M+H]+	C17453	Paeoniflorigenone	Terpenoids	Monoterpenoids	80454-42-8	3	758460
pmp001047	Positive	347.17	167.11	346.163	C16H26O8	[M+H]+	-	Jasminoside G	Terpenoids	Monoterpenoids	871589-35-4	2	57671
pmp001048	Positive	361.15	199.1	360.142	C16H24O9	[M+H]+	-	Ixoroside	Terpenoids	Monoterpenoids	58514-30-0	2	73267
Hmbn001505	Negative	361.15	317.16	362.158	C16H26O9	[M-H]-	-	6-O-Glucosyl-leucolactone	Terpenoids	Monoterpenoids	-	3	47675
mws1574	Negative	373.11	123	374.121	C16H22O10	[M-H]-	C11673	Geniposidic acid	Terpenoids	Monoterpenoids	27741-01-1	2	15363
Lmmp000982	Positive	377.14	151.08	376.137	C16H24O10	[M+H]+	-	8-Debenzoylpaeoniflorin	Terpenoids	Monoterpenoids	23532-11-8	1	1008800
pmp001054	Positive	422.17	225.08	404.132	C17H24O11	[M+NH4]+	C09779	Gardenoside	Terpenoids	Monoterpenoids	24512-62-7	2	86245
Hmbp003109	Positive	463.16	105.03	462.153	C23H26O10	[M+H]+	-	Lactiflorin	Terpenoids	Monoterpenoids	88623-95-4	3	110420
mws1557	Negative	479.16	121.03	480.163	C23H28O11	[M-H]-	C09959	Paeoniflorin	Terpenoids	Monoterpenoids	23180-57-6	2	16914000
mws1602	Positive	481.17	197.1	480.163	C23H28O11	[M+H]+	C17457	Albiflorin	Terpenoids	Monoterpenoids	39011-90-0	1	4371600
MWSmce497	Negative	495.15	137.03	496.46	C23H28O12	[M-H]-	-	Oxypaeoniflorin	Terpenoids	Monoterpenoids	39011-91-1	2	1398500
pmp000702	Positive	536.19	195.06	518.137	C22H30O14	[M+NH4]+	-	3'-O-D-glucosylgentiopicroside	Terpenoids	Monoterpenoids	-	2	700980
Hmbp003174	Positive	585.2	197.08	584.189	C30H32O12	[M+H]+	-	Benzoylpaeoniflorin	Terpenoids	Monoterpenoids	38642-49-8	1	5127400
Hmbn002187	Negative	631.17	491.12	632.175	C30H32O15	[M-H]-	-	6'-O-Galloyl Paeoniflorin	Terpenoids	Monoterpenoids	122965-41-7	3	1200100
Hmbp001680	Positive	643.22	197.08	642.215	C29H38O16	[M+H]+	-	6'-O-Glucosylalbiflorin	Terpenoids	Monoterpenoids	-	3	169000
pmp001093	Positive	455.21	331.1	454.199	C26H30O7	[M+H]+	-	1,2-Dihydroobacunone	Terpenoids	Ditepenoids	-	2	20848
pmn001700	Negative	455.35	455.35	456.36	C30H48O3	[M-H]-	-	24,30-Dihydroxy-12(13)-enolupinol	Terpenoids	Triterpene	-	1	15712
Lmdn006811	Negative	455.35	455.35	456.36	C30H48O3	[M-H]-	C17420	Soyasapogenol E	Terpenoids	Triterpene	6750-59-0	3	8631.2
mws4053	Negative	455.35	455.35	456.36	C30H48O3	[M-H]-	C08988	Ursolic acid*	Terpenoids	Triterpene	77-52-1	2	7907.6
MWSmce052	Negative	455.36	455.36	456.7	C30H48O3	[M-H]-	-	3-Epiursolic Acid*	Terpenoids	Triterpene	989-30-0	2	6460.6
mws1086	Negative	457.37	375.1	458.376	C30H50O3	[M-H]-	C08980	Soyasapogenol B	Terpenoids	Triterpene	595-15-3	3	250090
Lmyn012274	Negative	469.33	469.33	470.34	C30H46O4	[M-H]-	-	Semimoronic acid	Terpenoids	Triterpene	102053-38-3	2	5450.7
Lmzn006284	Negative	471.35	471.35	472.355	C30H48O4	[M-H]-	-	2α-Hydroxyursolic acid	Terpenoids	Triterpene	-	2	148150
mws1610	Negative	471.35	471.35	472.355	C30H48O4	[M-H]-	C16939	Maslinic acid	Terpenoids	Triterpene	4373-41-5	1	30227
pmn001705	Negative	471.35	471.35	472.355	C30H48O4	[M-H]-	-	3,24-Dihydroxy-17,21-semiacetal-12(13)oleanolic fruit	Terpenoids	Triterpene	-	1	59523
pmn001706	Negative	471.35	471.35	472.355	C30H48O4	[M-H]-	-	2-Hydroxyoleanolic acid	Terpenoids	Triterpene	26707-60-8	1	38536
Hmbn005207	Negative	471.35	471.35	472.355	C30H48O4	[M-H]-	-	Hederagenin	Terpenoids	Triterpene	465-99-6	2	56283
Lmsn011830	Negative	485.33	485.33	486.335	C30H46O5	[M-H]-	-	2α,19α-Dihydroxy-3-oxours-12-en-28-oic acid	Terpenoids	Triterpene	176983-21-4	2	381070
pmp000269	Positive	489.36	407.33	488.35	C30H48O5	[M+H]+	-	Arjunic Acid	Terpenoids	Triterpene	31298-06-3	2	15613
Hmjn003948	Negative	487.35	487.35	488.35	C30H48O5	[M-H]-	-	Madasiatic acid	Terpenoids	Triterpene	26532-66-1	3	44338
Hmjp003546	Positive	505.35	469.33	504.346	C30H48O6	[M+H]+	-	Madecassic acid	Terpenoids	Triterpene	18449-41-7	3	40383
pmp000405	Positive	823.41	647.38	822.404	C42H62O16	[M+H]+	-	Isoglycyrrhizic acid	Terpenoids	Triterpene	-	2	26610
Lmdp004200	Positive	635.42	423.36	634.408	C36H58O9	[M+H]+	C19763	Soyasapogenol B-3-O-glucuronide	Terpenoids	Triterpene Saponin	-	2	198460
pmn001505	Negative	763.43	763.4	764.435	C41H64O13	[M-H]-	-	Oleanolic acid-3-O-xylosyl(1→3)glucuronide	Terpenoids	Triterpene Saponin	-	2	1023700
pmp000552	Positive	785.47	143.1	784.461	C41H68O14	[M+H]+	C17799	Astragaloside IV	Terpenoids	Triterpene Saponin	84687-43-4	1	226960
pmp000551	Positive	785.47	143.1	784.461	C41H68O14	[M+H]+	C08924	Astragaloside III	Terpenoids	Triterpene Saponin	84687-42-3	1	609190
Lmdp005678	Positive	797.47	441.37	796.461	C42H68O14	[M+H]+	C19865	Soyasaponin III	Terpenoids	Triterpene Saponin	55304-02-4	1	475080
pmp000197	Positive	797.47	441.37	796.461	C42H68O14	[M+H]+	-	Soyasaponin βb'	Terpenoids	Triterpene Saponin	-	1	236930
pmp000553	Positive	827.48	143.1	826.471	C43H70O15	[M+H]+	C17798	Astragaloside II	Terpenoids	Triterpene Saponin	84676-89-1	1	3202200
MWSmce125	Positive	827.46	143.1	827.01	C43H70O15	[M+H]+	C17794	Isoastragaloside II	Terpenoids	Triterpene Saponin	86764-11-6	3	998300
pmp000556	Positive	869.49	143.1	868.482	C45H72O16	[M+H]+	C17797	Astragaloside I	Terpenoids	Triterpene Saponin	84605-18-5	1	3800200
pmp000557	Positive	869.49	217.06	868.482	C45H72O16	[M+H]+	C17793	Isoastragaloside I	Terpenoids	Triterpene Saponin	84676-88-0	3	3415100
pmp000558	Positive	911.5	143.1	910.493	C47H74O17	[M+H]+	-	Acetylastragaloside I	Terpenoids	Triterpene Saponin	84687-47-8	1	345860
Lmdn004802	Negative	911.5	911.5	912.508	C47H76O17	[M-H]-	C12081	Soyasaponin II	Terpenoids	Triterpene Saponin	55319-36-3	3	62168
pmp000198	Positive	913.52	441.37	912.508	C47H76O17	[M+H]+	-	Soyasaponin βc	Terpenoids	Triterpene Saponin	-	1	2871
pmp000511	Positive	944.55	425.37	926.466	C48H78O17	[M+NH4]+	-	Kaikasaponin II	Terpenoids	Triterpene Saponin	-	2	8606
Lmmp008478	Positive	941.51	439.36	940.503	C48H76O18	[M+H]+	-	Soyasapogenol E-3-O-rhamnosyl(1,2)glucosyl(1,2)glucuronide	Terpenoids	Triterpene Saponin	-	1	159250
pmp000200	Positive	941.51	439.35	940.503	C48H76O18	[M+H]+	-	Soyasaponin βe	Terpenoids	Triterpene Saponin	-	1	207870
pmp000201	Positive	943.53	599.39	942.519	C48H78O18	[M+H]+	C08983	Soyasaponin βb (Soyasaponin I)	Terpenoids	Triterpene Saponin	-	1	1140500
pmp000560	Positive	947.52	143.1	946.514	C47H78O19	[M+H]+	C17801	Astragaloside VI	Terpenoids	Triterpene Saponin	84687-45-6	1	521340
pmp000561	Positive	947.52	143.1	946.514	C47H78O19	[M+H]+	C17802	Astragaloside VII	Terpenoids	Triterpene Saponin	84687-46-7	1	156820
pmp000559	Positive	947.52	143.1	946.514	C47H78O19	[M+H]+	C17800	Astragaloside V	Terpenoids	Triterpene Saponin	84687-44-5	1	454610
Hmjp002396	Positive	959.52	797.47	958.513	C48H78O19	[M+H]+	-	Centellasaponin A	Terpenoids	Triterpene Saponin	-	3	16041
Lmwp005925	Positive	973.5	471.35	972.493	C48H76O20	[M+H]+	-	Azukisaponin IV	Terpenoids	Triterpene Saponin	82793-04-2	2	144890
Hmjp002326	Positive	975.52	487.34	974.509	C48H78O20	[M+H]+	-	Asiaticoside A (Madecassoside)	Terpenoids	Triterpene Saponin	34540-22-2	3	13285
HJN097	Negative	1133.54	1133.54	1134.55	C54H86O25	[M-H]-	-	Azukisaponin VI	Terpenoids	Triterpene Saponin	82801-39-6	3	88492
MWSmce678	Negative	193.09	108.02	194.23	C11H14O3	[M-H]-	-	Deoxyarbutin	Terpenoids	Terpene	53936-56-4	1	1512900
pmn001381	Negative	349.15	187.1	350.158	C15H26O9	[M-H]-	-	Eucommioside	Terpenoids	Terpene	-	2	207570
pmf0096	Negative	88.99	70.9	89.995	C2H2O4	[M-H]-	C00209	Oxalic acid	Organic acids	Organic acids	144-62-7	3	63413
MWS4285	Negative	89.02	71.02	90.032	C3H6O3	[M-H]-	C00186	L-Lactic Acid	Organic acids	Organic acids	79-33-4	3	8405.7
pme2601	Negative	89	59	90.032	C3H6O3	[M-H]-	C01013	3-Hydroxypropanoic acid	Organic acids	Organic acids	503-66-2	3	30816
MWS2040	Negative	94.98	79.96	95.988	CH4O3S	[M-H]-	C11145	Methanesulfonic acid	Organic acids	Organic acids	75-75-2	3	62497
Lmqp000873	Positive	101.02	55.02	100.018	C4H4O3	[M+H]+	C19524	Succinic anhydride	Organic acids	Organic acids	108-30-5	3	105740
mws4052	Positive	102.05	56.05	101.048	C4H7NO2	[M+H]+	C01234	1-Aminocyclopropane-1-carboxylic acid	Organic acids	Organic acids	22059-21-8	3	50174
pme3017	Positive	104.07	58	103.063	C4H9NO2	[M+H]+	C03665	2-Aminoisobutyric acid	Organic acids	Organic acids	62-57-7	2	4071100
pme3011	Positive	104.07	68.8	103.063	C4H9NO2	[M+H]+	C00334	γ-Aminobutyric acid	Organic acids	Organic acids	56-12-2	2	1675300
ML10172161	Negative	103	59.01	104.011	C3H4O4	[M-H]-	C00168	Hydroxypyruvic acid	Organic acids	Organic acids	1113-60-6	1	945490
Lmbn000193	Negative	103	59.01	104.011	C3H4O4	[M-H]-	C01146	Tartronate semialdehyde	Organic acids	Organic acids	2480-77-5	3	1429500
mws0574	Negative	103.04	57.03	104.047	C4H8O3	[M-H]-	C21297	2-Hydroxyisobutyric acid*	Organic acids	Organic acids	594-61-6	2	178620
mws0576	Negative	103.04	59.1	104.047	C4H8O3	[M-H]-	C01089	3-Hydroxybutyric acid*	Organic acids	Organic acids	300-85-6	2	9929700
mws0206	Negative	103.04	57.03	104.047	C4H8O3	[M-H]-	C05984	2-Hydroxybutyric Acid*	Organic acids	Organic acids	3347-90-8	2	143720
pme1975	Negative	103	59	104.06	C3H4O4	[M-H]-	C00383	Malonic acid	Organic acids	Organic acids	141-82-2	3	9763500
mws0601	Negative	110.02	66	111.032	C5H5NO2	[M-H]-	C05942	Pyrrole-2-carboxylic acid	Organic acids	Organic acids	634-97-9	2	250900
pme1936	Positive	114.07	86	113.059	C4H7N3O	[M+H]+	C00791	Creatinine	Organic acids	Organic acids	60-27-5	3	56503
mws0376	Negative	115	71	116.011	C4H4O4	[M-H]-	C00122	Fumaric acid	Organic acids	Organic acids	110-17-8	3	951440
mws0823	Negative	115.04	71	116.047	C5H8O3	[M-H]-	C00141	3-Methyl-2-Oxobutanoic acid	Organic acids	Organic acids	759-05-7	2	96539
pme0275	Negative	115.05	97	116.047	C5H8O3	[M]-	-	4-Oxopentanoic Acid	Organic acids	Organic acids	123-76-2	3	18511
mws0845	Negative	115.08	97	116.084	C6H12O2	[M-H]-	C21399	4-Methylpentanoic acid	Organic acids	Organic acids	646-07-1	3	11816
pme0120	Positive	118.09	101	117.079	C5H11NO2	[M+H]+	C00431	5-Aminovaleric acid	Organic acids	Organic acids	660-88-8	2	96213
mws0470	Negative	117.02	73	118.027	C4H6O4	[M-H]-	C02170	Methylmalonic acid	Organic acids	Organic acids	516-05-2	1	13192000
mws0192	Negative	117.02	73	118.027	C4H6O4	[M-H]-	C00042	Succinic acid	Organic acids	Organic acids	110-15-6	1	14545000
mws0640	Negative	117.06	71	118.063	C5H10O3	[M-H]-	-	2-Hydroxy-2-methylbutyric acid	Organic acids	Organic acids	3739-30-8	2	12358
mws0147	Negative	117.06	59	118.063	C5H10O3	[M-H]-	C20827	β-Hydroxyisovaleric acid	Organic acids	Organic acids	625-08-1	3	877190
MWS0403	Positive	119.07	59.05	118.063	C5H10O3	[M+H]+	-	(R)-(-)-3-Hydroxybutyric acid methyl ester	Organic acids	Organic acids	3976-69-0	3	7306.2
pme3096	Negative	118	74	119.022	C3H5NO4	[M-H]-	C00872	Aminomalonic acid	Organic acids	Organic acids	1068-84-4	3	433510
pme1216	Negative	122.03	78	123.032	C6H5NO2	[M-H]-	C10164	2-Picolinic acid	Organic acids	Organic acids	98-98-6	3	4573000
mws0236	Negative	124.01	80	125.015	C2H7NO3S	[M-H]-	C00245	2-Aminoethanesulfonic acid	Organic acids	Organic acids	107-35-7	3	10027
MWSmce536	Negative	125.02	79.02	126.11	C6H6O3	[M-H]-	-	Methyl 2-furoate	Organic acids	Organic acids	611-13-2	3	54402
Rfmb319	Positive	130.09	84.08	129.079	C6H11NO2	[M+H]+	C00408	Pipecolic acid	Organic acids	Organic acids	4043-87-2	2	8825600
Zmgn000217	Negative	129.02	85.03	130.027	C5H6O4	[M-H]-	C00490	Methylenesuccinic acid	Organic acids	Organic acids	97-65-4	3	1080200
mws0425	Negative	129.02	85	130.027	C5H6O4	[M-H]-	C02226	Citraconic acid	Organic acids	Organic acids	498-23-7	3	634860
mws0373	Negative	129.06	83.05	130.063	C6H10O3	[M-H]-	C00233	4-Methyl-2-oxovalerate*	Organic acids	Organic acids	816-66-0	3	7765.9
Lmbn001718	Negative	129.06	57.03	130.063	C6H10O3	[M-H]-	C00671	3-Methyl-2-oxopentanoic acid*	Organic acids	Organic acids	24809-08-3	3	71390
ML10197929	Negative	130.09	88.04	131.069	C4H9N3O2	[M-H]-	C00300	Creatine	Organic acids	Organic acids	57-00-1	2	192610
pme0274	Positive	132.1	69	131.095	C6H13NO2	[M+H]+	C02378	6-Aminocaproic acid	Organic acids	Organic acids	60-32-2	2	43163
Lmbn001288	Negative	131.03	87.04	132.042	C5H8O4	[M-H]-	C06010	2-Hydroxy-2-methyl-3-oxobutanoic acid	Organic acids	Organic acids	71698-08-3	3	314370
Lmmn000806	Negative	131.03	87.05	132.042	C5H8O4	[M-H]-	-	Dimethylmalonic acid	Organic acids	Organic acids	595-46-0	2	243820
pme0243	Negative	131.03	87.05	132.042	C5H8O4	[M-H]-	C00489	Glutaric acid	Organic acids	Organic acids	110-94-1	3	1067700
Lmmn002164	Negative	131.03	87.05	132.042	C5H8O4	[M-H]-	-	Monomethyl succinate	Organic acids	Organic acids	3878-55-5	2	227440
pme3034	Negative	131.03	69.03	132.042	C5H8O4	[M-H]-	-	Ethylmalonic acid	Organic acids	Organic acids	601-75-2	3	39914
mws0473	Negative	131.03	87.05	132.042	C5H8O4	[M-H]-	-	2-Methylsuccinic acid	Organic acids	Organic acids	498-21-5	2	1089600
Lmgn000160	Negative	131.05	70.03	132.053	C4H8N2O3	[M-H]-	C02642	3-Ureidopropionic Acid	Organic acids	Organic acids	462-88-4	1	1277500
mws0972	Negative	131.07	85.07	132.079	C6H12O3	[M-H]-	C06103	6-Hydroxyhexanoic acid	Organic acids	Organic acids	1191-25-9	2	266290
Lmrn002746	Negative	131.07	85.07	132.079	C6H12O3	[M-H]-	-	2-Hydroxy-4-methylpentanoic acid	Organic acids	Organic acids	498-36-2	2	133870
mws0341	Negative	131.07	85	132.079	C6H12O3	[M-H]-	C03264	2-Hydroxyisocaproic acid	Organic acids	Organic acids	20312-37-2	1	4060700
MWS1882	Negative	132.03	88.04	133.038	C4H7NO4	[M-H]-	C19911	Iminodiacetic acid	Organic acids	Organic acids	142-73-4	1	470270
mws0275	Negative	133.01	71.01	134.022	C4H6O5	[M-H]-	C00149	L-Malic acid	Organic acids	Organic acids	97-67-6	1	489390
Zmgn000503	Negative	133.05	71.01	134.058	C5H10O4	[M-H]-	C04039	2,3-Dihydroxy-3-Methylbutanoic Acid	Organic acids	Organic acids	1756-18-9	2	14632000
pme3207	Negative	141.02	59	142.027	C6H6O4	[M-H]-	C02480	Muconic acid	Organic acids	Organic acids	1119-72-8	2	932880
Rfmb320	Positive	144.1	84.08	143.095	C7H13NO2	[M+H]+	-	1-Methylpiperidine-2-carboxylic acid	Organic acids	Organic acids	7730-87-2	3	1736700
mws0340	Negative	143.03	111	144.042	C6H8O4	[M-H]-	-	2,3-Dimethylsuccinic acid	Organic acids	Organic acids	13545-04-5	3	18642
pme0295	Positive	146.08	86	145.074	C6H11NO3	[M+H]+	C02946	4-Acetamidobutyric acid	Organic acids	Organic acids	3025-96-5	2	2132000
mws0567	Positive	146.09	87	145.085	C5H11N3O2	[M+H]+	C01035	4-Guanidinobutyric acid	Organic acids	Organic acids	463-00-3	1	4129500
pme2380	Negative	145.01	101	146.022	C5H6O5	[M-H]-	C00026	α-Ketoglutaric acid	Organic acids	Organic acids	328-50-7	3	380820
Lmgn000224	Negative	145.01	57.03	146.022	C5H6O5	[M-H]-	C06030	2-Methyl-3-oxosuccinic acid	Organic acids	Organic acids	-	3	29606
MWS5136	Negative	145.05	101.06	146.058	C6H10O4	[M-H]-	-	Mono-Methyl Glutarate	Organic acids	Organic acids	1501-27-5	3	29469
Lmbn001609	Negative	145.05	83.05	146.058	C6H10O4	[M-H]-	C06006	2-Acetyl-2-Hydroxybutanoic Acid	Organic acids	Organic acids	-	3	20886
mws0924	Negative	145.05	101	146.058	C6H10O4	[M-H]-	-	2-Methylglutaric acid	Organic acids	Organic acids	617-62-9	2	318660
Wmzn000227	Negative	145.06	109.04	146.058	C6H10O4	[M-H]-	-	2,2-Dimethylsuccinic acid	Organic acids	Organic acids	597-43-3	3	17186
Lmbn001676	Negative	145.05	101.06	146.058	C6H10O4	[M-H]-	C14463	3-Hydroxy-3-Methyl-2-Oxopentanoic Acid	Organic acids	Organic acids	-	3	34453
mws0208	Negative	145.05	101	146.058	C6H10O4	[M-H]-	C06104	Adipic Acid	Organic acids	Organic acids	124-04-9	2	252750
pme3146	Negative	145.06	102	146.069	C5H10N2O3	[M-H]-	C05100	β-Ureidoisobutyric acid	Organic acids	Organic acids	2905-86-4	3	40091
Lmbn000216	Negative	147.03	57.03	148.037	C5H8O5	[M-H]-	C06032	3-Methylmalic acid*	Organic acids	Organic acids	152204-30-3	1	668570
MWS3036	Negative	147.03	85.03	148.037	C5H8O5	[M-H]-	-	3-Hydroxyglutaric acid	Organic acids	Organic acids	638-18-6	2	2940100
pmb2826	Negative	147.03	87.1	148.037	C5H8O5	[M-H]-	C02614	L-Citramalic acid*	Organic acids	Organic acids	6236-09-5	1	4908000
Zmyn000247	Negative	147.03	57.03	148.037	C5H8O5	[M-H]-	C03196	2-Hydroxyglutaric Acid	Organic acids	Organic acids	13095-48-2	1	759270
mws0262	Negative	149.01	87	150.016	C4H6O6	[M-H]-	C00898	L-Tartaric acid	Organic acids	Organic acids	87-69-4	3	171160
mws0489	Negative	149.02	77	150.032	C8H6O3	[M-H]-	C02137	Benzoylformic acid	Organic acids	Organic acids	611-73-4	3	204800
pmf0420	Negative	149.06	74.9	150.068	C9H10O2	[M-H]-	C15513	Benzyl acetate	Organic acids	Organic acids	140-11-4	3	215060
Zmgn004894	Negative	151.04	136.02	152.047	C8H8O3	[M-H]-	-	Methyl 4-hydroxybenzoate	Organic acids	Organic acids	99-76-3	3	1383000
Zmyn002323	Negative	151.04	107.05	152.047	C8H8O3	[M-H]-	C05852	2-Hydroxyphenylacetic acid	Organic acids	Organic acids	614-75-5	3	136300
MWS1962	Positive	153.13	83.05	152.12	C10H16O	[M+H]+	C09847	cis-Citral	Organic acids	Organic acids	5392-40-5	3	111520
MWSmce183	Negative	151.04	77.04	152.15	C8H8O3	[M-H]-	-	D-(-)-Mandelic acid	Organic acids	Organic acids	611-71-2	3	82959
pmb3099	Negative	153.03	125	154.039	C4H11O4P	[M-H]-	C06608	Diethyl phosphate	Organic acids	Organic acids	598-02-7	3	25709
MWS1837	Positive	158.12	95.09	157.11	C8H15NO2	[M+H]+	-	TranexamicAcid	Organic acids	Organic acids	1197-18-8	3	59405
MWS0980	Negative	157.03	70.03	158.033	C5H6N2O4	[M-H]-	C00337	L-Dihydroorotic Acid	Organic acids	Organic acids	5988-19-2	3	529.64
Lmbn001467	Negative	158.08	116.07	159.09	C7H13NO3	[M-H]-	C03087	5-Acetamidopentanoic Acid	Organic acids	Organic acids	1072-10-2	1	721620
Zmjn001813	Negative	159.07	97.06	160.074	C7H12O4	[M-H]-	C02656	Pimelic acid	Organic acids	Organic acids	111-16-0	2	600950
Lmbn002072	Negative	159.07	97.07	160.074	C7H12O4	[M-H]-	C16657	2-Propylsuccinic acid	Organic acids	Organic acids	618-57-5	2	709580
mws0159	Negative	163.04	91	164.047	C9H8O3	[M-H]-	C00166	Phenylpyruvic acid	Organic acids	Organic acids	156-06-9	3	81541
MWS5238	Positive	165.09	91.05	164.084	C10H12O2	[M+H]+	-	4-PHENYLBUTYRIC ACID	Organic acids	Organic acids	1821-12-1	3	38702
MWS0274	Negative	165.06	119.05	166.063	C9H10O3	[M-H]-	C01479	Phenyllactate(Pla)	Organic acids	Organic acids	828-01-3	1	766140
MWSmce583	Negative	165.02	91.02	166.13	C8H6O4	[M-H]-	-	Piperonylic acid	Organic acids	Organic acids	94-53-1	3	127210
pme3186	Negative	169	79	169.998	C3H7O6P	[M-H]-	C00661	DL-Glyceraldehyde-3-phosphate	Organic acids	Organic acids	591-59-3	3	186510
Lmbn003524	Negative	171.1	99.08	172.11	C9H16O3	[M-H]-	C16322	9-Oxononanoic acid	Organic acids	Organic acids	2553-17-5	2	1029800
MWSslk038	Positive	174.11	114.09	173.21	C8H15NO3	[M+H]+	-	6-Acetamidohexanoic acid	Organic acids	Organic acids	57-08-9	3	26454
pme3009	Positive	175.02	99	174.016	C6H6O6	[M+H]+	C02341	Trans-Citridic acid	Organic acids	Organic acids	4023-65-8	2	887640
Lmgn002184	Negative	173.05	93.03	174.053	C7H10O5	[M-H]-	C16588	2-Oxoheptanedionic acid	Organic acids	Organic acids	17126-90-8	3	91195
Lmgn002091	Negative	173.05	93.03	174.053	C7H10O5	[M-H]-	C18307	2-Methyl-3-oxoadipic acid	Organic acids	Organic acids	-	3	87037
mws0154	Negative	173.05	93	174.053	C7H10O5	[M-H]-	C00493	Shikimic acid	Organic acids	Organic acids	138-59-0	3	84160
Lmgn002555	Negative	173.08	59.01	174.089	C8H14O4	[M-H]-	C16658	2-Propylglutaric acid	Organic acids	Organic acids	32806-62-5	2	2889400
mws0242	Negative	173.08	111	174.089	C8H14O4	[M-H]-	C08278	Suberic Acid	Organic acids	Organic acids	505-48-6	1	841210
Zmgn001448	Negative	175.06	115.04	176.068	C7H12O5	[M-H]-	C05994	2-Propylmalic Acid*	Organic acids	Organic acids	-	2	27454000
Lmbn001754	Negative	175.06	115.04	176.068	C7H12O5	[M-H]-	C04411	3-Isopropylmalic Acid*	Organic acids	Organic acids	921-28-8	2	32631000
pmb3101	Negative	175.06	115	176.068	C7H12O5	[M-H]-	C02504	2-Isopropylmalic Acid*	Organic acids	Organic acids	49601-06-1	2	29028000
pme2732	Positive	187.1	141	186.068	C12H10O2	[M+H]+	C13014	1-Naphthylacetic acid	Organic acids	Organic acids	86-87-3	3	360840
MWS4396	Negative	187.04	143.06	188.047	C11H8O3	[M-H]-	C03203	1-Hydroxy-2-Naphthoate	Organic acids	Organic acids	86-48-6	3	18303
mws0237	Negative	187.1	125	188.105	C9H16O4	[M-H]-	C08261	Azelaic acid	Organic acids	Organic acids	123-99-9	1	653520
Zmyn000453	Negative	191.02	111.01	192.027	C6H8O7	[M-H]-	C00311	Isocitric Acid*	Organic acids	Organic acids	320-77-4	1	26250000
mws0281	Negative	191.02	111.01	192.027	C6H8O7	[M-H]-	C00158	Citric Acid*	Organic acids	Organic acids	77-92-9	1	14948000
mws0277	Negative	191.06	85	192.063	C7H12O6	[M-H]-	C00296	Quinic Acid	Organic acids	Organic acids	77-95-2	2	1207600
pme0266	Negative	201.11	139	202.121	C10H18O4	[M-H]-	C08277	Sebacate	Organic acids	Organic acids	111-20-6	2	11250
Zmtn001464	Negative	204.03	160.04	205.038	C10H7NO4	[M-H]-	C02470	4,8-Dihydroxyquinoline-2-carboxylic acid	Organic acids	Organic acids	59-00-7	3	25519
mws0617	Negative	205.04	171	206.044	C8H14O2S2	[M-H]-	C00725	Lipoic acid	Organic acids	Organic acids	62-46-4	3	2377.1
Zmln000282	Negative	207.02	189	208.021	C6H8O8	[M-H]-	-	Hibiscus acid	Organic acids	Organic acids	6205-14-7	3	13980
pme1654	Negative	209.12	59.02	210.126	C12H18O3	[M-H]-	C08491	Jasmonic acid	Organic acids	Organic acids	77026-92-7	3	227160
MWS2073	Negative	218.96	160.96	219.969	C8H6Cl2O3	[M-H]-	C03664	2,4-Dichlorophenoxyacetic Acid	Organic acids	Organic acids	94-75-7	3	12213
MWS1912	Positive	227.16	153.13	226.157	C13H22O3	[M+H]+	-	Methyl dihydrojasmonate	Organic acids	Organic acids	24851-98-7	3	1911.1
Lmtn004049	Negative	263.13	204.12	264.136	C15H20O4	[M-H]-	C06082	Abscisic acid	Organic acids	Organic acids	21293-29-8	2	118060
Lmmn003323	Negative	271.23	225.22	272.235	C16H32O3	[M-H]-	-	2-Hydroxyhexadecanoic acid	Organic acids	Organic acids	764-67-0	2	112650
pmb2657	Negative	289.1	97.1	290.123	C10H18N4O6	[M-H]-	C03406	Argininosuccinic acid	Organic acids	Organic acids	2387-71-5	3	170700
MWS0155	Negative	462.07	96.97	463.074	C14H18N5O11P	[M-H]-	C03794	Adenylocuccinic Acid	Organic acids	Organic acids	19046-78-7	3	175600
pmb3059	Negative	543.1	191.2	544.128	C19H28O18	[M-H]-	-	Quinic acid O-di-glucuronic acid	Organic acids	Organic acids	-	3	60042
Hmbn004734	Negative	455.32	455.32	456.325	C29H44O4	[M-H]-	-	30-Norhederagenin	Steroids	Steroidal saponins	117654-06-5	3	17001
pmp001284	Positive	331.28	313.27	330.277	C19H38O4	[M+H]+	-	Monopalmitin	Lipids	Glycerol ester	542-44-9	2	285280
Lmhp011562	Positive	353.27	261.22	352.261	C21H36O4	[M+H]+	-	1-α-Linolenoyl-glycerol*	Lipids	Glycerol ester	-	1	99160
Lmhp011388	Positive	353.27	261.22	352.261	C21H36O4	[M+H]+	-	2-α-Linolenoyl-glycerol*	Lipids	Glycerol ester	55268-58-1	1	98915
Hmyn007168	Negative	483.27	255.23	484.278	C22H45O9P	[M-H]-	-	LysoPG 16:0	Lipids	Glycerol ester	-	3	1876.3
mws0120	Positive	258.11	104.11	257.103	C8H20NO6P	[M+H]+	C00670	Choline Alfoscerate	Lipids	PC	28319-77-9	2	1972500
pmd0132	Positive	496.34	184.07	495.332	C24H50NO7P	[M+H]+	-	LysoPC 16:0(2n isomer)*	Lipids	LPC	-	1	266720
pmb0855	Positive	496.34	184.07	495.332	C24H50NO7P	[M+H]+	-	LysoPC 16:0*	Lipids	LPC	17364-16-8	1	291820
pmb0854	Positive	518.32	184.07	517.317	C26H48NO7P	[M+H]+	-	LysoPC 18:3*	Lipids	LPC	-	1	85115
pmb0865	Positive	518.32	184.07	517.317	C26H48NO7P	[M+H]+	-	LysoPC 18:3(2n isomer)*	Lipids	LPC	-	1	80251
pmp001273	Positive	520.34	184.07	519.332	C26H50NO7P	[M+H]+	-	LysoPC 18:2*	Lipids	LPC	-	2	55236
pmp001251	Positive	520.34	184.07	519.332	C26H50NO7P	[M+H]+	-	LysoPC 18:2(2n isomer)*	Lipids	LPC	-	2	51730
pmp001281	Positive	522.36	184.07	521.348	C26H52NO7P	[M+H]+	-	LysoPC 18:1	Lipids	LPC	-	2	14850
mws0126	Positive	524.37	184.07	523.364	C26H54NO7P	[M+H]+	-	LysoPC 18:0*	Lipids	LPC	19420-57-6	2	2894
pmd0136	Positive	524.37	184.07	523.364	C26H54NO7P	[M+H]+	-	LysoPC 18:0(2n isomer)*	Lipids	LPC	-	2	4237.4
Lmhp007840	Positive	534.36	184.07	533.348	C27H52NO7P	[M+H]+	-	LysoPC 19:2*	Lipids	LPC	-	2	6373.3
Lmhp007598	Positive	534.36	184.07	533.348	C27H52NO7P	[M+H]+	-	LysoPC 19:2(2n isomer)*	Lipids	LPC	-	2	20105
pmb0876	Positive	454.29	313.27	453.286	C21H44NO7P	[M+H]+	-	LysoPE 16:0*	Lipids	LPE	53862-35-4	2	36342
pmd0160	Positive	454.29	313.27	453.286	C21H44NO7P	[M+H]+	-	LysoPE 16:0(2n isomer)*	Lipids	LPE	-	1	35737
pmb0874	Positive	478.29	337.27	477.286	C23H44NO7P	[M+H]+	-	LysoPE 18:2(2n isomer)	Lipids	LPE	-	2	10668
pmb0856	Positive	480.31	339.29	479.301	C23H46NO7P	[M+H]+	-	LysoPE 18:1(2n isomer)	Lipids	LPE	-	1	5513.9
mws0752	Negative	185.15	185.16	186.162	C11H22O2	[M-H]-	C17715	Undecylic Acid	Lipids	Free fatty acids	112-37-8	2	280010
pmb2640	Negative	199.17	199.17	200.178	C12H24O2	[M-H]-	C02679	Dodecanoic acid (Lauric acid)	Lipids	Free fatty acids	143-07-7	1	42894
MWS1900	Negative	215.13	153.13	216.136	C11H20O4	[M-H]-	-	Undecanedioic acid	Lipids	Free fatty acids	1852-04-6	1	1135500
mws5045	Negative	215.17	169.16	216.173	C12H24O3	[M-H]-	C08317	12-Hydroxydodecanoic acid	Lipids	Free fatty acids	505-95-3	1	38460
mws0119	Negative	227.2	227.2	228.209	C14H28O2	[M-H]-	C06424	Myristic Acid	Lipids	Free fatty acids	544-63-8	1	7833500
mws0474	Negative	229.14	211	230.152	C12H22O4	[M-H]-	C02678	Dodecanedioic aicd	Lipids	Free fatty acids	693-23-2	1	43536
MWS0552	Negative	239.2	223.03	240.209	C15H28O2	[M-H]-	-	cis-1-Pentadecenoic Acid(C15: 1)	Lipids	Free fatty acids	84743-29-3	2	84421
MWS2430	Negative	241.22	241.21	242.225	C15H30O2	[M-H]-	-	13-methylmyristic acid	Lipids	Free fatty acids	2485-71-4	2	79874
mws1488	Negative	255.23	237.22	256.24	C16H32O2	[M-H]-	C00249	Palmitic acid	Lipids	Free fatty acids	57-10-3	1	29492
mws0383	Negative	267.23	267.23	268.24	C17H32O2	[M-H]-	-	10-Heptadecenoic Acid	Lipids	Free fatty acids	29743-97-3	2	607750
mws0366	Negative	277.22	277.22	278.225	C18H30O2	[M-H]-	C06426	γ-Linolenic Acid*	Lipids	Free fatty acids	506-26-3	1	6073200
mws0367	Negative	277.22	277.22	278.225	C18H30O2	[M-H]-	C06427	α-Linolenic Acid*	Lipids	Free fatty acids	463-40-1	1	5860900
pmb0889	Positive	279.23	95.1	278.225	C18H30O2	[M+H]+	C08364	Punicic acid (9Z,11E,13Z-octadecatrienoic acid)	Lipids	Free fatty acids	544-72-9	2	294660
mws1491	Negative	279.23	279.23	280.24	C18H32O2	[M-H]-	C01595	Linoleic acid	Lipids	Free fatty acids	60-33-3	1	14554000
YC512118	Positive	282.28	247.24	281.272	C18H35NO	[M+H]+	C19670	Oleamide (9-Octadecenamide)	Lipids	Free fatty acids	301-02-0	1	2511.4
mws2623	Negative	281.25	281.25	282.256	C18H34O2	[M-H]-	C21944	11-Octadecanoic acid(Vaccenic acid)	Lipids	Free fatty acids	506-17-2	2	1495000
Zmyn005026	Negative	283.26	283.26	284.272	C18H36O2	[M-H]-	C20356	16-Methylheptadecanoic acid	Lipids	Free fatty acids	2724-58-5	3	10333000
mws1489	Negative	283.26	283.26	284.272	C18H36O2	[M-H]-	C01530	Stearic Acid	Lipids	Free fatty acids	57-11-4	3	23656000
Zmyn005252	Negative	285.24	239.24	286.251	C17H34O3	[M-H]-	C11849	3-Hydroxy-palmitic acid methyl ester	Lipids	Free fatty acids	51883-36-4	3	3644.3
Lmyn007883	Negative	287.22	287.22	288.23	C16H32O4	[M-H]-	-	9,16-Dihydroxypalmitic acid	Lipids	Free fatty acids	38076-49-2	2	302170
Zmyn004548	Negative	291.2	235.17	292.204	C18H28O3	[M-H]-	C01226	12-Oxo-phytodienoic acid	Lipids	Free fatty acids	85551-10-6	3	13586
Zmyn004732	Negative	293.21	185.12	294.219	C18H30O3	[M-H]-	C16342	2R-hydroxy-9Z,12Z,15Z-octadecatrienoic acid*	Lipids	Free fatty acids	-	2	2478.7
Zmyn004676	Negative	293.21	113.1	294.219	C18H30O3	[M-H]-	C16346	17-Hydroxylinolenic acid	Lipids	Free fatty acids	-	1	172140
pmb2787	Negative	293.21	275.1	294.219	C18H30O3	[M-H]-	C14766	9-Oxo-10E,12Z-octadecadienoic acid	Lipids	Free fatty acids	54232-59-6	2	18632
pmb2786	Negative	293.21	235.17	294.219	C18H30O3	[M-H]-	C16326	9-Hydroxy-10,12,15-octadecatrienoic acid*	Lipids	Free fatty acids	89886-42-0	2	18313
Lmbn005369	Negative	295.23	195.14	296.235	C18H32O3	[M-H]-	C14762	13(S)-HODE;13(S)-Hydroxyoctadeca-9Z,11E-dienoic acid	Lipids	Free fatty acids	10219-69-9	2	158530
Zmyn004714	Negative	297.24	183.14	298.251	C18H34O3	[M-H]-	C08365	Ricinoleic acid	Lipids	Free fatty acids	141-22-0	2	16216
Zmyn005384	Negative	299.26	253.26	300.266	C18H36O3	[M-H]-	C03042	2R-Hydroxyoctadecanoic Acid	Lipids	Free fatty acids	26633-48-7	3	7615.2
Lmqn008288	Negative	299.26	299.26	300.267	C18H36O3	[M-H]-	-	3-Hydroxyoctadecanoic Acid	Lipids	Free fatty acids	45261-96-9	2	284290
pmn001610	Negative	307.26	307.3	308.272	C20H36O2	[M-H]-	C16525	Eicosadienoic acid	Lipids	Free fatty acids	5598-38-9	2	13623
Zmyn004449	Negative	309.21	171.1	310.214	C18H30O4	[M-H]-	C21923	9-Hydroxy-12-oxo-10(E),15(Z)-octadecadienoic acid	Lipids	Free fatty acids	-	2	59003
MWS80006	Negative	311.22	293.21	312.23	C18H32O4	[M-H]-	C14827	9-Hydroperoxy-9Z,11E-Octadecadienoic Acid	Lipids	Free fatty acids	5502-91-0	2	22792
pmn001689	Negative	311.22	223.17	312.23	C18H32O4	[M-H]-	C21924	9-Hydroxy-12-oxo-15(Z)-octadecenoic acid	Lipids	Free fatty acids	-	1	16247000
Lmbn007891	Negative	313.24	183.14	314.246	C18H34O4	[M-H]-	-	Hydroxy ricinoleic acid	Lipids	Free fatty acids	-	1	781320
pmn001691	Negative	327.22	291.2	328.225	C18H32O5	[M-H]-	-	9,12,13-Trihydroxy-10,15-octadecadienoic acid	Lipids	Free fatty acids	-	1	3842800
Hmqn003054	Negative	329.23	311.23	330.24	C18H34O5	[M-H]-	-	9,10,11-Trihydroxy-12-octadecenoic acid	Lipids	Free fatty acids	61911-67-9	1	2884100
Lmbn004240	Negative	329.23	199.13	330.241	C18H34O5	[M-H]-	C14837	9,10-Dihydroxy-12,13-epoxyoctadecanoic acid	Lipids	Free fatty acids	-	2	374160
pmn001694	Negative	329.23	229.15	330.241	C18H34O5	[M-H]-	C14835	9,10,13-Trihydroxy-11-Octadecenoic Acid	Lipids	Free fatty acids	29907-57-1	1	30224000
mws0949	Negative	337.24	127.08	338.246	C20H34O4	[M-H]-	C14773	8,9-Dihydroxy-5Z,11Z,14Z-eicosatrienoic acid	Lipids	Free fatty acids	192461-96-4	2	3438.3
pmp001259	Positive	526.34	508.33	525.33	C28H47NO8	[M+H]+	-	5,8,11,14-Pentadecanoamide	Lipids	Free fatty acids	-	2	43568
pmp001276	Positive	677.37	677.37	676.367	C33H56O14	[M+H]+	-	1-Linolenoyl-rac-glycerol-diglucoside	Lipids	Free fatty acids	-	2	118250
